# Supplementary material for: Single Nucleus Multiomic Profiling Reveals Age-Dynamic Regulation of Host Genes Associated with SARS-CoV-2 Infection
Source: bioRxiv preprint, doi:10.1101/2020.04.12.037580, version 1 (2020-04-14)
Supplement: Supplementary Table 8 [file 037580_file10.xlsx]

## Sheet: Primer_Squences_v2
Tagmentation oligos			PCR primers			Sequencing Primers (NextSeq500/550, HiSeq4000, NOVASeq6000)
Name	5'-3'		i7_universal	5'-3'		Name	5'-3'
pMENTs	5Phos/CTGTCTCTTATACACATCT		i7_uni_v2	CAAGCAGAAGACGGCATACGAGATGGAGGTCACTACGTCTCGTGGGCTCGG		Read 1 Sequencing Primer	GCGATCGAGGACGGCAGATGTGTATAAGAGACAG
T5 universal	5'-3'		i5 indexed	5'-3'		Read 2 Sequencing Primer	CACCGTCTCCGCCTCAGATGTGTATAAGAGACAG
T5_uni_v2	TCGTCGGCAGCGTCTCCACGCCCGGATGATCGCGATCGAGGACGGCAGATGTGTATAAGAGACAG		i5_v2_1	AATGATACGGCGACCACCGAGATCTACACCCACCAACTGCTTCGTCGGCAGCGTC		Index 1 Sequencing Primer	CTGTCTCTTATACACATCTGAGGCGGAGACGGTG
			i5_v2_2	AATGATACGGCGACCACCGAGATCTACACGATCGATAACCTTCGTCGGCAGCGTC		Index 2 Sequencing Primer	GCGTGGAGACGCTGCCGACGA
T7_indexed	5'-3'		i5_v2_3	AATGATACGGCGACCACCGAGATCTACACTGGACTCGACGTTCGTCGGCAGCGTC
T7_v2_1	GTCTCGTGGGCTCGGCTGTCCCTGTCCCCTCGTGCTACACCGTCTCCGCCTCAGATGTGTATAAGAGACAG		i5_v2_4	AATGATACGGCGACCACCGAGATCTACACGAGATCGAGTAGTCGTCGGCAGCGTC
T7_v2_2	GTCTCGTGGGCTCGGCTGTCCCTGTCCATCGATCCGCCACCGTCTCCGCCTCAGATGTGTATAAGAGACAG		i5_v2_5	AATGATACGGCGACCACCGAGATCTACACAGCTGGGCAAATTCGTCGGCAGCGTC
T7_v2_3	GTCTCGTGGGCTCGGCTGTCCCTGTCCCTCCAGGTATCACCGTCTCCGCCTCAGATGTGTATAAGAGACAG		i5_v2_6	AATGATACGGCGACCACCGAGATCTACACTTGAGCTCTTAGTCGTCGGCAGCGTC
T7_v2_4	GTCTCGTGGGCTCGGCTGTCCCTGTCCACTTACGCGGCACCGTCTCCGCCTCAGATGTGTATAAGAGACAG		i5_v2_7	AATGATACGGCGACCACCGAGATCTACACGACCTTTGGACGTCGTCGGCAGCGTC
T7_v2_5	GTCTCGTGGGCTCGGCTGTCCCTGTCCTCCCTACCTTCACCGTCTCCGCCTCAGATGTGTATAAGAGACAG		i5_v2_8	AATGATACGGCGACCACCGAGATCTACACTTCTGACCTTAGTCGTCGGCAGCGTC
T7_v2_6	GTCTCGTGGGCTCGGCTGTCCCTGTCCCTACTGCAAGCACCGTCTCCGCCTCAGATGTGTATAAGAGACAG		i5_v2_9	AATGATACGGCGACCACCGAGATCTACACGCCCTTCTAATTTCGTCGGCAGCGTC
T7_v2_7	GTCTCGTGGGCTCGGCTGTCCCTGTCCTTTATCCCGACACCGTCTCCGCCTCAGATGTGTATAAGAGACAG		i5_v2_10	AATGATACGGCGACCACCGAGATCTACACGAGTGGAGGATGTCGTCGGCAGCGTC
T7_v2_8	GTCTCGTGGGCTCGGCTGTCCCTGTCCCATCCGAATTCACCGTCTCCGCCTCAGATGTGTATAAGAGACAG		i5_v2_11	AATGATACGGCGACCACCGAGATCTACACAACTGATCGCGTTCGTCGGCAGCGTC
T7_v2_9	GTCTCGTGGGCTCGGCTGTCCCTGTCCCGCTTCAGTACACCGTCTCCGCCTCAGATGTGTATAAGAGACAG		i5_v2_12	AATGATACGGCGACCACCGAGATCTACACGACATTGCCTAATCGTCGGCAGCGTC
T7_v2_10	GTCTCGTGGGCTCGGCTGTCCCTGTCCAATACGTACGCACCGTCTCCGCCTCAGATGTGTATAAGAGACAG		i5_v2_13	AATGATACGGCGACCACCGAGATCTACACATCAGAGAGCTTTCGTCGGCAGCGTC
T7_v2_11	GTCTCGTGGGCTCGGCTGTCCCTGTCCATCTGAACGGCACCGTCTCCGCCTCAGATGTGTATAAGAGACAG		i5_v2_14	AATGATACGGCGACCACCGAGATCTACACTCTACTATGAGGTCGTCGGCAGCGTC
T7_v2_12	GTCTCGTGGGCTCGGCTGTCCCTGTCCCAAGTTACCGCACCGTCTCCGCCTCAGATGTGTATAAGAGACAG		i5_v2_15	AATGATACGGCGACCACCGAGATCTACACATTGTCGAGATGTCGTCGGCAGCGTC
T7_v2_13	GTCTCGTGGGCTCGGCTGTCCCTGTCCCTTGTGCTGGCACCGTCTCCGCCTCAGATGTGTATAAGAGACAG		i5_v2_16	AATGATACGGCGACCACCGAGATCTACACATCCGCTGTTGTTCGTCGGCAGCGTC
T7_v2_14	GTCTCGTGGGCTCGGCTGTCCCTGTCCATATCCTACGCACCGTCTCCGCCTCAGATGTGTATAAGAGACAG		i5_v2_17	AATGATACGGCGACCACCGAGATCTACACTACCAAGCCCAGTCGTCGGCAGCGTC
T7_v2_15	GTCTCGTGGGCTCGGCTGTCCCTGTCCACCAACACGTCACCGTCTCCGCCTCAGATGTGTATAAGAGACAG		i5_v2_18	AATGATACGGCGACCACCGAGATCTACACATGTGGTGTTTGTCGTCGGCAGCGTC
T7_v2_16	GTCTCGTGGGCTCGGCTGTCCCTGTCCGATTCAATGGCACCGTCTCCGCCTCAGATGTGTATAAGAGACAG		i5_v2_19	AATGATACGGCGACCACCGAGATCTACACCTCCTATCAGTTTCGTCGGCAGCGTC
T7_v2_17	GTCTCGTGGGCTCGGCTGTCCCTGTCCGGTTTGTAGGCACCGTCTCCGCCTCAGATGTGTATAAGAGACAG		i5_v2_20	AATGATACGGCGACCACCGAGATCTACACCGACTCATAACCTCGTCGGCAGCGTC
T7_v2_18	GTCTCGTGGGCTCGGCTGTCCCTGTCCTCCTTAGGTCCACCGTCTCCGCCTCAGATGTGTATAAGAGACAG		i5_v2_21	AATGATACGGCGACCACCGAGATCTACACAGACACAGCTATTCGTCGGCAGCGTC
T7_v2_19	GTCTCGTGGGCTCGGCTGTCCCTGTCCCTGGTAGTTTCACCGTCTCCGCCTCAGATGTGTATAAGAGACAG		i5_v2_22	AATGATACGGCGACCACCGAGATCTACACGCACATCACAACTCGTCGGCAGCGTC
T7_v2_20	GTCTCGTGGGCTCGGCTGTCCCTGTCCCCATAGGAGTCACCGTCTCCGCCTCAGATGTGTATAAGAGACAG		i5_v2_23	AATGATACGGCGACCACCGAGATCTACACCAGCTATTGACGTCGTCGGCAGCGTC
T7_v2_21	GTCTCGTGGGCTCGGCTGTCCCTGTCCCTAGAATACGCACCGTCTCCGCCTCAGATGTGTATAAGAGACAG		i5_v2_24	AATGATACGGCGACCACCGAGATCTACACCACATGGTGCACTCGTCGGCAGCGTC
T7_v2_22	GTCTCGTGGGCTCGGCTGTCCCTGTCCTACACATAGGCACCGTCTCCGCCTCAGATGTGTATAAGAGACAG		i5_v2_25	AATGATACGGCGACCACCGAGATCTACACGTTCATTGGGTATCGTCGGCAGCGTC
T7_v2_23	GTCTCGTGGGCTCGGCTGTCCCTGTCCCGCAAGTGTCCACCGTCTCCGCCTCAGATGTGTATAAGAGACAG		i5_v2_26	AATGATACGGCGACCACCGAGATCTACACTGATTGACGACCTCGTCGGCAGCGTC
T7_v2_24	GTCTCGTGGGCTCGGCTGTCCCTGTCCTGAACTCGATCACCGTCTCCGCCTCAGATGTGTATAAGAGACAG		i5_v2_27	AATGATACGGCGACCACCGAGATCTACACCTCCAGGTATCTTCGTCGGCAGCGTC
T7_v2_25	GTCTCGTGGGCTCGGCTGTCCCTGTCCTGGCGCAGTTCACCGTCTCCGCCTCAGATGTGTATAAGAGACAG		i5_v2_28	AATGATACGGCGACCACCGAGATCTACACAGATCTGGTCGATCGTCGGCAGCGTC
T7_v2_26	GTCTCGTGGGCTCGGCTGTCCCTGTCCGTAATGTGCACACCGTCTCCGCCTCAGATGTGTATAAGAGACAG		i5_v2_29	AATGATACGGCGACCACCGAGATCTACACCCTACTATCCGCTCGTCGGCAGCGTC
T7_v2_27	GTCTCGTGGGCTCGGCTGTCCCTGTCCCGTTCCGACTCACCGTCTCCGCCTCAGATGTGTATAAGAGACAG		i5_v2_30	AATGATACGGCGACCACCGAGATCTACACACTGATCCGTTTTCGTCGGCAGCGTC
T7_v2_28	GTCTCGTGGGCTCGGCTGTCCCTGTCCTCTCCATGCTCACCGTCTCCGCCTCAGATGTGTATAAGAGACAG		i5_v2_31	AATGATACGGCGACCACCGAGATCTACACATTCTCATGGCTTCGTCGGCAGCGTC
T7_v2_29	GTCTCGTGGGCTCGGCTGTCCCTGTCCCGAATTGTAGCACCGTCTCCGCCTCAGATGTGTATAAGAGACAG		i5_v2_32	AATGATACGGCGACCACCGAGATCTACACTTAAACGTCTCGTCGTCGGCAGCGTC
T7_v2_30	GTCTCGTGGGCTCGGCTGTCCCTGTCCTCTGTGCAGTCACCGTCTCCGCCTCAGATGTGTATAAGAGACAG		i5_v2_33	AATGATACGGCGACCACCGAGATCTACACGCCGTTTACAGCTCGTCGGCAGCGTC
T7_v2_31	GTCTCGTGGGCTCGGCTGTCCCTGTCCTGTTCGTGCCCACCGTCTCCGCCTCAGATGTGTATAAGAGACAG		i5_v2_34	AATGATACGGCGACCACCGAGATCTACACTGGCTATAGGGATCGTCGGCAGCGTC
T7_v2_32	GTCTCGTGGGCTCGGCTGTCCCTGTCCAGATCATGACCACCGTCTCCGCCTCAGATGTGTATAAGAGACAG		i5_v2_35	AATGATACGGCGACCACCGAGATCTACACGATCGGTTGCTGTCGTCGGCAGCGTC
T7_v2_33	GTCTCGTGGGCTCGGCTGTCCCTGTCCTTTAGCGAGTCACCGTCTCCGCCTCAGATGTGTATAAGAGACAG		i5_v2_36	AATGATACGGCGACCACCGAGATCTACACCTAATCCGAACATCGTCGGCAGCGTC
T7_v2_34	GTCTCGTGGGCTCGGCTGTCCCTGTCCCCATGGAGCACACCGTCTCCGCCTCAGATGTGTATAAGAGACAG		i5_v2_37	AATGATACGGCGACCACCGAGATCTACACGCTTTCGATTTGTCGTCGGCAGCGTC
T7_v2_35	GTCTCGTGGGCTCGGCTGTCCCTGTCCTAGTAGCGGCCACCGTCTCCGCCTCAGATGTGTATAAGAGACAG		i5_v2_38	AATGATACGGCGACCACCGAGATCTACACAGAGGTTGCGTCTCGTCGGCAGCGTC
T7_v2_36	GTCTCGTGGGCTCGGCTGTCCCTGTCCTCTCCGTTGACACCGTCTCCGCCTCAGATGTGTATAAGAGACAG		i5_v2_39	AATGATACGGCGACCACCGAGATCTACACAGGTGGATCAGCTCGTCGGCAGCGTC
T7_v2_37	GTCTCGTGGGCTCGGCTGTCCCTGTCCTTATCATCGCCACCGTCTCCGCCTCAGATGTGTATAAGAGACAG		i5_v2_40	AATGATACGGCGACCACCGAGATCTACACGACTTGCGTTATTCGTCGGCAGCGTC
T7_v2_38	GTCTCGTGGGCTCGGCTGTCCCTGTCCCGCCTTAGATCACCGTCTCCGCCTCAGATGTGTATAAGAGACAG		i5_v2_41	AATGATACGGCGACCACCGAGATCTACACAACTTTCAGAGGTCGTCGGCAGCGTC
T7_v2_39	GTCTCGTGGGCTCGGCTGTCCCTGTCCTGCCAGATGGCACCGTCTCCGCCTCAGATGTGTATAAGAGACAG		i5_v2_42	AATGATACGGCGACCACCGAGATCTACACATGGCACGACCATCGTCGGCAGCGTC
T7_v2_40	GTCTCGTGGGCTCGGCTGTCCCTGTCCACCGGGCTATCACCGTCTCCGCCTCAGATGTGTATAAGAGACAG		i5_v2_43	AATGATACGGCGACCACCGAGATCTACACACTTGGACATCGTCGTCGGCAGCGTC
T7_v2_41	GTCTCGTGGGCTCGGCTGTCCCTGTCCAATGAGGTTGCACCGTCTCCGCCTCAGATGTGTATAAGAGACAG		i5_v2_44	AATGATACGGCGACCACCGAGATCTACACGGTTCATGAAGCTCGTCGGCAGCGTC
T7_v2_42	GTCTCGTGGGCTCGGCTGTCCCTGTCCCAGACAATGACACCGTCTCCGCCTCAGATGTGTATAAGAGACAG		i5_v2_45	AATGATACGGCGACCACCGAGATCTACACTGTCTGCACGCATCGTCGGCAGCGTC
T7_v2_43	GTCTCGTGGGCTCGGCTGTCCCTGTCCGGTATAGCTTCACCGTCTCCGCCTCAGATGTGTATAAGAGACAG		i5_v2_46	AATGATACGGCGACCACCGAGATCTACACGAAGCGTTAGAATCGTCGGCAGCGTC
T7_v2_44	GTCTCGTGGGCTCGGCTGTCCCTGTCCGGTTCGGTAACACCGTCTCCGCCTCAGATGTGTATAAGAGACAG		i5_v2_47	AATGATACGGCGACCACCGAGATCTACACTGTGTCGATAGATCGTCGGCAGCGTC
T7_v2_45	GTCTCGTGGGCTCGGCTGTCCCTGTCCCTACATATCGCACCGTCTCCGCCTCAGATGTGTATAAGAGACAG		i5_v2_48	AATGATACGGCGACCACCGAGATCTACACTGTTGCTCCATTTCGTCGGCAGCGTC
T7_v2_46	GTCTCGTGGGCTCGGCTGTCCCTGTCCGTGTGATTCGCACCGTCTCCGCCTCAGATGTGTATAAGAGACAG		i5_v2_49	AATGATACGGCGACCACCGAGATCTACACAGACCTCCTAATTCGTCGGCAGCGTC
T7_v2_47	GTCTCGTGGGCTCGGCTGTCCCTGTCCCTCTCGTAGGCACCGTCTCCGCCTCAGATGTGTATAAGAGACAG		i5_v2_50	AATGATACGGCGACCACCGAGATCTACACAGCACCCTAGCTTCGTCGGCAGCGTC
T7_v2_48	GTCTCGTGGGCTCGGCTGTCCCTGTCCTCACCAGCGACACCGTCTCCGCCTCAGATGTGTATAAGAGACAG		i5_v2_51	AATGATACGGCGACCACCGAGATCTACACCAGAATCCTACGTCGTCGGCAGCGTC
T7_v2_49	GTCTCGTGGGCTCGGCTGTCCCTGTCCCCACTATGAGCACCGTCTCCGCCTCAGATGTGTATAAGAGACAG		i5_v2_52	AATGATACGGCGACCACCGAGATCTACACGCGTTGATCTGTTCGTCGGCAGCGTC
T7_v2_50	GTCTCGTGGGCTCGGCTGTCCCTGTCCTCTACCCACCCACCGTCTCCGCCTCAGATGTGTATAAGAGACAG		i5_v2_53	AATGATACGGCGACCACCGAGATCTACACCTAGTAACTCGATCGTCGGCAGCGTC
T7_v2_51	GTCTCGTGGGCTCGGCTGTCCCTGTCCTCACTTGGCCCACCGTCTCCGCCTCAGATGTGTATAAGAGACAG		i5_v2_54	AATGATACGGCGACCACCGAGATCTACACAAGTCACGGCGTTCGTCGGCAGCGTC
T7_v2_52	GTCTCGTGGGCTCGGCTGTCCCTGTCCGAAAGACATCCACCGTCTCCGCCTCAGATGTGTATAAGAGACAG		i5_v2_55	AATGATACGGCGACCACCGAGATCTACACACGGTCACACCTTCGTCGGCAGCGTC
T7_v2_53	GTCTCGTGGGCTCGGCTGTCCCTGTCCCAAGGATTGCCACCGTCTCCGCCTCAGATGTGTATAAGAGACAG		i5_v2_56	AATGATACGGCGACCACCGAGATCTACACGGGAACATCATATCGTCGGCAGCGTC
T7_v2_54	GTCTCGTGGGCTCGGCTGTCCCTGTCCTCACGATGTACACCGTCTCCGCCTCAGATGTGTATAAGAGACAG		i5_v2_57	AATGATACGGCGACCACCGAGATCTACACCGTTACGCGAAGTCGTCGGCAGCGTC
T7_v2_55	GTCTCGTGGGCTCGGCTGTCCCTGTCCAGTACATCGTCACCGTCTCCGCCTCAGATGTGTATAAGAGACAG		i5_v2_58	AATGATACGGCGACCACCGAGATCTACACTCTGTCAGCGAATCGTCGGCAGCGTC
T7_v2_56	GTCTCGTGGGCTCGGCTGTCCCTGTCCTGGACACTGCCACCGTCTCCGCCTCAGATGTGTATAAGAGACAG		i5_v2_59	AATGATACGGCGACCACCGAGATCTACACTCGGTGAAATCGTCGTCGGCAGCGTC
T7_v2_57	GTCTCGTGGGCTCGGCTGTCCCTGTCCCGAACTTCTGCACCGTCTCCGCCTCAGATGTGTATAAGAGACAG		i5_v2_60	AATGATACGGCGACCACCGAGATCTACACACCTCCATACCATCGTCGGCAGCGTC
T7_v2_58	GTCTCGTGGGCTCGGCTGTCCCTGTCCCTTCACCCTTCACCGTCTCCGCCTCAGATGTGTATAAGAGACAG		i5_v2_61	AATGATACGGCGACCACCGAGATCTACACGCCTAACTCGATTCGTCGGCAGCGTC
T7_v2_59	GTCTCGTGGGCTCGGCTGTCCCTGTCCAGATTCGCCTCACCGTCTCCGCCTCAGATGTGTATAAGAGACAG		i5_v2_62	AATGATACGGCGACCACCGAGATCTACACCGTCACAGATCTTCGTCGGCAGCGTC
T7_v2_60	GTCTCGTGGGCTCGGCTGTCCCTGTCCTCAGAGTCTCCACCGTCTCCGCCTCAGATGTGTATAAGAGACAG		i5_v2_63	AATGATACGGCGACCACCGAGATCTACACTATAGGCTAGCATCGTCGGCAGCGTC
T7_v2_61	GTCTCGTGGGCTCGGCTGTCCCTGTCCGAGGATGGAACACCGTCTCCGCCTCAGATGTGTATAAGAGACAG		i5_v2_64	AATGATACGGCGACCACCGAGATCTACACCAGAAGGCACATTCGTCGGCAGCGTC
T7_v2_62	GTCTCGTGGGCTCGGCTGTCCCTGTCCGCGCAAAGTACACCGTCTCCGCCTCAGATGTGTATAAGAGACAG		i5_v2_65	AATGATACGGCGACCACCGAGATCTACACATGAGGAAGAGTTCGTCGGCAGCGTC
T7_v2_63	GTCTCGTGGGCTCGGCTGTCCCTGTCCACGTATCGATCACCGTCTCCGCCTCAGATGTGTATAAGAGACAG		i5_v2_66	AATGATACGGCGACCACCGAGATCTACACCTGTCAATCCCATCGTCGGCAGCGTC
T7_v2_64	GTCTCGTGGGCTCGGCTGTCCCTGTCCTGTAGTGTCGCACCGTCTCCGCCTCAGATGTGTATAAGAGACAG		i5_v2_67	AATGATACGGCGACCACCGAGATCTACACCCAAATCACGTTTCGTCGGCAGCGTC
T7_v2_65	GTCTCGTGGGCTCGGCTGTCCCTGTCCTAGGAATGTGCACCGTCTCCGCCTCAGATGTGTATAAGAGACAG		i5_v2_68	AATGATACGGCGACCACCGAGATCTACACATAGTAACCTCCTCGTCGGCAGCGTC
T7_v2_66	GTCTCGTGGGCTCGGCTGTCCCTGTCCTATCCGAGCGCACCGTCTCCGCCTCAGATGTGTATAAGAGACAG		i5_v2_69	AATGATACGGCGACCACCGAGATCTACACAAGGATACATGCTCGTCGGCAGCGTC
T7_v2_67	GTCTCGTGGGCTCGGCTGTCCCTGTCCAGCATTACAGCACCGTCTCCGCCTCAGATGTGTATAAGAGACAG		i5_v2_70	AATGATACGGCGACCACCGAGATCTACACCCAGATGCACATTCGTCGGCAGCGTC
T7_v2_68	GTCTCGTGGGCTCGGCTGTCCCTGTCCAGCAGAAGTTCACCGTCTCCGCCTCAGATGTGTATAAGAGACAG		i5_v2_71	AATGATACGGCGACCACCGAGATCTACACACACGCGACTTTTCGTCGGCAGCGTC
T7_v2_69	GTCTCGTGGGCTCGGCTGTCCCTGTCCCACTCAGTTCCACCGTCTCCGCCTCAGATGTGTATAAGAGACAG		i5_v2_72	AATGATACGGCGACCACCGAGATCTACACGAACTGTAGCCCTCGTCGGCAGCGTC
T7_v2_70	GTCTCGTGGGCTCGGCTGTCCCTGTCCCAAGGCAGTACACCGTCTCCGCCTCAGATGTGTATAAGAGACAG		i5_v2_73	AATGATACGGCGACCACCGAGATCTACACATTAACGGTAGGTCGTCGGCAGCGTC
T7_v2_71	GTCTCGTGGGCTCGGCTGTCCCTGTCCGTAGTGGTTACACCGTCTCCGCCTCAGATGTGTATAAGAGACAG		i5_v2_74	AATGATACGGCGACCACCGAGATCTACACCATTATGCCGTCTCGTCGGCAGCGTC
T7_v2_72	GTCTCGTGGGCTCGGCTGTCCCTGTCCAAGGCAATCCCACCGTCTCCGCCTCAGATGTGTATAAGAGACAG		i5_v2_75	AATGATACGGCGACCACCGAGATCTACACTACCGCAGGACATCGTCGGCAGCGTC
T7_v2_73	GTCTCGTGGGCTCGGCTGTCCCTGTCCCGTTTGGCGACACCGTCTCCGCCTCAGATGTGTATAAGAGACAG		i5_v2_76	AATGATACGGCGACCACCGAGATCTACACATCCAGATGTCGTCGTCGGCAGCGTC
T7_v2_74	GTCTCGTGGGCTCGGCTGTCCCTGTCCTACTTGAACCCACCGTCTCCGCCTCAGATGTGTATAAGAGACAG		i5_v2_77	AATGATACGGCGACCACCGAGATCTACACGGGAATACGCATTCGTCGGCAGCGTC
T7_v2_75	GTCTCGTGGGCTCGGCTGTCCCTGTCCGTTAGGAGGACACCGTCTCCGCCTCAGATGTGTATAAGAGACAG		i5_v2_78	AATGATACGGCGACCACCGAGATCTACACTAGGTTCCGCTTTCGTCGGCAGCGTC
T7_v2_76	GTCTCGTGGGCTCGGCTGTCCCTGTCCGCATCCATAACACCGTCTCCGCCTCAGATGTGTATAAGAGACAG		i5_v2_79	AATGATACGGCGACCACCGAGATCTACACTACAATGTTCCGTCGTCGGCAGCGTC
T7_v2_77	GTCTCGTGGGCTCGGCTGTCCCTGTCCTACCAGTAGACACCGTCTCCGCCTCAGATGTGTATAAGAGACAG		i5_v2_80	AATGATACGGCGACCACCGAGATCTACACCCTTAGGAGCACTCGTCGGCAGCGTC
T7_v2_78	GTCTCGTGGGCTCGGCTGTCCCTGTCCTACGACCTGGCACCGTCTCCGCCTCAGATGTGTATAAGAGACAG		i5_v2_81	AATGATACGGCGACCACCGAGATCTACACGAATGGGACGGTTCGTCGGCAGCGTC
T7_v2_79	GTCTCGTGGGCTCGGCTGTCCCTGTCCTCATGACTCACACCGTCTCCGCCTCAGATGTGTATAAGAGACAG		i5_v2_82	AATGATACGGCGACCACCGAGATCTACACCGTCCGATAGCATCGTCGGCAGCGTC
T7_v2_80	GTCTCGTGGGCTCGGCTGTCCCTGTCCTGACTCAAACCACCGTCTCCGCCTCAGATGTGTATAAGAGACAG		i5_v2_83	AATGATACGGCGACCACCGAGATCTACACCGCGCATCCTAATCGTCGGCAGCGTC
T7_v2_81	GTCTCGTGGGCTCGGCTGTCCCTGTCCGGACTCTGTGCACCGTCTCCGCCTCAGATGTGTATAAGAGACAG		i5_v2_84	AATGATACGGCGACCACCGAGATCTACACTCCTTGACTGATTCGTCGGCAGCGTC
T7_v2_82	GTCTCGTGGGCTCGGCTGTCCCTGTCCATGCGCACCACACCGTCTCCGCCTCAGATGTGTATAAGAGACAG		i5_v2_85	AATGATACGGCGACCACCGAGATCTACACATCATGGTTGTGTCGTCGGCAGCGTC
T7_v2_83	GTCTCGTGGGCTCGGCTGTCCCTGTCCCTCAGTTGGCCACCGTCTCCGCCTCAGATGTGTATAAGAGACAG		i5_v2_86	AATGATACGGCGACCACCGAGATCTACACGACTCGGACATGTCGTCGGCAGCGTC
T7_v2_84	GTCTCGTGGGCTCGGCTGTCCCTGTCCGACAACTGCACACCGTCTCCGCCTCAGATGTGTATAAGAGACAG		i5_v2_87	AATGATACGGCGACCACCGAGATCTACACGGTCTACCATAATCGTCGGCAGCGTC
T7_v2_85	GTCTCGTGGGCTCGGCTGTCCCTGTCCCCTGGTATGTCACCGTCTCCGCCTCAGATGTGTATAAGAGACAG		i5_v2_88	AATGATACGGCGACCACCGAGATCTACACCGGGTTCGTATATCGTCGGCAGCGTC
T7_v2_86	GTCTCGTGGGCTCGGCTGTCCCTGTCCCATACACCGCCACCGTCTCCGCCTCAGATGTGTATAAGAGACAG		i5_v2_89	AATGATACGGCGACCACCGAGATCTACACTCGACGTTAGTTTCGTCGGCAGCGTC
T7_v2_87	GTCTCGTGGGCTCGGCTGTCCCTGTCCTACTCCAGCTCACCGTCTCCGCCTCAGATGTGTATAAGAGACAG		i5_v2_90	AATGATACGGCGACCACCGAGATCTACACGGGAGATTTACCTCGTCGGCAGCGTC
T7_v2_88	GTCTCGTGGGCTCGGCTGTCCCTGTCCGACCATGTTCCACCGTCTCCGCCTCAGATGTGTATAAGAGACAG		i5_v2_91	AATGATACGGCGACCACCGAGATCTACACCCACATTGTAGCTCGTCGGCAGCGTC
T7_v2_89	GTCTCGTGGGCTCGGCTGTCCCTGTCCTCGTCTTAGTCACCGTCTCCGCCTCAGATGTGTATAAGAGACAG		i5_v2_92	AATGATACGGCGACCACCGAGATCTACACTTGTGGAGTGTATCGTCGGCAGCGTC
T7_v2_90	GTCTCGTGGGCTCGGCTGTCCCTGTCCTCAGTGACCTCACCGTCTCCGCCTCAGATGTGTATAAGAGACAG		i5_v2_93	AATGATACGGCGACCACCGAGATCTACACGGGATGTATCTATCGTCGGCAGCGTC
T7_v2_91	GTCTCGTGGGCTCGGCTGTCCCTGTCCTAAGCGGAGACACCGTCTCCGCCTCAGATGTGTATAAGAGACAG		i5_v2_94	AATGATACGGCGACCACCGAGATCTACACGGCTCGTACAACTCGTCGGCAGCGTC
T7_v2_92	GTCTCGTGGGCTCGGCTGTCCCTGTCCGTGACCTGGACACCGTCTCCGCCTCAGATGTGTATAAGAGACAG		i5_v2_95	AATGATACGGCGACCACCGAGATCTACACTTACACGCGAAATCGTCGGCAGCGTC
T7_v2_93	GTCTCGTGGGCTCGGCTGTCCCTGTCCTACGGTGTTACACCGTCTCCGCCTCAGATGTGTATAAGAGACAG		i5_v2_96	AATGATACGGCGACCACCGAGATCTACACCATAAACGAACGTCGTCGGCAGCGTC
T7_v2_94	GTCTCGTGGGCTCGGCTGTCCCTGTCCCGACTGGACACACCGTCTCCGCCTCAGATGTGTATAAGAGACAG		i5_v2_97	AATGATACGGCGACCACCGAGATCTACACATCACCTCACCATCGTCGGCAGCGTC
T7_v2_95	GTCTCGTGGGCTCGGCTGTCCCTGTCCATTCAGCTCTCACCGTCTCCGCCTCAGATGTGTATAAGAGACAG		i5_v2_98	AATGATACGGCGACCACCGAGATCTACACGCTAAGTCCAATTCGTCGGCAGCGTC
T7_v2_96	GTCTCGTGGGCTCGGCTGTCCCTGTCCGGAGAGATAGCACCGTCTCCGCCTCAGATGTGTATAAGAGACAG		i5_v2_99	AATGATACGGCGACCACCGAGATCTACACCCAGTATGTCCATCGTCGGCAGCGTC
T7_v2_97	GTCTCGTGGGCTCGGCTGTCCCTGTCCCCCAGTGTCACACCGTCTCCGCCTCAGATGTGTATAAGAGACAG		i5_v2_100	AATGATACGGCGACCACCGAGATCTACACACAGACAGCCAATCGTCGGCAGCGTC
T7_v2_98	GTCTCGTGGGCTCGGCTGTCCCTGTCCAGCTAAGATCCACCGTCTCCGCCTCAGATGTGTATAAGAGACAG		i5_v2_101	AATGATACGGCGACCACCGAGATCTACACCTTACACGGGAGTCGTCGGCAGCGTC
T7_v2_99	GTCTCGTGGGCTCGGCTGTCCCTGTCCACCTGCGGATCACCGTCTCCGCCTCAGATGTGTATAAGAGACAG		i5_v2_102	AATGATACGGCGACCACCGAGATCTACACACACCCAGATTGTCGTCGGCAGCGTC
T7_v2_100	GTCTCGTGGGCTCGGCTGTCCCTGTCCGTTAACTCGCCACCGTCTCCGCCTCAGATGTGTATAAGAGACAG		i5_v2_103	AATGATACGGCGACCACCGAGATCTACACTGCTGAACTTCCTCGTCGGCAGCGTC
T7_v2_101	GTCTCGTGGGCTCGGCTGTCCCTGTCCTTTAAGCGAGCACCGTCTCCGCCTCAGATGTGTATAAGAGACAG		i5_v2_104	AATGATACGGCGACCACCGAGATCTACACAATGGCATGGTGTCGTCGGCAGCGTC
T7_v2_102	GTCTCGTGGGCTCGGCTGTCCCTGTCCTAGTGCGAGGCACCGTCTCCGCCTCAGATGTGTATAAGAGACAG		i5_v2_105	AATGATACGGCGACCACCGAGATCTACACGGTCTTTCACGGTCGTCGGCAGCGTC
T7_v2_103	GTCTCGTGGGCTCGGCTGTCCCTGTCCGATAGGTTCTCACCGTCTCCGCCTCAGATGTGTATAAGAGACAG		i5_v2_106	AATGATACGGCGACCACCGAGATCTACACCACTGTTCTGCATCGTCGGCAGCGTC
T7_v2_104	GTCTCGTGGGCTCGGCTGTCCCTGTCCTCAACCACTTCACCGTCTCCGCCTCAGATGTGTATAAGAGACAG		i5_v2_107	AATGATACGGCGACCACCGAGATCTACACTCCTCATTCCCATCGTCGGCAGCGTC
T7_v2_105	GTCTCGTGGGCTCGGCTGTCCCTGTCCACGAACTGCTCACCGTCTCCGCCTCAGATGTGTATAAGAGACAG		i5_v2_108	AATGATACGGCGACCACCGAGATCTACACTGGTCCAGTCTATCGTCGGCAGCGTC
T7_v2_106	GTCTCGTGGGCTCGGCTGTCCCTGTCCGCGATAGTCGCACCGTCTCCGCCTCAGATGTGTATAAGAGACAG		i5_v2_109	AATGATACGGCGACCACCGAGATCTACACGTTTCGACTACCTCGTCGGCAGCGTC
T7_v2_107	GTCTCGTGGGCTCGGCTGTCCCTGTCCCGTCCAGGATCACCGTCTCCGCCTCAGATGTGTATAAGAGACAG		i5_v2_110	AATGATACGGCGACCACCGAGATCTACACTGAACCCAGCAGTCGTCGGCAGCGTC
T7_v2_108	GTCTCGTGGGCTCGGCTGTCCCTGTCCCGTTGAGTTGCACCGTCTCCGCCTCAGATGTGTATAAGAGACAG		i5_v2_111	AATGATACGGCGACCACCGAGATCTACACCATTGTCGGTCCTCGTCGGCAGCGTC
T7_v2_109	GTCTCGTGGGCTCGGCTGTCCCTGTCCTGAGGTTCCGCACCGTCTCCGCCTCAGATGTGTATAAGAGACAG		i5_v2_112	AATGATACGGCGACCACCGAGATCTACACAATTACGGACGTTCGTCGGCAGCGTC
T7_v2_110	GTCTCGTGGGCTCGGCTGTCCCTGTCCCGGTAGTTAGCACCGTCTCCGCCTCAGATGTGTATAAGAGACAG		i5_v2_113	AATGATACGGCGACCACCGAGATCTACACGATGACTCAAGTTCGTCGGCAGCGTC
T7_v2_111	GTCTCGTGGGCTCGGCTGTCCCTGTCCGCTTGATCAGCACCGTCTCCGCCTCAGATGTGTATAAGAGACAG		i5_v2_114	AATGATACGGCGACCACCGAGATCTACACCTATCACTGTGATCGTCGGCAGCGTC
T7_v2_112	GTCTCGTGGGCTCGGCTGTCCCTGTCCGCAGGAGAAACACCGTCTCCGCCTCAGATGTGTATAAGAGACAG		i5_v2_115	AATGATACGGCGACCACCGAGATCTACACGAAGCTGTACCCTCGTCGGCAGCGTC
T7_v2_113	GTCTCGTGGGCTCGGCTGTCCCTGTCCAAGTCGACCTCACCGTCTCCGCCTCAGATGTGTATAAGAGACAG		i5_v2_116	AATGATACGGCGACCACCGAGATCTACACTCTCCAGCAGAATCGTCGGCAGCGTC
T7_v2_114	GTCTCGTGGGCTCGGCTGTCCCTGTCCTCTGACCGACCACCGTCTCCGCCTCAGATGTGTATAAGAGACAG		i5_v2_117	AATGATACGGCGACCACCGAGATCTACACACGCTCTACGAGTCGTCGGCAGCGTC
T7_v2_115	GTCTCGTGGGCTCGGCTGTCCCTGTCCACATTGCGTACACCGTCTCCGCCTCAGATGTGTATAAGAGACAG		i5_v2_118	AATGATACGGCGACCACCGAGATCTACACAGTCCCGTCAGATCGTCGGCAGCGTC
T7_v2_116	GTCTCGTGGGCTCGGCTGTCCCTGTCCGTGCAGTACTCACCGTCTCCGCCTCAGATGTGTATAAGAGACAG		i5_v2_119	AATGATACGGCGACCACCGAGATCTACACTGAGCAGGTCTGTCGTCGGCAGCGTC
T7_v2_117	GTCTCGTGGGCTCGGCTGTCCCTGTCCCCGTTTCTTGCACCGTCTCCGCCTCAGATGTGTATAAGAGACAG		i5_v2_120	AATGATACGGCGACCACCGAGATCTACACATATCCAGTGAGTCGTCGGCAGCGTC
T7_v2_118	GTCTCGTGGGCTCGGCTGTCCCTGTCCGTCTGCTGTGCACCGTCTCCGCCTCAGATGTGTATAAGAGACAG		i5_v2_121	AATGATACGGCGACCACCGAGATCTACACCTAACCCTAGTATCGTCGGCAGCGTC
T7_v2_119	GTCTCGTGGGCTCGGCTGTCCCTGTCCCCGTTCGCAACACCGTCTCCGCCTCAGATGTGTATAAGAGACAG		i5_v2_122	AATGATACGGCGACCACCGAGATCTACACTGGTCTTACCTATCGTCGGCAGCGTC
T7_v2_120	GTCTCGTGGGCTCGGCTGTCCCTGTCCAATGCAGGACCACCGTCTCCGCCTCAGATGTGTATAAGAGACAG		i5_v2_123	AATGATACGGCGACCACCGAGATCTACACCAGACTACTGACTCGTCGGCAGCGTC
T7_v2_121	GTCTCGTGGGCTCGGCTGTCCCTGTCCGACTCACAATCACCGTCTCCGCCTCAGATGTGTATAAGAGACAG		i5_v2_124	AATGATACGGCGACCACCGAGATCTACACAGTGCGGATCGTTCGTCGGCAGCGTC
T7_v2_122	GTCTCGTGGGCTCGGCTGTCCCTGTCCGATGTCACAACACCGTCTCCGCCTCAGATGTGTATAAGAGACAG		i5_v2_125	AATGATACGGCGACCACCGAGATCTACACGATCGTCGTCCATCGTCGGCAGCGTC
T7_v2_123	GTCTCGTGGGCTCGGCTGTCCCTGTCCTGACCTACCACACCGTCTCCGCCTCAGATGTGTATAAGAGACAG		i5_v2_126	AATGATACGGCGACCACCGAGATCTACACAGCATATCCAGTTCGTCGGCAGCGTC
T7_v2_124	GTCTCGTGGGCTCGGCTGTCCCTGTCCATGCACGAGACACCGTCTCCGCCTCAGATGTGTATAAGAGACAG		i5_v2_127	AATGATACGGCGACCACCGAGATCTACACATACCGCGTCACTCGTCGGCAGCGTC
T7_v2_125	GTCTCGTGGGCTCGGCTGTCCCTGTCCAGGTCCAATGCACCGTCTCCGCCTCAGATGTGTATAAGAGACAG		i5_v2_128	AATGATACGGCGACCACCGAGATCTACACGTGTGATAAACGTCGTCGGCAGCGTC
T7_v2_126	GTCTCGTGGGCTCGGCTGTCCCTGTCCCTCTCCGAACCACCGTCTCCGCCTCAGATGTGTATAAGAGACAG		i5_v2_129	AATGATACGGCGACCACCGAGATCTACACGATCATTATGCCTCGTCGGCAGCGTC
T7_v2_127	GTCTCGTGGGCTCGGCTGTCCCTGTCCGCTCTCCACTCACCGTCTCCGCCTCAGATGTGTATAAGAGACAG		i5_v2_130	AATGATACGGCGACCACCGAGATCTACACTATCGCCAATCGTCGTCGGCAGCGTC
T7_v2_128	GTCTCGTGGGCTCGGCTGTCCCTGTCCTAGTACCTCTCACCGTCTCCGCCTCAGATGTGTATAAGAGACAG		i5_v2_131	AATGATACGGCGACCACCGAGATCTACACAATTTCACGACGTCGTCGGCAGCGTC
T7_v2_129	GTCTCGTGGGCTCGGCTGTCCCTGTCCATCTGGAGAACACCGTCTCCGCCTCAGATGTGTATAAGAGACAG		i5_v2_132	AATGATACGGCGACCACCGAGATCTACACAGTTTGCGTGGTTCGTCGGCAGCGTC
T7_v2_130	GTCTCGTGGGCTCGGCTGTCCCTGTCCGTCCTCATTCCACCGTCTCCGCCTCAGATGTGTATAAGAGACAG		i5_v2_133	AATGATACGGCGACCACCGAGATCTACACACATCGGCATCTTCGTCGGCAGCGTC
T7_v2_131	GTCTCGTGGGCTCGGCTGTCCCTGTCCAGTTGACTACCACCGTCTCCGCCTCAGATGTGTATAAGAGACAG		i5_v2_134	AATGATACGGCGACCACCGAGATCTACACATTGCCTAACACTCGTCGGCAGCGTC
T7_v2_132	GTCTCGTGGGCTCGGCTGTCCCTGTCCCCTGTACCGACACCGTCTCCGCCTCAGATGTGTATAAGAGACAG		i5_v2_135	AATGATACGGCGACCACCGAGATCTACACGTTGCAGGAAGATCGTCGGCAGCGTC
T7_v2_133	GTCTCGTGGGCTCGGCTGTCCCTGTCCAGGATGTCGCCACCGTCTCCGCCTCAGATGTGTATAAGAGACAG		i5_v2_136	AATGATACGGCGACCACCGAGATCTACACCTCTTTGCTAAGTCGTCGGCAGCGTC
T7_v2_134	GTCTCGTGGGCTCGGCTGTCCCTGTCCAGGCTTCCTTCACCGTCTCCGCCTCAGATGTGTATAAGAGACAG		i5_v2_137	AATGATACGGCGACCACCGAGATCTACACCCGGTGCTGTAATCGTCGGCAGCGTC
T7_v2_135	GTCTCGTGGGCTCGGCTGTCCCTGTCCTTCGCACATACACCGTCTCCGCCTCAGATGTGTATAAGAGACAG		i5_v2_138	AATGATACGGCGACCACCGAGATCTACACGCCAAACGATCTTCGTCGGCAGCGTC
T7_v2_136	GTCTCGTGGGCTCGGCTGTCCCTGTCCCTGGGTCCAACACCGTCTCCGCCTCAGATGTGTATAAGAGACAG		i5_v2_139	AATGATACGGCGACCACCGAGATCTACACCTTGTCCAATCTTCGTCGGCAGCGTC
T7_v2_137	GTCTCGTGGGCTCGGCTGTCCCTGTCCGCATGCCAATCACCGTCTCCGCCTCAGATGTGTATAAGAGACAG		i5_v2_140	AATGATACGGCGACCACCGAGATCTACACGGTTGATTTGTGTCGTCGGCAGCGTC
T7_v2_138	GTCTCGTGGGCTCGGCTGTCCCTGTCCCATAGTGCATCACCGTCTCCGCCTCAGATGTGTATAAGAGACAG		i5_v2_141	AATGATACGGCGACCACCGAGATCTACACGTCTGTTCCTTTTCGTCGGCAGCGTC
T7_v2_139	GTCTCGTGGGCTCGGCTGTCCCTGTCCTCCTTGCCAACACCGTCTCCGCCTCAGATGTGTATAAGAGACAG		i5_v2_142	AATGATACGGCGACCACCGAGATCTACACCATAACACAGTGTCGTCGGCAGCGTC
T7_v2_140	GTCTCGTGGGCTCGGCTGTCCCTGTCCTACGAAAGCCCACCGTCTCCGCCTCAGATGTGTATAAGAGACAG		i5_v2_143	AATGATACGGCGACCACCGAGATCTACACTTGATAGCCAACTCGTCGGCAGCGTC
T7_v2_141	GTCTCGTGGGCTCGGCTGTCCCTGTCCATCTTCTCCACACCGTCTCCGCCTCAGATGTGTATAAGAGACAG		i5_v2_144	AATGATACGGCGACCACCGAGATCTACACAGACTACATGAGTCGTCGGCAGCGTC
T7_v2_142	GTCTCGTGGGCTCGGCTGTCCCTGTCCTCAACCCTGACACCGTCTCCGCCTCAGATGTGTATAAGAGACAG		i5_v2_145	AATGATACGGCGACCACCGAGATCTACACAAAGCGCATGCTTCGTCGGCAGCGTC
T7_v2_143	GTCTCGTGGGCTCGGCTGTCCCTGTCCGCCTAAGCGACACCGTCTCCGCCTCAGATGTGTATAAGAGACAG		i5_v2_146	AATGATACGGCGACCACCGAGATCTACACTAGTAGACCAACTCGTCGGCAGCGTC
T7_v2_144	GTCTCGTGGGCTCGGCTGTCCCTGTCCATCCCTAGTACACCGTCTCCGCCTCAGATGTGTATAAGAGACAG		i5_v2_147	AATGATACGGCGACCACCGAGATCTACACCTATCTGTCGACTCGTCGGCAGCGTC
T7_v2_145	GTCTCGTGGGCTCGGCTGTCCCTGTCCAAGAAGCATCCACCGTCTCCGCCTCAGATGTGTATAAGAGACAG		i5_v2_148	AATGATACGGCGACCACCGAGATCTACACATCGGCGTTCCTTCGTCGGCAGCGTC
T7_v2_146	GTCTCGTGGGCTCGGCTGTCCCTGTCCATCGCTTGATCACCGTCTCCGCCTCAGATGTGTATAAGAGACAG		i5_v2_149	AATGATACGGCGACCACCGAGATCTACACGGTATTCTCCGGTCGTCGGCAGCGTC
T7_v2_147	GTCTCGTGGGCTCGGCTGTCCCTGTCCGGTCCTATACCACCGTCTCCGCCTCAGATGTGTATAAGAGACAG		i5_v2_150	AATGATACGGCGACCACCGAGATCTACACAACTTGGGCTGATCGTCGGCAGCGTC
T7_v2_148	GTCTCGTGGGCTCGGCTGTCCCTGTCCCGTAGTAGCCCACCGTCTCCGCCTCAGATGTGTATAAGAGACAG		i5_v2_151	AATGATACGGCGACCACCGAGATCTACACAGCCTCAATGATTCGTCGGCAGCGTC
T7_v2_149	GTCTCGTGGGCTCGGCTGTCCCTGTCCAAGCGCCAAACACCGTCTCCGCCTCAGATGTGTATAAGAGACAG		i5_v2_152	AATGATACGGCGACCACCGAGATCTACACGTGCGTTAGCTTTCGTCGGCAGCGTC
T7_v2_150	GTCTCGTGGGCTCGGCTGTCCCTGTCCATCACGGATTCACCGTCTCCGCCTCAGATGTGTATAAGAGACAG		i5_v2_153	AATGATACGGCGACCACCGAGATCTACACCTTCGCGTTTAATCGTCGGCAGCGTC
T7_v2_151	GTCTCGTGGGCTCGGCTGTCCCTGTCCAAGATCGGAGCACCGTCTCCGCCTCAGATGTGTATAAGAGACAG		i5_v2_154	AATGATACGGCGACCACCGAGATCTACACCAGAGAAGCTAATCGTCGGCAGCGTC
T7_v2_152	GTCTCGTGGGCTCGGCTGTCCCTGTCCACGTGTTTGCCACCGTCTCCGCCTCAGATGTGTATAAGAGACAG		i5_v2_155	AATGATACGGCGACCACCGAGATCTACACGTTGCTACCTAATCGTCGGCAGCGTC
T7_v2_153	GTCTCGTGGGCTCGGCTGTCCCTGTCCGGCCCAATTACACCGTCTCCGCCTCAGATGTGTATAAGAGACAG		i5_v2_156	AATGATACGGCGACCACCGAGATCTACACCTCAGGATTAGGTCGTCGGCAGCGTC
T7_v2_154	GTCTCGTGGGCTCGGCTGTCCCTGTCCTTGTCTGGGCCACCGTCTCCGCCTCAGATGTGTATAAGAGACAG		i5_v2_157	AATGATACGGCGACCACCGAGATCTACACGTAATGCCGCCTTCGTCGGCAGCGTC
T7_v2_155	GTCTCGTGGGCTCGGCTGTCCCTGTCCTCCCAAGTCACACCGTCTCCGCCTCAGATGTGTATAAGAGACAG		i5_v2_158	AATGATACGGCGACCACCGAGATCTACACGTAGTGATGCTCTCGTCGGCAGCGTC
T7_v2_156	GTCTCGTGGGCTCGGCTGTCCCTGTCCAAACCATCGGCACCGTCTCCGCCTCAGATGTGTATAAGAGACAG		i5_v2_159	AATGATACGGCGACCACCGAGATCTACACACGACATTGCACTCGTCGGCAGCGTC
T7_v2_157	GTCTCGTGGGCTCGGCTGTCCCTGTCCACCCTACTGGCACCGTCTCCGCCTCAGATGTGTATAAGAGACAG		i5_v2_160	AATGATACGGCGACCACCGAGATCTACACAAGTCATCACCGTCGTCGGCAGCGTC
T7_v2_158	GTCTCGTGGGCTCGGCTGTCCCTGTCCACTCCCGTCACACCGTCTCCGCCTCAGATGTGTATAAGAGACAG		i5_v2_161	AATGATACGGCGACCACCGAGATCTACACCATAAGGCGTCGTCGTCGGCAGCGTC
T7_v2_159	GTCTCGTGGGCTCGGCTGTCCCTGTCCGGAGCTACTCCACCGTCTCCGCCTCAGATGTGTATAAGAGACAG		i5_v2_162	AATGATACGGCGACCACCGAGATCTACACCCTTCTTGTTTGTCGTCGGCAGCGTC
T7_v2_160	GTCTCGTGGGCTCGGCTGTCCCTGTCCCCTATGCAACCACCGTCTCCGCCTCAGATGTGTATAAGAGACAG		i5_v2_163	AATGATACGGCGACCACCGAGATCTACACCACAGAATCACATCGTCGGCAGCGTC
T7_v2_161	GTCTCGTGGGCTCGGCTGTCCCTGTCCCTTCCTCAGCCACCGTCTCCGCCTCAGATGTGTATAAGAGACAG		i5_v2_164	AATGATACGGCGACCACCGAGATCTACACGAGCCATCCTATTCGTCGGCAGCGTC
T7_v2_162	GTCTCGTGGGCTCGGCTGTCCCTGTCCCGGTGCTCATCACCGTCTCCGCCTCAGATGTGTATAAGAGACAG		i5_v2_165	AATGATACGGCGACCACCGAGATCTACACAGGGTCCAGTACTCGTCGGCAGCGTC
T7_v2_163	GTCTCGTGGGCTCGGCTGTCCCTGTCCCGATACCATTCACCGTCTCCGCCTCAGATGTGTATAAGAGACAG		i5_v2_166	AATGATACGGCGACCACCGAGATCTACACCGGGAAGTAACATCGTCGGCAGCGTC
T7_v2_164	GTCTCGTGGGCTCGGCTGTCCCTGTCCGGATGAGGTACACCGTCTCCGCCTCAGATGTGTATAAGAGACAG		i5_v2_167	AATGATACGGCGACCACCGAGATCTACACTTCTCTCTCTGCTCGTCGGCAGCGTC
T7_v2_165	GTCTCGTGGGCTCGGCTGTCCCTGTCCCATGTTCTCTCACCGTCTCCGCCTCAGATGTGTATAAGAGACAG		i5_v2_168	AATGATACGGCGACCACCGAGATCTACACTTTGATGCCATCTCGTCGGCAGCGTC
T7_v2_166	GTCTCGTGGGCTCGGCTGTCCCTGTCCTGTTCTGTGTCACCGTCTCCGCCTCAGATGTGTATAAGAGACAG		i5_v2_169	AATGATACGGCGACCACCGAGATCTACACCCCGCCCTAAATTCGTCGGCAGCGTC
T7_v2_167	GTCTCGTGGGCTCGGCTGTCCCTGTCCAGCTCTCGTTCACCGTCTCCGCCTCAGATGTGTATAAGAGACAG		i5_v2_170	AATGATACGGCGACCACCGAGATCTACACAACACCCGCAAGTCGTCGGCAGCGTC
T7_v2_168	GTCTCGTGGGCTCGGCTGTCCCTGTCCCATACTCTTGCACCGTCTCCGCCTCAGATGTGTATAAGAGACAG		i5_v2_171	AATGATACGGCGACCACCGAGATCTACACGATACGGAAAGGTCGTCGGCAGCGTC
T7_v2_169	GTCTCGTGGGCTCGGCTGTCCCTGTCCTGGCTTCACCCACCGTCTCCGCCTCAGATGTGTATAAGAGACAG		i5_v2_172	AATGATACGGCGACCACCGAGATCTACACAGCTCCCGCTTTTCGTCGGCAGCGTC
T7_v2_170	GTCTCGTGGGCTCGGCTGTCCCTGTCCTATGCACGGACACCGTCTCCGCCTCAGATGTGTATAAGAGACAG		i5_v2_173	AATGATACGGCGACCACCGAGATCTACACTGCTAGCACTAATCGTCGGCAGCGTC
T7_v2_171	GTCTCGTGGGCTCGGCTGTCCCTGTCCGGTTGCCTGACACCGTCTCCGCCTCAGATGTGTATAAGAGACAG		i5_v2_174	AATGATACGGCGACCACCGAGATCTACACCCGAACATTTAGTCGTCGGCAGCGTC
T7_v2_172	GTCTCGTGGGCTCGGCTGTCCCTGTCCACGGTGTGTGCACCGTCTCCGCCTCAGATGTGTATAAGAGACAG		i5_v2_175	AATGATACGGCGACCACCGAGATCTACACGTCGATCTTGGGTCGTCGGCAGCGTC
T7_v2_173	GTCTCGTGGGCTCGGCTGTCCCTGTCCAGTCAAGTGACACCGTCTCCGCCTCAGATGTGTATAAGAGACAG		i5_v2_176	AATGATACGGCGACCACCGAGATCTACACGGTCAACCACTCTCGTCGGCAGCGTC
T7_v2_174	GTCTCGTGGGCTCGGCTGTCCCTGTCCGTACGAGTAGCACCGTCTCCGCCTCAGATGTGTATAAGAGACAG		i5_v2_177	AATGATACGGCGACCACCGAGATCTACACATATCAGCGGAATCGTCGGCAGCGTC
T7_v2_175	GTCTCGTGGGCTCGGCTGTCCCTGTCCCCCGTGTAAACACCGTCTCCGCCTCAGATGTGTATAAGAGACAG		i5_v2_178	AATGATACGGCGACCACCGAGATCTACACTGTTAGTCGCCGTCGTCGGCAGCGTC
T7_v2_176	GTCTCGTGGGCTCGGCTGTCCCTGTCCGCGATCCTAACACCGTCTCCGCCTCAGATGTGTATAAGAGACAG		i5_v2_179	AATGATACGGCGACCACCGAGATCTACACCTAATGTGCCCATCGTCGGCAGCGTC
T7_v2_177	GTCTCGTGGGCTCGGCTGTCCCTGTCCCAGCTCTCACCACCGTCTCCGCCTCAGATGTGTATAAGAGACAG		i5_v2_180	AATGATACGGCGACCACCGAGATCTACACGCAACGGAAACATCGTCGGCAGCGTC
T7_v2_178	GTCTCGTGGGCTCGGCTGTCCCTGTCCGGTCAATCCCCACCGTCTCCGCCTCAGATGTGTATAAGAGACAG		i5_v2_181	AATGATACGGCGACCACCGAGATCTACACACTGCCGAAAGGTCGTCGGCAGCGTC
T7_v2_179	GTCTCGTGGGCTCGGCTGTCCCTGTCCCTTTGCCTCTCACCGTCTCCGCCTCAGATGTGTATAAGAGACAG		i5_v2_182	AATGATACGGCGACCACCGAGATCTACACTCATTAGCGGTTTCGTCGGCAGCGTC
T7_v2_180	GTCTCGTGGGCTCGGCTGTCCCTGTCCATAGGCACTGCACCGTCTCCGCCTCAGATGTGTATAAGAGACAG		i5_v2_183	AATGATACGGCGACCACCGAGATCTACACACGCTACCTAAGTCGTCGGCAGCGTC
T7_v2_181	GTCTCGTGGGCTCGGCTGTCCCTGTCCAACTTCCTCGCACCGTCTCCGCCTCAGATGTGTATAAGAGACAG		i5_v2_184	AATGATACGGCGACCACCGAGATCTACACGTATCAGGTGGCTCGTCGGCAGCGTC
T7_v2_182	GTCTCGTGGGCTCGGCTGTCCCTGTCCCTTATCGTCCCACCGTCTCCGCCTCAGATGTGTATAAGAGACAG		i5_v2_185	AATGATACGGCGACCACCGAGATCTACACAGGTCCTTCTGTTCGTCGGCAGCGTC
T7_v2_183	GTCTCGTGGGCTCGGCTGTCCCTGTCCGGGATCTATACACCGTCTCCGCCTCAGATGTGTATAAGAGACAG		i5_v2_186	AATGATACGGCGACCACCGAGATCTACACGAACCGGGTATGTCGTCGGCAGCGTC
T7_v2_184	GTCTCGTGGGCTCGGCTGTCCCTGTCCGCAAGTACGGCACCGTCTCCGCCTCAGATGTGTATAAGAGACAG		i5_v2_187	AATGATACGGCGACCACCGAGATCTACACGCTTTCCGTACTTCGTCGGCAGCGTC
T7_v2_185	GTCTCGTGGGCTCGGCTGTCCCTGTCCGATTGAGCCTCACCGTCTCCGCCTCAGATGTGTATAAGAGACAG		i5_v2_188	AATGATACGGCGACCACCGAGATCTACACGACGGCTTGGATTCGTCGGCAGCGTC
T7_v2_186	GTCTCGTGGGCTCGGCTGTCCCTGTCCTAAGGAGACTCACCGTCTCCGCCTCAGATGTGTATAAGAGACAG		i5_v2_189	AATGATACGGCGACCACCGAGATCTACACTCCCAGAGATGGTCGTCGGCAGCGTC
T7_v2_187	GTCTCGTGGGCTCGGCTGTCCCTGTCCGATCTAAACGCACCGTCTCCGCCTCAGATGTGTATAAGAGACAG		i5_v2_190	AATGATACGGCGACCACCGAGATCTACACAGACATCACCAATCGTCGGCAGCGTC
T7_v2_188	GTCTCGTGGGCTCGGCTGTCCCTGTCCAAGTCTGACCCACCGTCTCCGCCTCAGATGTGTATAAGAGACAG		i5_v2_191	AATGATACGGCGACCACCGAGATCTACACATAGGCAGCAAGTCGTCGGCAGCGTC
T7_v2_189	GTCTCGTGGGCTCGGCTGTCCCTGTCCCCGTCTTGAACACCGTCTCCGCCTCAGATGTGTATAAGAGACAG		i5_v2_192	AATGATACGGCGACCACCGAGATCTACACCCTGGGATGGTATCGTCGGCAGCGTC
T7_v2_190	GTCTCGTGGGCTCGGCTGTCCCTGTCCGGTACAAGTCCACCGTCTCCGCCTCAGATGTGTATAAGAGACAG		i5_v2_193	AATGATACGGCGACCACCGAGATCTACACTATAGCAGGGCGTCGTCGGCAGCGTC
T7_v2_191	GTCTCGTGGGCTCGGCTGTCCCTGTCCGTACACAGTTCACCGTCTCCGCCTCAGATGTGTATAAGAGACAG		i5_v2_194	AATGATACGGCGACCACCGAGATCTACACTGCCACTACAGGTCGTCGGCAGCGTC
T7_v2_192	GTCTCGTGGGCTCGGCTGTCCCTGTCCGTCCACTTGACACCGTCTCCGCCTCAGATGTGTATAAGAGACAG		i5_v2_195	AATGATACGGCGACCACCGAGATCTACACCCTTCCGGCAAATCGTCGGCAGCGTC
T7_v2_193	GTCTCGTGGGCTCGGCTGTCCCTGTCCTAGGTTATGCCACCGTCTCCGCCTCAGATGTGTATAAGAGACAG		i5_v2_196	AATGATACGGCGACCACCGAGATCTACACCCTACCAATAGCTCGTCGGCAGCGTC
T7_v2_194	GTCTCGTGGGCTCGGCTGTCCCTGTCCCGCCGACTAACACCGTCTCCGCCTCAGATGTGTATAAGAGACAG		i5_v2_197	AATGATACGGCGACCACCGAGATCTACACTATGCCACACTCTCGTCGGCAGCGTC
T7_v2_195	GTCTCGTGGGCTCGGCTGTCCCTGTCCAGCCAGCACACACCGTCTCCGCCTCAGATGTGTATAAGAGACAG		i5_v2_198	AATGATACGGCGACCACCGAGATCTACACTCGGGTAAGCGTTCGTCGGCAGCGTC
T7_v2_196	GTCTCGTGGGCTCGGCTGTCCCTGTCCTGAAGCGAAACACCGTCTCCGCCTCAGATGTGTATAAGAGACAG		i5_v2_199	AATGATACGGCGACCACCGAGATCTACACTAGGCGACTGAATCGTCGGCAGCGTC
T7_v2_197	GTCTCGTGGGCTCGGCTGTCCCTGTCCCCGAACGCTTCACCGTCTCCGCCTCAGATGTGTATAAGAGACAG		i5_v2_200	AATGATACGGCGACCACCGAGATCTACACCTCATGCCGTTGTCGTCGGCAGCGTC
T7_v2_198	GTCTCGTGGGCTCGGCTGTCCCTGTCCCGCGCAAATTCACCGTCTCCGCCTCAGATGTGTATAAGAGACAG		i5_v2_201	AATGATACGGCGACCACCGAGATCTACACTTGACTGACACTTCGTCGGCAGCGTC
T7_v2_199	GTCTCGTGGGCTCGGCTGTCCCTGTCCTGGTAATCGACACCGTCTCCGCCTCAGATGTGTATAAGAGACAG		i5_v2_202	AATGATACGGCGACCACCGAGATCTACACATGCCGGAATCGTCGTCGGCAGCGTC
T7_v2_200	GTCTCGTGGGCTCGGCTGTCCCTGTCCTAACTTCAGGCACCGTCTCCGCCTCAGATGTGTATAAGAGACAG		i5_v2_203	AATGATACGGCGACCACCGAGATCTACACCAGAAACAATCCTCGTCGGCAGCGTC
T7_v2_201	GTCTCGTGGGCTCGGCTGTCCCTGTCCGACGTCAAGGCACCGTCTCCGCCTCAGATGTGTATAAGAGACAG		i5_v2_204	AATGATACGGCGACCACCGAGATCTACACACGTGTTCGATTTCGTCGGCAGCGTC
T7_v2_202	GTCTCGTGGGCTCGGCTGTCCCTGTCCTTGAAGAGGTCACCGTCTCCGCCTCAGATGTGTATAAGAGACAG		i5_v2_205	AATGATACGGCGACCACCGAGATCTACACATCGAACCTTCGTCGTCGGCAGCGTC
T7_v2_203	GTCTCGTGGGCTCGGCTGTCCCTGTCCATCGAACTTGCACCGTCTCCGCCTCAGATGTGTATAAGAGACAG		i5_v2_206	AATGATACGGCGACCACCGAGATCTACACCATCCAGCGATTTCGTCGGCAGCGTC
T7_v2_204	GTCTCGTGGGCTCGGCTGTCCCTGTCCTCTACGGCTGCACCGTCTCCGCCTCAGATGTGTATAAGAGACAG		i5_v2_207	AATGATACGGCGACCACCGAGATCTACACGGTGAGCAAGTTTCGTCGGCAGCGTC
T7_v2_205	GTCTCGTGGGCTCGGCTGTCCCTGTCCCCAAAGGGACCACCGTCTCCGCCTCAGATGTGTATAAGAGACAG		i5_v2_208	AATGATACGGCGACCACCGAGATCTACACACGATTGGCGCATCGTCGGCAGCGTC
T7_v2_206	GTCTCGTGGGCTCGGCTGTCCCTGTCCGTGACGAAATCACCGTCTCCGCCTCAGATGTGTATAAGAGACAG		i5_v2_209	AATGATACGGCGACCACCGAGATCTACACCCCATTCGCAACTCGTCGGCAGCGTC
T7_v2_207	GTCTCGTGGGCTCGGCTGTCCCTGTCCGCTTGCGTTTCACCGTCTCCGCCTCAGATGTGTATAAGAGACAG		i5_v2_210	AATGATACGGCGACCACCGAGATCTACACATGATCCCTTCGTCGTCGGCAGCGTC
T7_v2_208	GTCTCGTGGGCTCGGCTGTCCCTGTCCGAGAATAGGCCACCGTCTCCGCCTCAGATGTGTATAAGAGACAG		i5_v2_211	AATGATACGGCGACCACCGAGATCTACACACGATCCAGCAATCGTCGGCAGCGTC
T7_v2_209	GTCTCGTGGGCTCGGCTGTCCCTGTCCAGTGACGTACCACCGTCTCCGCCTCAGATGTGTATAAGAGACAG		i5_v2_212	AATGATACGGCGACCACCGAGATCTACACATGTTTGCCATCTCGTCGGCAGCGTC
T7_v2_210	GTCTCGTGGGCTCGGCTGTCCCTGTCCTACAGGCCTGCACCGTCTCCGCCTCAGATGTGTATAAGAGACAG		i5_v2_213	AATGATACGGCGACCACCGAGATCTACACAACGGGACGTTTTCGTCGGCAGCGTC
T7_v2_211	GTCTCGTGGGCTCGGCTGTCCCTGTCCGGAGCCGATACACCGTCTCCGCCTCAGATGTGTATAAGAGACAG		i5_v2_214	AATGATACGGCGACCACCGAGATCTACACGGATAAGCGCAGTCGTCGGCAGCGTC
T7_v2_212	GTCTCGTGGGCTCGGCTGTCCCTGTCCAACCTGAGGACACCGTCTCCGCCTCAGATGTGTATAAGAGACAG		i5_v2_215	AATGATACGGCGACCACCGAGATCTACACCCACGCTGACTATCGTCGGCAGCGTC
T7_v2_213	GTCTCGTGGGCTCGGCTGTCCCTGTCCGTTGAACGGCCACCGTCTCCGCCTCAGATGTGTATAAGAGACAG		i5_v2_216	AATGATACGGCGACCACCGAGATCTACACCGGATGGGATAGTCGTCGGCAGCGTC
T7_v2_214	GTCTCGTGGGCTCGGCTGTCCCTGTCCCACCACCACTCACCGTCTCCGCCTCAGATGTGTATAAGAGACAG		i5_v2_217	AATGATACGGCGACCACCGAGATCTACACAGCACGGCATGTTCGTCGGCAGCGTC
T7_v2_215	GTCTCGTGGGCTCGGCTGTCCCTGTCCGTGCAACAAGCACCGTCTCCGCCTCAGATGTGTATAAGAGACAG		i5_v2_218	AATGATACGGCGACCACCGAGATCTACACACGTCATTAGCATCGTCGGCAGCGTC
T7_v2_216	GTCTCGTGGGCTCGGCTGTCCCTGTCCGGCGTCGTATCACCGTCTCCGCCTCAGATGTGTATAAGAGACAG		i5_v2_219	AATGATACGGCGACCACCGAGATCTACACTACCCGCCTGTTTCGTCGGCAGCGTC
T7_v2_217	GTCTCGTGGGCTCGGCTGTCCCTGTCCCAGGAATAGACACCGTCTCCGCCTCAGATGTGTATAAGAGACAG		i5_v2_220	AATGATACGGCGACCACCGAGATCTACACGCAGCCTCTCTATCGTCGGCAGCGTC
T7_v2_218	GTCTCGTGGGCTCGGCTGTCCCTGTCCCGAGGATGTTCACCGTCTCCGCCTCAGATGTGTATAAGAGACAG		i5_v2_221	AATGATACGGCGACCACCGAGATCTACACAGGAGAGTGTGCTCGTCGGCAGCGTC
T7_v2_219	GTCTCGTGGGCTCGGCTGTCCCTGTCCAAACCGAGACCACCGTCTCCGCCTCAGATGTGTATAAGAGACAG		i5_v2_222	AATGATACGGCGACCACCGAGATCTACACGTCACGGATCTGTCGTCGGCAGCGTC
T7_v2_220	GTCTCGTGGGCTCGGCTGTCCCTGTCCATGTTGCTAGCACCGTCTCCGCCTCAGATGTGTATAAGAGACAG		i5_v2_223	AATGATACGGCGACCACCGAGATCTACACGAACCTTACGGATCGTCGGCAGCGTC
T7_v2_221	GTCTCGTGGGCTCGGCTGTCCCTGTCCGCACAGACGACACCGTCTCCGCCTCAGATGTGTATAAGAGACAG		i5_v2_224	AATGATACGGCGACCACCGAGATCTACACCCCACTACCTAATCGTCGGCAGCGTC
T7_v2_222	GTCTCGTGGGCTCGGCTGTCCCTGTCCGAGCTAGATCCACCGTCTCCGCCTCAGATGTGTATAAGAGACAG		i5_v2_225	AATGATACGGCGACCACCGAGATCTACACCGGACCTATATTTCGTCGGCAGCGTC
T7_v2_223	GTCTCGTGGGCTCGGCTGTCCCTGTCCTGGACTGTAACACCGTCTCCGCCTCAGATGTGTATAAGAGACAG		i5_v2_226	AATGATACGGCGACCACCGAGATCTACACGATGGTGAGGCTTCGTCGGCAGCGTC
T7_v2_224	GTCTCGTGGGCTCGGCTGTCCCTGTCCCTTCGCTTGGCACCGTCTCCGCCTCAGATGTGTATAAGAGACAG		i5_v2_227	AATGATACGGCGACCACCGAGATCTACACGATGGAACAACCTCGTCGGCAGCGTC
T7_v2_225	GTCTCGTGGGCTCGGCTGTCCCTGTCCACAGTACGATCACCGTCTCCGCCTCAGATGTGTATAAGAGACAG		i5_v2_228	AATGATACGGCGACCACCGAGATCTACACATCCGGGCTCAATCGTCGGCAGCGTC
T7_v2_226	GTCTCGTGGGCTCGGCTGTCCCTGTCCAACACTGCGGCACCGTCTCCGCCTCAGATGTGTATAAGAGACAG		i5_v2_229	AATGATACGGCGACCACCGAGATCTACACCAGTACTATCTCTCGTCGGCAGCGTC
T7_v2_227	GTCTCGTGGGCTCGGCTGTCCCTGTCCTCTGACGTCTCACCGTCTCCGCCTCAGATGTGTATAAGAGACAG		i5_v2_230	AATGATACGGCGACCACCGAGATCTACACTAGGGCTAGTTTTCGTCGGCAGCGTC
T7_v2_228	GTCTCGTGGGCTCGGCTGTCCCTGTCCACCGAATAGTCACCGTCTCCGCCTCAGATGTGTATAAGAGACAG		i5_v2_231	AATGATACGGCGACCACCGAGATCTACACATGGTTACTCCATCGTCGGCAGCGTC
T7_v2_229	GTCTCGTGGGCTCGGCTGTCCCTGTCCCCATCTCTGCCACCGTCTCCGCCTCAGATGTGTATAAGAGACAG		i5_v2_232	AATGATACGGCGACCACCGAGATCTACACACAGGTCTGGTCTCGTCGGCAGCGTC
T7_v2_230	GTCTCGTGGGCTCGGCTGTCCCTGTCCGAGGTCCCTTCACCGTCTCCGCCTCAGATGTGTATAAGAGACAG		i5_v2_233	AATGATACGGCGACCACCGAGATCTACACGCAATCACCCTCTCGTCGGCAGCGTC
T7_v2_231	GTCTCGTGGGCTCGGCTGTCCCTGTCCGGCGGATTTCCACCGTCTCCGCCTCAGATGTGTATAAGAGACAG		i5_v2_234	AATGATACGGCGACCACCGAGATCTACACATTGGCTCAGCGTCGTCGGCAGCGTC
T7_v2_232	GTCTCGTGGGCTCGGCTGTCCCTGTCCGATCAACTTGCACCGTCTCCGCCTCAGATGTGTATAAGAGACAG		i5_v2_235	AATGATACGGCGACCACCGAGATCTACACAGTGGGCTCTAATCGTCGGCAGCGTC
T7_v2_233	GTCTCGTGGGCTCGGCTGTCCCTGTCCCATGCGTGCACACCGTCTCCGCCTCAGATGTGTATAAGAGACAG		i5_v2_236	AATGATACGGCGACCACCGAGATCTACACCGCAACAGAATTTCGTCGGCAGCGTC
T7_v2_234	GTCTCGTGGGCTCGGCTGTCCCTGTCCGACCTAACGCCACCGTCTCCGCCTCAGATGTGTATAAGAGACAG		i5_v2_237	AATGATACGGCGACCACCGAGATCTACACGACGTAGATGAGTCGTCGGCAGCGTC
T7_v2_235	GTCTCGTGGGCTCGGCTGTCCCTGTCCCCGACAGAAACACCGTCTCCGCCTCAGATGTGTATAAGAGACAG		i5_v2_238	AATGATACGGCGACCACCGAGATCTACACGGAATTAGTCCCTCGTCGGCAGCGTC
T7_v2_236	GTCTCGTGGGCTCGGCTGTCCCTGTCCGTTCAGGCAACACCGTCTCCGCCTCAGATGTGTATAAGAGACAG		i5_v2_239	AATGATACGGCGACCACCGAGATCTACACCTGGTCGAAGTTTCGTCGGCAGCGTC
T7_v2_237	GTCTCGTGGGCTCGGCTGTCCCTGTCCTAGTCTTCTGCACCGTCTCCGCCTCAGATGTGTATAAGAGACAG		i5_v2_240	AATGATACGGCGACCACCGAGATCTACACTTCCGGATATACTCGTCGGCAGCGTC
T7_v2_238	GTCTCGTGGGCTCGGCTGTCCCTGTCCTTTACCACAGCACCGTCTCCGCCTCAGATGTGTATAAGAGACAG		i5_v2_241	AATGATACGGCGACCACCGAGATCTACACAGTTGCTCGGAATCGTCGGCAGCGTC
T7_v2_239	GTCTCGTGGGCTCGGCTGTCCCTGTCCACTGTAGTGCCACCGTCTCCGCCTCAGATGTGTATAAGAGACAG		i5_v2_242	AATGATACGGCGACCACCGAGATCTACACATCAACACGGGCTCGTCGGCAGCGTC
T7_v2_240	GTCTCGTGGGCTCGGCTGTCCCTGTCCAGATTTAGGGCACCGTCTCCGCCTCAGATGTGTATAAGAGACAG		i5_v2_243	AATGATACGGCGACCACCGAGATCTACACGTTGAGACGGCATCGTCGGCAGCGTC
T7_v2_241	GTCTCGTGGGCTCGGCTGTCCCTGTCCATACTGGCGCCACCGTCTCCGCCTCAGATGTGTATAAGAGACAG		i5_v2_244	AATGATACGGCGACCACCGAGATCTACACTACCCGGCGATATCGTCGGCAGCGTC
T7_v2_242	GTCTCGTGGGCTCGGCTGTCCCTGTCCGTACCACGACCACCGTCTCCGCCTCAGATGTGTATAAGAGACAG		i5_v2_245	AATGATACGGCGACCACCGAGATCTACACACACGCTATGACTCGTCGGCAGCGTC
T7_v2_243	GTCTCGTGGGCTCGGCTGTCCCTGTCCCCAGAGCTAACACCGTCTCCGCCTCAGATGTGTATAAGAGACAG		i5_v2_246	AATGATACGGCGACCACCGAGATCTACACTCGTATAGCGCGTCGTCGGCAGCGTC
T7_v2_244	GTCTCGTGGGCTCGGCTGTCCCTGTCCCACCTTCGCACACCGTCTCCGCCTCAGATGTGTATAAGAGACAG		i5_v2_247	AATGATACGGCGACCACCGAGATCTACACAGTGCACTTGCATCGTCGGCAGCGTC
T7_v2_245	GTCTCGTGGGCTCGGCTGTCCCTGTCCTGGATACCCACACCGTCTCCGCCTCAGATGTGTATAAGAGACAG		i5_v2_248	AATGATACGGCGACCACCGAGATCTACACATGGCGTGCAGTTCGTCGGCAGCGTC
T7_v2_246	GTCTCGTGGGCTCGGCTGTCCCTGTCCGGCGAGTGAACACCGTCTCCGCCTCAGATGTGTATAAGAGACAG		i5_v2_249	AATGATACGGCGACCACCGAGATCTACACAGGTCTTCGCTGTCGTCGGCAGCGTC
T7_v2_247	GTCTCGTGGGCTCGGCTGTCCCTGTCCGGGTAGATCTCACCGTCTCCGCCTCAGATGTGTATAAGAGACAG		i5_v2_250	AATGATACGGCGACCACCGAGATCTACACGTGCCTATGCGTTCGTCGGCAGCGTC
T7_v2_248	GTCTCGTGGGCTCGGCTGTCCCTGTCCACCACATGAACACCGTCTCCGCCTCAGATGTGTATAAGAGACAG		i5_v2_251	AATGATACGGCGACCACCGAGATCTACACCGTCATCGAAATTCGTCGGCAGCGTC
T7_v2_249	GTCTCGTGGGCTCGGCTGTCCCTGTCCTAGATGCAAGCACCGTCTCCGCCTCAGATGTGTATAAGAGACAG		i5_v2_252	AATGATACGGCGACCACCGAGATCTACACTCAAGCCCGCTTTCGTCGGCAGCGTC
T7_v2_250	GTCTCGTGGGCTCGGCTGTCCCTGTCCTAAAGTCTGCCACCGTCTCCGCCTCAGATGTGTATAAGAGACAG		i5_v2_253	AATGATACGGCGACCACCGAGATCTACACGCCTAAGTCACATCGTCGGCAGCGTC
T7_v2_251	GTCTCGTGGGCTCGGCTGTCCCTGTCCACCTGCCATGCACCGTCTCCGCCTCAGATGTGTATAAGAGACAG		i5_v2_254	AATGATACGGCGACCACCGAGATCTACACCCTTCTTCGAAATCGTCGGCAGCGTC
T7_v2_252	GTCTCGTGGGCTCGGCTGTCCCTGTCCACCAAGGCCACACCGTCTCCGCCTCAGATGTGTATAAGAGACAG		i5_v2_255	AATGATACGGCGACCACCGAGATCTACACGGTACACTAATGTCGTCGGCAGCGTC
T7_v2_253	GTCTCGTGGGCTCGGCTGTCCCTGTCCATCGAGACAGCACCGTCTCCGCCTCAGATGTGTATAAGAGACAG		i5_v2_256	AATGATACGGCGACCACCGAGATCTACACTCCATCTGCCTATCGTCGGCAGCGTC
T7_v2_254	GTCTCGTGGGCTCGGCTGTCCCTGTCCCAAATCCTCACACCGTCTCCGCCTCAGATGTGTATAAGAGACAG		i5_v2_257	AATGATACGGCGACCACCGAGATCTACACACGGAAAGCTGGTCGTCGGCAGCGTC
T7_v2_255	GTCTCGTGGGCTCGGCTGTCCCTGTCCCTAGTGTTCCCACCGTCTCCGCCTCAGATGTGTATAAGAGACAG		i5_v2_258	AATGATACGGCGACCACCGAGATCTACACAGGGCAAGTTACTCGTCGGCAGCGTC
T7_v2_256	GTCTCGTGGGCTCGGCTGTCCCTGTCCTCCAGAAATCCACCGTCTCCGCCTCAGATGTGTATAAGAGACAG		i5_v2_259	AATGATACGGCGACCACCGAGATCTACACGATAGTTGATCCTCGTCGGCAGCGTC
T7_v2_257	GTCTCGTGGGCTCGGCTGTCCCTGTCCAGAGCTGAATCACCGTCTCCGCCTCAGATGTGTATAAGAGACAG		i5_v2_260	AATGATACGGCGACCACCGAGATCTACACTATCCAAGTGGATCGTCGGCAGCGTC
T7_v2_258	GTCTCGTGGGCTCGGCTGTCCCTGTCCGTTACGGGCTCACCGTCTCCGCCTCAGATGTGTATAAGAGACAG		i5_v2_261	AATGATACGGCGACCACCGAGATCTACACCTAACGATCGCATCGTCGGCAGCGTC
T7_v2_259	GTCTCGTGGGCTCGGCTGTCCCTGTCCGAAACCTATGCACCGTCTCCGCCTCAGATGTGTATAAGAGACAG		i5_v2_262	AATGATACGGCGACCACCGAGATCTACACTTTGGACCGGACTCGTCGGCAGCGTC
T7_v2_260	GTCTCGTGGGCTCGGCTGTCCCTGTCCAAATGGTAGCCACCGTCTCCGCCTCAGATGTGTATAAGAGACAG		i5_v2_263	AATGATACGGCGACCACCGAGATCTACACGCACAATAACGCTCGTCGGCAGCGTC
T7_v2_261	GTCTCGTGGGCTCGGCTGTCCCTGTCCTGCATTGCCTCACCGTCTCCGCCTCAGATGTGTATAAGAGACAG		i5_v2_264	AATGATACGGCGACCACCGAGATCTACACCGAGCAGTCGTTTCGTCGGCAGCGTC
T7_v2_262	GTCTCGTGGGCTCGGCTGTCCCTGTCCTTGGAGGAGGCACCGTCTCCGCCTCAGATGTGTATAAGAGACAG		i5_v2_265	AATGATACGGCGACCACCGAGATCTACACCATATGACGCTATCGTCGGCAGCGTC
T7_v2_263	GTCTCGTGGGCTCGGCTGTCCCTGTCCTACCGATACCCACCGTCTCCGCCTCAGATGTGTATAAGAGACAG		i5_v2_266	AATGATACGGCGACCACCGAGATCTACACAACTAGAAGTCCTCGTCGGCAGCGTC
T7_v2_264	GTCTCGTGGGCTCGGCTGTCCCTGTCCTCGTAGATTGCACCGTCTCCGCCTCAGATGTGTATAAGAGACAG		i5_v2_267	AATGATACGGCGACCACCGAGATCTACACATACTGCCAGGGTCGTCGGCAGCGTC
T7_v2_265	GTCTCGTGGGCTCGGCTGTCCCTGTCCAAGGCATCTTCACCGTCTCCGCCTCAGATGTGTATAAGAGACAG		i5_v2_268	AATGATACGGCGACCACCGAGATCTACACCAGTGATGTGGATCGTCGGCAGCGTC
T7_v2_266	GTCTCGTGGGCTCGGCTGTCCCTGTCCCTGTCACCAGCACCGTCTCCGCCTCAGATGTGTATAAGAGACAG		i5_v2_269	AATGATACGGCGACCACCGAGATCTACACTACGATGGTTCATCGTCGGCAGCGTC
T7_v2_267	GTCTCGTGGGCTCGGCTGTCCCTGTCCAATCGTTGGCCACCGTCTCCGCCTCAGATGTGTATAAGAGACAG		i5_v2_270	AATGATACGGCGACCACCGAGATCTACACGTCTAGGTGGACTCGTCGGCAGCGTC
T7_v2_268	GTCTCGTGGGCTCGGCTGTCCCTGTCCTGAGCGCAACCACCGTCTCCGCCTCAGATGTGTATAAGAGACAG		i5_v2_271	AATGATACGGCGACCACCGAGATCTACACAGCCTGAGGTTCTCGTCGGCAGCGTC
T7_v2_269	GTCTCGTGGGCTCGGCTGTCCCTGTCCTTGAACCTTCCACCGTCTCCGCCTCAGATGTGTATAAGAGACAG		i5_v2_272	AATGATACGGCGACCACCGAGATCTACACTCTCCAGATGGGTCGTCGGCAGCGTC
T7_v2_270	GTCTCGTGGGCTCGGCTGTCCCTGTCCTTCGGGAATTCACCGTCTCCGCCTCAGATGTGTATAAGAGACAG		i5_v2_273	AATGATACGGCGACCACCGAGATCTACACATCCTACTGATCTCGTCGGCAGCGTC
T7_v2_271	GTCTCGTGGGCTCGGCTGTCCCTGTCCGGAACGCCTTCACCGTCTCCGCCTCAGATGTGTATAAGAGACAG		i5_v2_274	AATGATACGGCGACCACCGAGATCTACACACAACCGACACCTCGTCGGCAGCGTC
T7_v2_272	GTCTCGTGGGCTCGGCTGTCCCTGTCCTTCGGAGTGGCACCGTCTCCGCCTCAGATGTGTATAAGAGACAG		i5_v2_275	AATGATACGGCGACCACCGAGATCTACACGGCTTCAATAGGTCGTCGGCAGCGTC
T7_v2_273	GTCTCGTGGGCTCGGCTGTCCCTGTCCGAATAGTCCCCACCGTCTCCGCCTCAGATGTGTATAAGAGACAG		i5_v2_276	AATGATACGGCGACCACCGAGATCTACACTGCACGCGAATCTCGTCGGCAGCGTC
T7_v2_274	GTCTCGTGGGCTCGGCTGTCCCTGTCCATTCATTCCGCACCGTCTCCGCCTCAGATGTGTATAAGAGACAG		i5_v2_277	AATGATACGGCGACCACCGAGATCTACACGCGCTTCATGTTTCGTCGGCAGCGTC
T7_v2_275	GTCTCGTGGGCTCGGCTGTCCCTGTCCCAGGGTAAATCACCGTCTCCGCCTCAGATGTGTATAAGAGACAG		i5_v2_278	AATGATACGGCGACCACCGAGATCTACACTCCGAGGGTAACTCGTCGGCAGCGTC
T7_v2_276	GTCTCGTGGGCTCGGCTGTCCCTGTCCTCATCAGAAGCACCGTCTCCGCCTCAGATGTGTATAAGAGACAG		i5_v2_279	AATGATACGGCGACCACCGAGATCTACACTACCTCATCACGTCGTCGGCAGCGTC
T7_v2_277	GTCTCGTGGGCTCGGCTGTCCCTGTCCCGTCAGTAGCCACCGTCTCCGCCTCAGATGTGTATAAGAGACAG		i5_v2_280	AATGATACGGCGACCACCGAGATCTACACTTAGTCTCCAACTCGTCGGCAGCGTC
T7_v2_278	GTCTCGTGGGCTCGGCTGTCCCTGTCCTTATCGATCGCACCGTCTCCGCCTCAGATGTGTATAAGAGACAG		i5_v2_281	AATGATACGGCGACCACCGAGATCTACACGATCTCTCGTCGTCGTCGGCAGCGTC
T7_v2_279	GTCTCGTGGGCTCGGCTGTCCCTGTCCCGGCATTGTGCACCGTCTCCGCCTCAGATGTGTATAAGAGACAG		i5_v2_282	AATGATACGGCGACCACCGAGATCTACACGAATATCCCGCCTCGTCGGCAGCGTC
T7_v2_280	GTCTCGTGGGCTCGGCTGTCCCTGTCCTCAGCGATTACACCGTCTCCGCCTCAGATGTGTATAAGAGACAG		i5_v2_283	AATGATACGGCGACCACCGAGATCTACACGACTACTTAAGGTCGTCGGCAGCGTC
T7_v2_281	GTCTCGTGGGCTCGGCTGTCCCTGTCCGCTACGACACCACCGTCTCCGCCTCAGATGTGTATAAGAGACAG		i5_v2_284	AATGATACGGCGACCACCGAGATCTACACTACGGAGGCTATTCGTCGGCAGCGTC
T7_v2_282	GTCTCGTGGGCTCGGCTGTCCCTGTCCTCAAGGCACTCACCGTCTCCGCCTCAGATGTGTATAAGAGACAG		i5_v2_285	AATGATACGGCGACCACCGAGATCTACACTAGAAGTACGCCTCGTCGGCAGCGTC
T7_v2_283	GTCTCGTGGGCTCGGCTGTCCCTGTCCGCGGAGTATACACCGTCTCCGCCTCAGATGTGTATAAGAGACAG		i5_v2_286	AATGATACGGCGACCACCGAGATCTACACGACCTAGAGTGGTCGTCGGCAGCGTC
T7_v2_284	GTCTCGTGGGCTCGGCTGTCCCTGTCCCCCACGATTGCACCGTCTCCGCCTCAGATGTGTATAAGAGACAG		i5_v2_287	AATGATACGGCGACCACCGAGATCTACACCTGGCTGAAAGCTCGTCGGCAGCGTC
T7_v2_285	GTCTCGTGGGCTCGGCTGTCCCTGTCCCAGTTGAGCGCACCGTCTCCGCCTCAGATGTGTATAAGAGACAG		i5_v2_288	AATGATACGGCGACCACCGAGATCTACACGACATGTTCATCTCGTCGGCAGCGTC
T7_v2_286	GTCTCGTGGGCTCGGCTGTCCCTGTCCTTCGAGCGCACACCGTCTCCGCCTCAGATGTGTATAAGAGACAG		i5_v2_289	AATGATACGGCGACCACCGAGATCTACACAGCTAGCTTAGGTCGTCGGCAGCGTC
T7_v2_287	GTCTCGTGGGCTCGGCTGTCCCTGTCCCCCAAACCATCACCGTCTCCGCCTCAGATGTGTATAAGAGACAG		i5_v2_290	AATGATACGGCGACCACCGAGATCTACACTATACGGCCACCTCGTCGGCAGCGTC
T7_v2_288	GTCTCGTGGGCTCGGCTGTCCCTGTCCTCGCTGTACACACCGTCTCCGCCTCAGATGTGTATAAGAGACAG		i5_v2_291	AATGATACGGCGACCACCGAGATCTACACCCGTGATTCCTCTCGTCGGCAGCGTC
T7_v2_289	GTCTCGTGGGCTCGGCTGTCCCTGTCCCATATCGAGGCACCGTCTCCGCCTCAGATGTGTATAAGAGACAG		i5_v2_292	AATGATACGGCGACCACCGAGATCTACACTTTACCGTGCGCTCGTCGGCAGCGTC
T7_v2_290	GTCTCGTGGGCTCGGCTGTCCCTGTCCGCTATCATTGCACCGTCTCCGCCTCAGATGTGTATAAGAGACAG		i5_v2_293	AATGATACGGCGACCACCGAGATCTACACCCTAAGAACTTCTCGTCGGCAGCGTC
T7_v2_291	GTCTCGTGGGCTCGGCTGTCCCTGTCCAGAAGCAAGTCACCGTCTCCGCCTCAGATGTGTATAAGAGACAG		i5_v2_294	AATGATACGGCGACCACCGAGATCTACACAAGCATGTGGGTTCGTCGGCAGCGTC
T7_v2_292	GTCTCGTGGGCTCGGCTGTCCCTGTCCACACGTCGTTCACCGTCTCCGCCTCAGATGTGTATAAGAGACAG		i5_v2_295	AATGATACGGCGACCACCGAGATCTACACTAGAGGCCAAATTCGTCGGCAGCGTC
T7_v2_293	GTCTCGTGGGCTCGGCTGTCCCTGTCCTCGGAGGGATCACCGTCTCCGCCTCAGATGTGTATAAGAGACAG		i5_v2_296	AATGATACGGCGACCACCGAGATCTACACCTGTCAAATGTCTCGTCGGCAGCGTC
T7_v2_294	GTCTCGTGGGCTCGGCTGTCCCTGTCCCAACACTGGCCACCGTCTCCGCCTCAGATGTGTATAAGAGACAG		i5_v2_297	AATGATACGGCGACCACCGAGATCTACACGTCGCTGTGTCATCGTCGGCAGCGTC
T7_v2_295	GTCTCGTGGGCTCGGCTGTCCCTGTCCCAACTTCCTCCACCGTCTCCGCCTCAGATGTGTATAAGAGACAG		i5_v2_298	AATGATACGGCGACCACCGAGATCTACACGAATCCGTCCCTTCGTCGGCAGCGTC
T7_v2_296	GTCTCGTGGGCTCGGCTGTCCCTGTCCGACTTTGCTTCACCGTCTCCGCCTCAGATGTGTATAAGAGACAG		i5_v2_299	AATGATACGGCGACCACCGAGATCTACACCCTAATTAGACCTCGTCGGCAGCGTC
T7_v2_297	GTCTCGTGGGCTCGGCTGTCCCTGTCCAATGCGAAGCCACCGTCTCCGCCTCAGATGTGTATAAGAGACAG		i5_v2_300	AATGATACGGCGACCACCGAGATCTACACGCTAGCTAAGGCTCGTCGGCAGCGTC
T7_v2_298	GTCTCGTGGGCTCGGCTGTCCCTGTCCTGAGTAGCGGCACCGTCTCCGCCTCAGATGTGTATAAGAGACAG		i5_v2_301	AATGATACGGCGACCACCGAGATCTACACTCAGGTGATCCGTCGTCGGCAGCGTC
T7_v2_299	GTCTCGTGGGCTCGGCTGTCCCTGTCCAACCACACTCCACCGTCTCCGCCTCAGATGTGTATAAGAGACAG		i5_v2_302	AATGATACGGCGACCACCGAGATCTACACGTCGTACATCGCTCGTCGGCAGCGTC
T7_v2_300	GTCTCGTGGGCTCGGCTGTCCCTGTCCGCCATACATACACCGTCTCCGCCTCAGATGTGTATAAGAGACAG		i5_v2_303	AATGATACGGCGACCACCGAGATCTACACAGTACCAGGACTTCGTCGGCAGCGTC
T7_v2_301	GTCTCGTGGGCTCGGCTGTCCCTGTCCTTCCAAGAGCCACCGTCTCCGCCTCAGATGTGTATAAGAGACAG		i5_v2_304	AATGATACGGCGACCACCGAGATCTACACCGGCGAGATTTGTCGTCGGCAGCGTC
T7_v2_302	GTCTCGTGGGCTCGGCTGTCCCTGTCCAGGGTCACACCACCGTCTCCGCCTCAGATGTGTATAAGAGACAG		i5_v2_305	AATGATACGGCGACCACCGAGATCTACACTTCTCTTCACAGTCGTCGGCAGCGTC
T7_v2_303	GTCTCGTGGGCTCGGCTGTCCCTGTCCAGGAGAGAACCACCGTCTCCGCCTCAGATGTGTATAAGAGACAG		i5_v2_306	AATGATACGGCGACCACCGAGATCTACACAAGGCACTGTTATCGTCGGCAGCGTC
T7_v2_304	GTCTCGTGGGCTCGGCTGTCCCTGTCCGCTTGAAGGTCACCGTCTCCGCCTCAGATGTGTATAAGAGACAG		i5_v2_307	AATGATACGGCGACCACCGAGATCTACACGACAGCAGGAAGTCGTCGGCAGCGTC
T7_v2_305	GTCTCGTGGGCTCGGCTGTCCCTGTCCTGCCACCCTACACCGTCTCCGCCTCAGATGTGTATAAGAGACAG		i5_v2_308	AATGATACGGCGACCACCGAGATCTACACCCCGACTAAGGATCGTCGGCAGCGTC
T7_v2_306	GTCTCGTGGGCTCGGCTGTCCCTGTCCGAGGGTTTGTCACCGTCTCCGCCTCAGATGTGTATAAGAGACAG		i5_v2_309	AATGATACGGCGACCACCGAGATCTACACAGATAGTGGGTTTCGTCGGCAGCGTC
T7_v2_307	GTCTCGTGGGCTCGGCTGTCCCTGTCCTTGGGCAACGCACCGTCTCCGCCTCAGATGTGTATAAGAGACAG		i5_v2_310	AATGATACGGCGACCACCGAGATCTACACGCAGGCATTAGATCGTCGGCAGCGTC
T7_v2_308	GTCTCGTGGGCTCGGCTGTCCCTGTCCGCACAAGCTTCACCGTCTCCGCCTCAGATGTGTATAAGAGACAG		i5_v2_311	AATGATACGGCGACCACCGAGATCTACACTGTCCTGAGCTGTCGTCGGCAGCGTC
T7_v2_309	GTCTCGTGGGCTCGGCTGTCCCTGTCCCTGAGTAAGGCACCGTCTCCGCCTCAGATGTGTATAAGAGACAG		i5_v2_312	AATGATACGGCGACCACCGAGATCTACACTCGTAACGTCGCTCGTCGGCAGCGTC
T7_v2_310	GTCTCGTGGGCTCGGCTGTCCCTGTCCGAAGATCAGCCACCGTCTCCGCCTCAGATGTGTATAAGAGACAG		i5_v2_313	AATGATACGGCGACCACCGAGATCTACACCTACGTAGTGAATCGTCGGCAGCGTC
T7_v2_311	GTCTCGTGGGCTCGGCTGTCCCTGTCCGTCGGACGAACACCGTCTCCGCCTCAGATGTGTATAAGAGACAG		i5_v2_314	AATGATACGGCGACCACCGAGATCTACACGAGCTTCGACACTCGTCGGCAGCGTC
T7_v2_312	GTCTCGTGGGCTCGGCTGTCCCTGTCCTCCTACCAGCCACCGTCTCCGCCTCAGATGTGTATAAGAGACAG		i5_v2_315	AATGATACGGCGACCACCGAGATCTACACTCAAATACGCCCTCGTCGGCAGCGTC
T7_v2_313	GTCTCGTGGGCTCGGCTGTCCCTGTCCATTGCTGCCACACCGTCTCCGCCTCAGATGTGTATAAGAGACAG		i5_v2_316	AATGATACGGCGACCACCGAGATCTACACTTAAGCCGCGGATCGTCGGCAGCGTC
T7_v2_314	GTCTCGTGGGCTCGGCTGTCCCTGTCCCCCTATGGCTCACCGTCTCCGCCTCAGATGTGTATAAGAGACAG		i5_v2_317	AATGATACGGCGACCACCGAGATCTACACAGCGGGCTACTTTCGTCGGCAGCGTC
T7_v2_315	GTCTCGTGGGCTCGGCTGTCCCTGTCCTGGCAACCACCACCGTCTCCGCCTCAGATGTGTATAAGAGACAG		i5_v2_318	AATGATACGGCGACCACCGAGATCTACACCGTCGAGGACAATCGTCGGCAGCGTC
T7_v2_316	GTCTCGTGGGCTCGGCTGTCCCTGTCCAGTGGTGCTCCACCGTCTCCGCCTCAGATGTGTATAAGAGACAG		i5_v2_319	AATGATACGGCGACCACCGAGATCTACACCGATCAGGTTCATCGTCGGCAGCGTC
T7_v2_317	GTCTCGTGGGCTCGGCTGTCCCTGTCCGACTGTGAAGCACCGTCTCCGCCTCAGATGTGTATAAGAGACAG		i5_v2_320	AATGATACGGCGACCACCGAGATCTACACAGTGGACCTCTCTCGTCGGCAGCGTC
T7_v2_318	GTCTCGTGGGCTCGGCTGTCCCTGTCCCTAAGGACTTCACCGTCTCCGCCTCAGATGTGTATAAGAGACAG		i5_v2_321	AATGATACGGCGACCACCGAGATCTACACCGCTAGTGCTTTTCGTCGGCAGCGTC
T7_v2_319	GTCTCGTGGGCTCGGCTGTCCCTGTCCTACTCGCTCACACCGTCTCCGCCTCAGATGTGTATAAGAGACAG		i5_v2_322	AATGATACGGCGACCACCGAGATCTACACCGGGATTACTTATCGTCGGCAGCGTC
T7_v2_320	GTCTCGTGGGCTCGGCTGTCCCTGTCCCCTGGTTGAGCACCGTCTCCGCCTCAGATGTGTATAAGAGACAG		i5_v2_323	AATGATACGGCGACCACCGAGATCTACACCATCGGGTTGTATCGTCGGCAGCGTC
T7_v2_321	GTCTCGTGGGCTCGGCTGTCCCTGTCCTGCTTTCCTGCACCGTCTCCGCCTCAGATGTGTATAAGAGACAG		i5_v2_324	AATGATACGGCGACCACCGAGATCTACACTTCCAACACTCCTCGTCGGCAGCGTC
T7_v2_322	GTCTCGTGGGCTCGGCTGTCCCTGTCCGACAGCACTACACCGTCTCCGCCTCAGATGTGTATAAGAGACAG		i5_v2_325	AATGATACGGCGACCACCGAGATCTACACTACTGGTTACGCTCGTCGGCAGCGTC
T7_v2_323	GTCTCGTGGGCTCGGCTGTCCCTGTCCTCCGTGGATGCACCGTCTCCGCCTCAGATGTGTATAAGAGACAG		i5_v2_326	AATGATACGGCGACCACCGAGATCTACACCTTCGTTTAGGCTCGTCGGCAGCGTC
T7_v2_324	GTCTCGTGGGCTCGGCTGTCCCTGTCCTCGTCCTCCACACCGTCTCCGCCTCAGATGTGTATAAGAGACAG		i5_v2_327	AATGATACGGCGACCACCGAGATCTACACAACGGGTACGATTCGTCGGCAGCGTC
T7_v2_325	GTCTCGTGGGCTCGGCTGTCCCTGTCCAGAGCAACGACACCGTCTCCGCCTCAGATGTGTATAAGAGACAG		i5_v2_328	AATGATACGGCGACCACCGAGATCTACACCGTCGATTCTCGTCGTCGGCAGCGTC
T7_v2_326	GTCTCGTGGGCTCGGCTGTCCCTGTCCAATAAGCCGACACCGTCTCCGCCTCAGATGTGTATAAGAGACAG		i5_v2_329	AATGATACGGCGACCACCGAGATCTACACGTAGCACAACTTTCGTCGGCAGCGTC
T7_v2_327	GTCTCGTGGGCTCGGCTGTCCCTGTCCCCCTGGTCTACACCGTCTCCGCCTCAGATGTGTATAAGAGACAG		i5_v2_330	AATGATACGGCGACCACCGAGATCTACACGTAACAGGCTACTCGTCGGCAGCGTC
T7_v2_328	GTCTCGTGGGCTCGGCTGTCCCTGTCCCACGCGAAAGCACCGTCTCCGCCTCAGATGTGTATAAGAGACAG		i5_v2_331	AATGATACGGCGACCACCGAGATCTACACTGTACCGAAACATCGTCGGCAGCGTC
T7_v2_329	GTCTCGTGGGCTCGGCTGTCCCTGTCCGAATCGAGTACACCGTCTCCGCCTCAGATGTGTATAAGAGACAG		i5_v2_332	AATGATACGGCGACCACCGAGATCTACACAGTGGTTTGCACTCGTCGGCAGCGTC
T7_v2_330	GTCTCGTGGGCTCGGCTGTCCCTGTCCCTGGACATAGCACCGTCTCCGCCTCAGATGTGTATAAGAGACAG		i5_v2_333	AATGATACGGCGACCACCGAGATCTACACGGATCTATGTACTCGTCGGCAGCGTC
T7_v2_331	GTCTCGTGGGCTCGGCTGTCCCTGTCCAGATAAGGGTCACCGTCTCCGCCTCAGATGTGTATAAGAGACAG		i5_v2_334	AATGATACGGCGACCACCGAGATCTACACTTCTGAAAGAGCTCGTCGGCAGCGTC
T7_v2_332	GTCTCGTGGGCTCGGCTGTCCCTGTCCGTTTATCCCTCACCGTCTCCGCCTCAGATGTGTATAAGAGACAG		i5_v2_335	AATGATACGGCGACCACCGAGATCTACACACGTTTATGCCCTCGTCGGCAGCGTC
T7_v2_333	GTCTCGTGGGCTCGGCTGTCCCTGTCCAGATTACCTCCACCGTCTCCGCCTCAGATGTGTATAAGAGACAG		i5_v2_336	AATGATACGGCGACCACCGAGATCTACACTTGTGTTGCACGTCGTCGGCAGCGTC
T7_v2_334	GTCTCGTGGGCTCGGCTGTCCCTGTCCGGTTCACCTGCACCGTCTCCGCCTCAGATGTGTATAAGAGACAG		i5_v2_337	AATGATACGGCGACCACCGAGATCTACACGCATCGATGCTATCGTCGGCAGCGTC
T7_v2_335	GTCTCGTGGGCTCGGCTGTCCCTGTCCGAATTTGTGGCACCGTCTCCGCCTCAGATGTGTATAAGAGACAG		i5_v2_338	AATGATACGGCGACCACCGAGATCTACACTTGGTAGCACGCTCGTCGGCAGCGTC
T7_v2_336	GTCTCGTGGGCTCGGCTGTCCCTGTCCCTGCGAACACCACCGTCTCCGCCTCAGATGTGTATAAGAGACAG		i5_v2_339	AATGATACGGCGACCACCGAGATCTACACCAGGTCGTCTAGTCGTCGGCAGCGTC
T7_v2_337	GTCTCGTGGGCTCGGCTGTCCCTGTCCTACATCACACCACCGTCTCCGCCTCAGATGTGTATAAGAGACAG		i5_v2_340	AATGATACGGCGACCACCGAGATCTACACGTCTACGTTCGCTCGTCGGCAGCGTC
T7_v2_338	GTCTCGTGGGCTCGGCTGTCCCTGTCCAGGATTGGTCCACCGTCTCCGCCTCAGATGTGTATAAGAGACAG		i5_v2_341	AATGATACGGCGACCACCGAGATCTACACTGATTTGCCCTTTCGTCGGCAGCGTC
T7_v2_339	GTCTCGTGGGCTCGGCTGTCCCTGTCCTGCGCTACGTCACCGTCTCCGCCTCAGATGTGTATAAGAGACAG		i5_v2_342	AATGATACGGCGACCACCGAGATCTACACAATTTCCGGAGCTCGTCGGCAGCGTC
T7_v2_340	GTCTCGTGGGCTCGGCTGTCCCTGTCCATCACCTTGGCACCGTCTCCGCCTCAGATGTGTATAAGAGACAG		i5_v2_343	AATGATACGGCGACCACCGAGATCTACACTTCTCGGCATACTCGTCGGCAGCGTC
T7_v2_341	GTCTCGTGGGCTCGGCTGTCCCTGTCCTCACCCGATCCACCGTCTCCGCCTCAGATGTGTATAAGAGACAG		i5_v2_344	AATGATACGGCGACCACCGAGATCTACACGCGCAGTTAAAGTCGTCGGCAGCGTC
T7_v2_342	GTCTCGTGGGCTCGGCTGTCCCTGTCCCGGCCTCTTACACCGTCTCCGCCTCAGATGTGTATAAGAGACAG		i5_v2_345	AATGATACGGCGACCACCGAGATCTACACTCAGCTACGCATTCGTCGGCAGCGTC
T7_v2_343	GTCTCGTGGGCTCGGCTGTCCCTGTCCGAAATCCCGGCACCGTCTCCGCCTCAGATGTGTATAAGAGACAG		i5_v2_346	AATGATACGGCGACCACCGAGATCTACACGCTACACCTATCTCGTCGGCAGCGTC
T7_v2_344	GTCTCGTGGGCTCGGCTGTCCCTGTCCTAGCGTCGGACACCGTCTCCGCCTCAGATGTGTATAAGAGACAG		i5_v2_347	AATGATACGGCGACCACCGAGATCTACACAACTTGATCCGGTCGTCGGCAGCGTC
T7_v2_345	GTCTCGTGGGCTCGGCTGTCCCTGTCCCAATGGCTCCCACCGTCTCCGCCTCAGATGTGTATAAGAGACAG		i5_v2_348	AATGATACGGCGACCACCGAGATCTACACGCACCGGCTTTATCGTCGGCAGCGTC
T7_v2_346	GTCTCGTGGGCTCGGCTGTCCCTGTCCGGCAACAAGACACCGTCTCCGCCTCAGATGTGTATAAGAGACAG		i5_v2_349	AATGATACGGCGACCACCGAGATCTACACCGCTTTCCCTGATCGTCGGCAGCGTC
T7_v2_347	GTCTCGTGGGCTCGGCTGTCCCTGTCCCAGAGATGCGCACCGTCTCCGCCTCAGATGTGTATAAGAGACAG		i5_v2_350	AATGATACGGCGACCACCGAGATCTACACTTGATGAGGATGTCGTCGGCAGCGTC
T7_v2_348	GTCTCGTGGGCTCGGCTGTCCCTGTCCAACATAGGCCCACCGTCTCCGCCTCAGATGTGTATAAGAGACAG		i5_v2_351	AATGATACGGCGACCACCGAGATCTACACTACTACGACTTCTCGTCGGCAGCGTC
T7_v2_349	GTCTCGTGGGCTCGGCTGTCCCTGTCCCATCAAGGTCCACCGTCTCCGCCTCAGATGTGTATAAGAGACAG		i5_v2_352	AATGATACGGCGACCACCGAGATCTACACGGCTTGCCATGTTCGTCGGCAGCGTC
T7_v2_350	GTCTCGTGGGCTCGGCTGTCCCTGTCCCTCTCTGTGACACCGTCTCCGCCTCAGATGTGTATAAGAGACAG		i5_v2_353	AATGATACGGCGACCACCGAGATCTACACGGATTGCGTTCATCGTCGGCAGCGTC
T7_v2_351	GTCTCGTGGGCTCGGCTGTCCCTGTCCAGTCCAGACGCACCGTCTCCGCCTCAGATGTGTATAAGAGACAG		i5_v2_354	AATGATACGGCGACCACCGAGATCTACACTACCTTGCACCTTCGTCGGCAGCGTC
T7_v2_352	GTCTCGTGGGCTCGGCTGTCCCTGTCCAGTCTGGGTGCACCGTCTCCGCCTCAGATGTGTATAAGAGACAG		i5_v2_355	AATGATACGGCGACCACCGAGATCTACACTTACCACTGCCCTCGTCGGCAGCGTC
T7_v2_353	GTCTCGTGGGCTCGGCTGTCCCTGTCCAGGCAAATAGCACCGTCTCCGCCTCAGATGTGTATAAGAGACAG		i5_v2_356	AATGATACGGCGACCACCGAGATCTACACATGACCGTACGTTCGTCGGCAGCGTC
T7_v2_354	GTCTCGTGGGCTCGGCTGTCCCTGTCCTTTGGTCGTTCACCGTCTCCGCCTCAGATGTGTATAAGAGACAG		i5_v2_357	AATGATACGGCGACCACCGAGATCTACACTATGGTTAGGGATCGTCGGCAGCGTC
T7_v2_355	GTCTCGTGGGCTCGGCTGTCCCTGTCCCGTAAAGGCGCACCGTCTCCGCCTCAGATGTGTATAAGAGACAG		i5_v2_358	AATGATACGGCGACCACCGAGATCTACACACGACGCAAAGCTCGTCGGCAGCGTC
T7_v2_356	GTCTCGTGGGCTCGGCTGTCCCTGTCCTATTGCCCACCACCGTCTCCGCCTCAGATGTGTATAAGAGACAG		i5_v2_359	AATGATACGGCGACCACCGAGATCTACACGAGACGATGAGTTCGTCGGCAGCGTC
T7_v2_357	GTCTCGTGGGCTCGGCTGTCCCTGTCCGTCAAGTCTACACCGTCTCCGCCTCAGATGTGTATAAGAGACAG		i5_v2_360	AATGATACGGCGACCACCGAGATCTACACGAGACCGGATGTTCGTCGGCAGCGTC
T7_v2_358	GTCTCGTGGGCTCGGCTGTCCCTGTCCCGCGTAATCACACCGTCTCCGCCTCAGATGTGTATAAGAGACAG		i5_v2_361	AATGATACGGCGACCACCGAGATCTACACTGGAGGTGTGGATCGTCGGCAGCGTC
T7_v2_359	GTCTCGTGGGCTCGGCTGTCCCTGTCCGTATGTCACCCACCGTCTCCGCCTCAGATGTGTATAAGAGACAG		i5_v2_362	AATGATACGGCGACCACCGAGATCTACACCTTTGTCGCAGTTCGTCGGCAGCGTC
T7_v2_360	GTCTCGTGGGCTCGGCTGTCCCTGTCCGTTCCGGATGCACCGTCTCCGCCTCAGATGTGTATAAGAGACAG		i5_v2_363	AATGATACGGCGACCACCGAGATCTACACGCTAGTACCTACTCGTCGGCAGCGTC
T7_v2_361	GTCTCGTGGGCTCGGCTGTCCCTGTCCTAAGGGTGAACACCGTCTCCGCCTCAGATGTGTATAAGAGACAG		i5_v2_364	AATGATACGGCGACCACCGAGATCTACACGGTACCACCTATTCGTCGGCAGCGTC
T7_v2_362	GTCTCGTGGGCTCGGCTGTCCCTGTCCTTTGAGGGTCCACCGTCTCCGCCTCAGATGTGTATAAGAGACAG		i5_v2_365	AATGATACGGCGACCACCGAGATCTACACAACAGCCGTGGTTCGTCGGCAGCGTC
T7_v2_363	GTCTCGTGGGCTCGGCTGTCCCTGTCCGGAGCATTGTCACCGTCTCCGCCTCAGATGTGTATAAGAGACAG		i5_v2_366	AATGATACGGCGACCACCGAGATCTACACCTCTGCATGCCTTCGTCGGCAGCGTC
T7_v2_364	GTCTCGTGGGCTCGGCTGTCCCTGTCCGTCGTTACATCACCGTCTCCGCCTCAGATGTGTATAAGAGACAG		i5_v2_367	AATGATACGGCGACCACCGAGATCTACACTGACCTTCGGTGTCGTCGGCAGCGTC
T7_v2_365	GTCTCGTGGGCTCGGCTGTCCCTGTCCTACGATCCCTCACCGTCTCCGCCTCAGATGTGTATAAGAGACAG		i5_v2_368	AATGATACGGCGACCACCGAGATCTACACTTCGAGTGAGGTTCGTCGGCAGCGTC
T7_v2_366	GTCTCGTGGGCTCGGCTGTCCCTGTCCCTGCTTGACGCACCGTCTCCGCCTCAGATGTGTATAAGAGACAG		i5_v2_369	AATGATACGGCGACCACCGAGATCTACACTCAAAGGCCTAGTCGTCGGCAGCGTC
T7_v2_367	GTCTCGTGGGCTCGGCTGTCCCTGTCCTTACCTGCATCACCGTCTCCGCCTCAGATGTGTATAAGAGACAG		i5_v2_370	AATGATACGGCGACCACCGAGATCTACACTCCTCCTAGTCTTCGTCGGCAGCGTC
T7_v2_368	GTCTCGTGGGCTCGGCTGTCCCTGTCCATGACACGCTCACCGTCTCCGCCTCAGATGTGTATAAGAGACAG		i5_v2_371	AATGATACGGCGACCACCGAGATCTACACGAGGGTCCCTAATCGTCGGCAGCGTC
T7_v2_369	GTCTCGTGGGCTCGGCTGTCCCTGTCCCGACGTGTGACACCGTCTCCGCCTCAGATGTGTATAAGAGACAG		i5_v2_372	AATGATACGGCGACCACCGAGATCTACACCCAGAGAGAACATCGTCGGCAGCGTC
T7_v2_370	GTCTCGTGGGCTCGGCTGTCCCTGTCCCTCACAGCCTCACCGTCTCCGCCTCAGATGTGTATAAGAGACAG		i5_v2_373	AATGATACGGCGACCACCGAGATCTACACAACTAGCCCAATTCGTCGGCAGCGTC
T7_v2_371	GTCTCGTGGGCTCGGCTGTCCCTGTCCCCCTACCTTACACCGTCTCCGCCTCAGATGTGTATAAGAGACAG		i5_v2_374	AATGATACGGCGACCACCGAGATCTACACGTCCATCGGAGTTCGTCGGCAGCGTC
T7_v2_372	GTCTCGTGGGCTCGGCTGTCCCTGTCCCACGTTCATGCACCGTCTCCGCCTCAGATGTGTATAAGAGACAG		i5_v2_375	AATGATACGGCGACCACCGAGATCTACACAAGAGGCCCTGTTCGTCGGCAGCGTC
T7_v2_373	GTCTCGTGGGCTCGGCTGTCCCTGTCCACAAGATACGCACCGTCTCCGCCTCAGATGTGTATAAGAGACAG		i5_v2_376	AATGATACGGCGACCACCGAGATCTACACCCTAAATGCTGATCGTCGGCAGCGTC
T7_v2_374	GTCTCGTGGGCTCGGCTGTCCCTGTCCGACTTGCTGTCACCGTCTCCGCCTCAGATGTGTATAAGAGACAG		i5_v2_377	AATGATACGGCGACCACCGAGATCTACACACCGCGTTACACTCGTCGGCAGCGTC
T7_v2_375	GTCTCGTGGGCTCGGCTGTCCCTGTCCAGAGAACCAGCACCGTCTCCGCCTCAGATGTGTATAAGAGACAG		i5_v2_378	AATGATACGGCGACCACCGAGATCTACACAACAACCTTCTGTCGTCGGCAGCGTC
T7_v2_376	GTCTCGTGGGCTCGGCTGTCCCTGTCCGCGGTTGACACACCGTCTCCGCCTCAGATGTGTATAAGAGACAG		i5_v2_379	AATGATACGGCGACCACCGAGATCTACACGAACACCGATTCTCGTCGGCAGCGTC
T7_v2_377	GTCTCGTGGGCTCGGCTGTCCCTGTCCCCGCCTTTCTCACCGTCTCCGCCTCAGATGTGTATAAGAGACAG		i5_v2_380	AATGATACGGCGACCACCGAGATCTACACTCAAGCTGATTCTCGTCGGCAGCGTC
T7_v2_378	GTCTCGTGGGCTCGGCTGTCCCTGTCCAGGTACGGTACACCGTCTCCGCCTCAGATGTGTATAAGAGACAG		i5_v2_381	AATGATACGGCGACCACCGAGATCTACACCACATCAACGCATCGTCGGCAGCGTC
T7_v2_379	GTCTCGTGGGCTCGGCTGTCCCTGTCCTCGGAATTCCCACCGTCTCCGCCTCAGATGTGTATAAGAGACAG		i5_v2_382	AATGATACGGCGACCACCGAGATCTACACACGATCGTCCATTCGTCGGCAGCGTC
T7_v2_380	GTCTCGTGGGCTCGGCTGTCCCTGTCCATGCGGATTTCACCGTCTCCGCCTCAGATGTGTATAAGAGACAG		i5_v2_383	AATGATACGGCGACCACCGAGATCTACACGGACATATAAGGTCGTCGGCAGCGTC
T7_v2_381	GTCTCGTGGGCTCGGCTGTCCCTGTCCACGTGAACATCACCGTCTCCGCCTCAGATGTGTATAAGAGACAG		i5_v2_384	AATGATACGGCGACCACCGAGATCTACACAAGCGCGGGATTTCGTCGGCAGCGTC
T7_v2_382	GTCTCGTGGGCTCGGCTGTCCCTGTCCAAGCGAGTATCACCGTCTCCGCCTCAGATGTGTATAAGAGACAG		i5_v2_385	AATGATACGGCGACCACCGAGATCTACACGAACATACGGTGTCGTCGGCAGCGTC
T7_v2_383	GTCTCGTGGGCTCGGCTGTCCCTGTCCACGGGTGTTGCACCGTCTCCGCCTCAGATGTGTATAAGAGACAG		i5_v2_386	AATGATACGGCGACCACCGAGATCTACACTGCAAATGCCTCTCGTCGGCAGCGTC
T7_v2_384	GTCTCGTGGGCTCGGCTGTCCCTGTCCGCAACACTAGCACCGTCTCCGCCTCAGATGTGTATAAGAGACAG		i5_v2_387	AATGATACGGCGACCACCGAGATCTACACGTGAAGATGTACTCGTCGGCAGCGTC
			i5_v2_388	AATGATACGGCGACCACCGAGATCTACACGCAGCTAATCCCTCGTCGGCAGCGTC
			i5_v2_389	AATGATACGGCGACCACCGAGATCTACACTAGGTTCAACCCTCGTCGGCAGCGTC
			i5_v2_390	AATGATACGGCGACCACCGAGATCTACACCTTAAGTGACGATCGTCGGCAGCGTC
			i5_v2_391	AATGATACGGCGACCACCGAGATCTACACAAGGCTAAGCGATCGTCGGCAGCGTC
			i5_v2_392	AATGATACGGCGACCACCGAGATCTACACCCCGTAGCATTTTCGTCGGCAGCGTC
			i5_v2_393	AATGATACGGCGACCACCGAGATCTACACGCTCACAAACACTCGTCGGCAGCGTC
			i5_v2_394	AATGATACGGCGACCACCGAGATCTACACATACGCTACCAGTCGTCGGCAGCGTC
			i5_v2_395	AATGATACGGCGACCACCGAGATCTACACTCGACCCACTTATCGTCGGCAGCGTC
			i5_v2_396	AATGATACGGCGACCACCGAGATCTACACTGGCGTGGTAAATCGTCGGCAGCGTC
			i5_v2_397	AATGATACGGCGACCACCGAGATCTACACTAGACGCAGCCTTCGTCGGCAGCGTC
			i5_v2_398	AATGATACGGCGACCACCGAGATCTACACCAGAGGACAACCTCGTCGGCAGCGTC
			i5_v2_399	AATGATACGGCGACCACCGAGATCTACACGTCGCTCAGAACTCGTCGGCAGCGTC
			i5_v2_400	AATGATACGGCGACCACCGAGATCTACACATGAGTTCGGGTTCGTCGGCAGCGTC
			i5_v2_401	AATGATACGGCGACCACCGAGATCTACACGTTTCAGCCGCTTCGTCGGCAGCGTC
			i5_v2_402	AATGATACGGCGACCACCGAGATCTACACCGTCATTGTCTCTCGTCGGCAGCGTC
			i5_v2_403	AATGATACGGCGACCACCGAGATCTACACGAGTAGGAGAACTCGTCGGCAGCGTC
			i5_v2_404	AATGATACGGCGACCACCGAGATCTACACAACGGCTTAAGCTCGTCGGCAGCGTC
			i5_v2_405	AATGATACGGCGACCACCGAGATCTACACTCCAGGCCTTGATCGTCGGCAGCGTC
			i5_v2_406	AATGATACGGCGACCACCGAGATCTACACGTTTCTCGTCAGTCGTCGGCAGCGTC
			i5_v2_407	AATGATACGGCGACCACCGAGATCTACACGGGTGAACTGGTTCGTCGGCAGCGTC
			i5_v2_408	AATGATACGGCGACCACCGAGATCTACACAAGACGTCTAAGTCGTCGGCAGCGTC
			i5_v2_409	AATGATACGGCGACCACCGAGATCTACACCTCATATGCCGGTCGTCGGCAGCGTC
			i5_v2_410	AATGATACGGCGACCACCGAGATCTACACCTCCTTAGATGTTCGTCGGCAGCGTC
			i5_v2_411	AATGATACGGCGACCACCGAGATCTACACTGTGCAAACTCCTCGTCGGCAGCGTC
			i5_v2_412	AATGATACGGCGACCACCGAGATCTACACTCGATCGCTCACTCGTCGGCAGCGTC
			i5_v2_413	AATGATACGGCGACCACCGAGATCTACACGCCCGTCATTTGTCGTCGGCAGCGTC
			i5_v2_414	AATGATACGGCGACCACCGAGATCTACACCTGGGATCAAGCTCGTCGGCAGCGTC
			i5_v2_415	AATGATACGGCGACCACCGAGATCTACACCGCACAGTGTCATCGTCGGCAGCGTC
			i5_v2_416	AATGATACGGCGACCACCGAGATCTACACCCCTTATCTGAGTCGTCGGCAGCGTC
			i5_v2_417	AATGATACGGCGACCACCGAGATCTACACGGAGTTCATACGTCGTCGGCAGCGTC
			i5_v2_418	AATGATACGGCGACCACCGAGATCTACACGGTTCCGATTGCTCGTCGGCAGCGTC
			i5_v2_419	AATGATACGGCGACCACCGAGATCTACACAAAGACGCAGTTTCGTCGGCAGCGTC
			i5_v2_420	AATGATACGGCGACCACCGAGATCTACACATTGGTGGTCATTCGTCGGCAGCGTC
			i5_v2_421	AATGATACGGCGACCACCGAGATCTACACTGCGCCATCTAGTCGTCGGCAGCGTC
			i5_v2_422	AATGATACGGCGACCACCGAGATCTACACTATTCGGAGCCCTCGTCGGCAGCGTC
			i5_v2_423	AATGATACGGCGACCACCGAGATCTACACACTCCATAGGCATCGTCGGCAGCGTC
			i5_v2_424	AATGATACGGCGACCACCGAGATCTACACACGCCACTATGTTCGTCGGCAGCGTC
			i5_v2_425	AATGATACGGCGACCACCGAGATCTACACAGGTAGATACCCTCGTCGGCAGCGTC
			i5_v2_426	AATGATACGGCGACCACCGAGATCTACACCCTGCAATTGAATCGTCGGCAGCGTC
			i5_v2_427	AATGATACGGCGACCACCGAGATCTACACTAGCCAGAGCATTCGTCGGCAGCGTC
			i5_v2_428	AATGATACGGCGACCACCGAGATCTACACGAGCTCTCTACCTCGTCGGCAGCGTC
			i5_v2_429	AATGATACGGCGACCACCGAGATCTACACCTGTATCGTTCGTCGTCGGCAGCGTC
			i5_v2_430	AATGATACGGCGACCACCGAGATCTACACGTTCTGACGAGGTCGTCGGCAGCGTC
			i5_v2_431	AATGATACGGCGACCACCGAGATCTACACGAATCGTAATGGTCGTCGGCAGCGTC
			i5_v2_432	AATGATACGGCGACCACCGAGATCTACACTCTCCTATTGTCTCGTCGGCAGCGTC
			i5_v2_433	AATGATACGGCGACCACCGAGATCTACACCATAAGCTTCACTCGTCGGCAGCGTC
			i5_v2_434	AATGATACGGCGACCACCGAGATCTACACTTACTTAGCGACTCGTCGGCAGCGTC
			i5_v2_435	AATGATACGGCGACCACCGAGATCTACACGGAATGTACCGGTCGTCGGCAGCGTC
			i5_v2_436	AATGATACGGCGACCACCGAGATCTACACATTCAGTACACGTCGTCGGCAGCGTC
			i5_v2_437	AATGATACGGCGACCACCGAGATCTACACAGTACAAACCCATCGTCGGCAGCGTC
			i5_v2_438	AATGATACGGCGACCACCGAGATCTACACTCGCATGCTTTCTCGTCGGCAGCGTC
			i5_v2_439	AATGATACGGCGACCACCGAGATCTACACAAGGGAACCATTTCGTCGGCAGCGTC
			i5_v2_440	AATGATACGGCGACCACCGAGATCTACACCTGATACGCAAGTCGTCGGCAGCGTC
			i5_v2_441	AATGATACGGCGACCACCGAGATCTACACAGTAATTCGGCGTCGTCGGCAGCGTC
			i5_v2_442	AATGATACGGCGACCACCGAGATCTACACTCAGCAGAGCCTTCGTCGGCAGCGTC
			i5_v2_443	AATGATACGGCGACCACCGAGATCTACACTCTCAAGTCGCGTCGTCGGCAGCGTC
			i5_v2_444	AATGATACGGCGACCACCGAGATCTACACGACCCTTTGATATCGTCGGCAGCGTC
			i5_v2_445	AATGATACGGCGACCACCGAGATCTACACTTCTCGATTGTCTCGTCGGCAGCGTC
			i5_v2_446	AATGATACGGCGACCACCGAGATCTACACAGGAACTCAGCATCGTCGGCAGCGTC
			i5_v2_447	AATGATACGGCGACCACCGAGATCTACACCAAGAGATAGCGTCGTCGGCAGCGTC
			i5_v2_448	AATGATACGGCGACCACCGAGATCTACACCATAATGCTCGATCGTCGGCAGCGTC
			i5_v2_449	AATGATACGGCGACCACCGAGATCTACACATTTGTATCGCGTCGTCGGCAGCGTC
			i5_v2_450	AATGATACGGCGACCACCGAGATCTACACTTCAGGCGACATTCGTCGGCAGCGTC
			i5_v2_451	AATGATACGGCGACCACCGAGATCTACACCCGGTTTGGTGATCGTCGGCAGCGTC
			i5_v2_452	AATGATACGGCGACCACCGAGATCTACACGAACGTGTCCATTCGTCGGCAGCGTC
			i5_v2_453	AATGATACGGCGACCACCGAGATCTACACGGAAATCTGGACTCGTCGGCAGCGTC
			i5_v2_454	AATGATACGGCGACCACCGAGATCTACACATCCCTTTATCCTCGTCGGCAGCGTC
			i5_v2_455	AATGATACGGCGACCACCGAGATCTACACGGATAAGCTTCCTCGTCGGCAGCGTC
			i5_v2_456	AATGATACGGCGACCACCGAGATCTACACTCTCTGTCGACCTCGTCGGCAGCGTC
			i5_v2_457	AATGATACGGCGACCACCGAGATCTACACTACGTGGATCTATCGTCGGCAGCGTC
			i5_v2_458	AATGATACGGCGACCACCGAGATCTACACTGGTAGAAGCCATCGTCGGCAGCGTC
			i5_v2_459	AATGATACGGCGACCACCGAGATCTACACCTTTAGGTGGTTTCGTCGGCAGCGTC
			i5_v2_460	AATGATACGGCGACCACCGAGATCTACACCCTACGCATGATTCGTCGGCAGCGTC
			i5_v2_461	AATGATACGGCGACCACCGAGATCTACACTCTAGTAAGGTGTCGTCGGCAGCGTC
			i5_v2_462	AATGATACGGCGACCACCGAGATCTACACCCGTTGGAAAGCTCGTCGGCAGCGTC
			i5_v2_463	AATGATACGGCGACCACCGAGATCTACACGAGAGACATAGCTCGTCGGCAGCGTC
			i5_v2_464	AATGATACGGCGACCACCGAGATCTACACTGGTGAATGTAGTCGTCGGCAGCGTC
			i5_v2_465	AATGATACGGCGACCACCGAGATCTACACTCACAGAACATGTCGTCGGCAGCGTC
			i5_v2_466	AATGATACGGCGACCACCGAGATCTACACACAGAATCACTGTCGTCGGCAGCGTC
			i5_v2_467	AATGATACGGCGACCACCGAGATCTACACCTCGTTGGGTTATCGTCGGCAGCGTC
			i5_v2_468	AATGATACGGCGACCACCGAGATCTACACGTTCTAGGGACGTCGTCGGCAGCGTC
			i5_v2_469	AATGATACGGCGACCACCGAGATCTACACAGCGAAGTGGCATCGTCGGCAGCGTC
			i5_v2_470	AATGATACGGCGACCACCGAGATCTACACGTCTTACAGGTGTCGTCGGCAGCGTC
			i5_v2_471	AATGATACGGCGACCACCGAGATCTACACGTGGAAGCGGTATCGTCGGCAGCGTC
			i5_v2_472	AATGATACGGCGACCACCGAGATCTACACCTACAAGCCATTTCGTCGGCAGCGTC
			i5_v2_473	AATGATACGGCGACCACCGAGATCTACACAGAACTCTCCCATCGTCGGCAGCGTC
			i5_v2_474	AATGATACGGCGACCACCGAGATCTACACAATGAGTGCTTCTCGTCGGCAGCGTC
			i5_v2_475	AATGATACGGCGACCACCGAGATCTACACGTAATTCCACGATCGTCGGCAGCGTC
			i5_v2_476	AATGATACGGCGACCACCGAGATCTACACCTCTAGTTCCGCTCGTCGGCAGCGTC
			i5_v2_477	AATGATACGGCGACCACCGAGATCTACACTTATCTACCAGCTCGTCGGCAGCGTC
			i5_v2_478	AATGATACGGCGACCACCGAGATCTACACATAGGGCTAAAGTCGTCGGCAGCGTC
			i5_v2_479	AATGATACGGCGACCACCGAGATCTACACCCCTCAGTCTTATCGTCGGCAGCGTC
			i5_v2_480	AATGATACGGCGACCACCGAGATCTACACCAGTGCCATTCTTCGTCGGCAGCGTC
			i5_v2_481	AATGATACGGCGACCACCGAGATCTACACATCCTAGCTAGCTCGTCGGCAGCGTC
			i5_v2_482	AATGATACGGCGACCACCGAGATCTACACTGAGTCGAGCCATCGTCGGCAGCGTC
			i5_v2_483	AATGATACGGCGACCACCGAGATCTACACTCAAGTCAGAGATCGTCGGCAGCGTC
			i5_v2_484	AATGATACGGCGACCACCGAGATCTACACACGACAGTTCCTTCGTCGGCAGCGTC
			i5_v2_485	AATGATACGGCGACCACCGAGATCTACACGCATGCTCACACTCGTCGGCAGCGTC
			i5_v2_486	AATGATACGGCGACCACCGAGATCTACACCCCAGCATCTTATCGTCGGCAGCGTC
			i5_v2_487	AATGATACGGCGACCACCGAGATCTACACGGTAACAAGGCATCGTCGGCAGCGTC
			i5_v2_488	AATGATACGGCGACCACCGAGATCTACACGCGTCTAGCTCATCGTCGGCAGCGTC
			i5_v2_489	AATGATACGGCGACCACCGAGATCTACACGAACCTGTCACATCGTCGGCAGCGTC
			i5_v2_490	AATGATACGGCGACCACCGAGATCTACACAGTTAGTACCGATCGTCGGCAGCGTC
			i5_v2_491	AATGATACGGCGACCACCGAGATCTACACAGAGTAACCCTGTCGTCGGCAGCGTC
			i5_v2_492	AATGATACGGCGACCACCGAGATCTACACGCATCATCCAAGTCGTCGGCAGCGTC
			i5_v2_493	AATGATACGGCGACCACCGAGATCTACACCCAAATGGAATCTCGTCGGCAGCGTC
			i5_v2_494	AATGATACGGCGACCACCGAGATCTACACAATAGGTTCGACTCGTCGGCAGCGTC
			i5_v2_495	AATGATACGGCGACCACCGAGATCTACACCGGGTAATCTTGTCGTCGGCAGCGTC
			i5_v2_496	AATGATACGGCGACCACCGAGATCTACACTGTGTGGCAAACTCGTCGGCAGCGTC
			i5_v2_497	AATGATACGGCGACCACCGAGATCTACACACCAACGGCTTCTCGTCGGCAGCGTC
			i5_v2_498	AATGATACGGCGACCACCGAGATCTACACCAGACATCGTCCTCGTCGGCAGCGTC
			i5_v2_499	AATGATACGGCGACCACCGAGATCTACACGGTTGGTGTCTTTCGTCGGCAGCGTC
			i5_v2_500	AATGATACGGCGACCACCGAGATCTACACGCGTTCTGTAACTCGTCGGCAGCGTC
			i5_v2_501	AATGATACGGCGACCACCGAGATCTACACGTCGCAATTAGATCGTCGGCAGCGTC
			i5_v2_502	AATGATACGGCGACCACCGAGATCTACACTCAGGCATTCTGTCGTCGGCAGCGTC
			i5_v2_503	AATGATACGGCGACCACCGAGATCTACACGACTTTCCGCGATCGTCGGCAGCGTC
			i5_v2_504	AATGATACGGCGACCACCGAGATCTACACCAAGACTCCTTATCGTCGGCAGCGTC
			i5_v2_505	AATGATACGGCGACCACCGAGATCTACACTCTTGCAAGTCGTCGTCGGCAGCGTC
			i5_v2_506	AATGATACGGCGACCACCGAGATCTACACCCTTCAAACTCTTCGTCGGCAGCGTC
			i5_v2_507	AATGATACGGCGACCACCGAGATCTACACTAGGCTTGTGAGTCGTCGGCAGCGTC
			i5_v2_508	AATGATACGGCGACCACCGAGATCTACACTTGGTTATCAGGTCGTCGGCAGCGTC
			i5_v2_509	AATGATACGGCGACCACCGAGATCTACACGGTCAACGGATGTCGTCGGCAGCGTC
			i5_v2_510	AATGATACGGCGACCACCGAGATCTACACATGAGGGACGTCTCGTCGGCAGCGTC
			i5_v2_511	AATGATACGGCGACCACCGAGATCTACACGGGTACGCGTTATCGTCGGCAGCGTC
			i5_v2_512	AATGATACGGCGACCACCGAGATCTACACGATATTAACGCGTCGTCGGCAGCGTC
			i5_v2_513	AATGATACGGCGACCACCGAGATCTACACCCACTTAGGTTTTCGTCGGCAGCGTC
			i5_v2_514	AATGATACGGCGACCACCGAGATCTACACTGGCACCATATCTCGTCGGCAGCGTC
			i5_v2_515	AATGATACGGCGACCACCGAGATCTACACGTCACTAACTTGTCGTCGGCAGCGTC
			i5_v2_516	AATGATACGGCGACCACCGAGATCTACACATAGCTCTCGCGTCGTCGGCAGCGTC
			i5_v2_517	AATGATACGGCGACCACCGAGATCTACACCTACGGCGTATCTCGTCGGCAGCGTC
			i5_v2_518	AATGATACGGCGACCACCGAGATCTACACTGGTGAAACATCTCGTCGGCAGCGTC
			i5_v2_519	AATGATACGGCGACCACCGAGATCTACACGCTAAATCAGGATCGTCGGCAGCGTC
			i5_v2_520	AATGATACGGCGACCACCGAGATCTACACACTGACTCGGGTTCGTCGGCAGCGTC
			i5_v2_521	AATGATACGGCGACCACCGAGATCTACACTAGTGCAACCTATCGTCGGCAGCGTC
			i5_v2_522	AATGATACGGCGACCACCGAGATCTACACTTATACAGGCGCTCGTCGGCAGCGTC
			i5_v2_523	AATGATACGGCGACCACCGAGATCTACACTCACAACCGACTTCGTCGGCAGCGTC
			i5_v2_524	AATGATACGGCGACCACCGAGATCTACACACGATTGTAAGCTCGTCGGCAGCGTC
			i5_v2_525	AATGATACGGCGACCACCGAGATCTACACCCACGTATTGGGTCGTCGGCAGCGTC
			i5_v2_526	AATGATACGGCGACCACCGAGATCTACACCCAGCAAGTATCTCGTCGGCAGCGTC
			i5_v2_527	AATGATACGGCGACCACCGAGATCTACACCGAATACCGGGTTCGTCGGCAGCGTC
			i5_v2_528	AATGATACGGCGACCACCGAGATCTACACCTTGAGCCCAACTCGTCGGCAGCGTC
			i5_v2_529	AATGATACGGCGACCACCGAGATCTACACCCGAAATAACTCTCGTCGGCAGCGTC
			i5_v2_530	AATGATACGGCGACCACCGAGATCTACACCTGCGCCAGAAATCGTCGGCAGCGTC
			i5_v2_531	AATGATACGGCGACCACCGAGATCTACACTGAGGTGATGTATCGTCGGCAGCGTC
			i5_v2_532	AATGATACGGCGACCACCGAGATCTACACGTTCACGCGTGTTCGTCGGCAGCGTC
			i5_v2_533	AATGATACGGCGACCACCGAGATCTACACTAAACGCTGAGCTCGTCGGCAGCGTC
			i5_v2_534	AATGATACGGCGACCACCGAGATCTACACATACCACCCTTCTCGTCGGCAGCGTC
			i5_v2_535	AATGATACGGCGACCACCGAGATCTACACAGTATAGTTCCGTCGTCGGCAGCGTC
			i5_v2_536	AATGATACGGCGACCACCGAGATCTACACCCGAGTATTACCTCGTCGGCAGCGTC
			i5_v2_537	AATGATACGGCGACCACCGAGATCTACACTCCCTCGATCTGTCGTCGGCAGCGTC
			i5_v2_538	AATGATACGGCGACCACCGAGATCTACACGCTGTTGCCAAGTCGTCGGCAGCGTC
			i5_v2_539	AATGATACGGCGACCACCGAGATCTACACTTACTCATCCCTTCGTCGGCAGCGTC
			i5_v2_540	AATGATACGGCGACCACCGAGATCTACACCCGCATGACCATTCGTCGGCAGCGTC
			i5_v2_541	AATGATACGGCGACCACCGAGATCTACACTCGATGGCGCTTTCGTCGGCAGCGTC
			i5_v2_542	AATGATACGGCGACCACCGAGATCTACACCTCTTGACTAGCTCGTCGGCAGCGTC
			i5_v2_543	AATGATACGGCGACCACCGAGATCTACACACGATAGGATGGTCGTCGGCAGCGTC
			i5_v2_544	AATGATACGGCGACCACCGAGATCTACACGGAGATGTGCTCTCGTCGGCAGCGTC
			i5_v2_545	AATGATACGGCGACCACCGAGATCTACACAGCTACGTTGTATCGTCGGCAGCGTC
			i5_v2_546	AATGATACGGCGACCACCGAGATCTACACGCACATCTTCAGTCGTCGGCAGCGTC
			i5_v2_547	AATGATACGGCGACCACCGAGATCTACACACTGGTGGACTATCGTCGGCAGCGTC
			i5_v2_548	AATGATACGGCGACCACCGAGATCTACACCGTGTTGAATCCTCGTCGGCAGCGTC
			i5_v2_549	AATGATACGGCGACCACCGAGATCTACACAGAGGCGTTAAATCGTCGGCAGCGTC
			i5_v2_550	AATGATACGGCGACCACCGAGATCTACACTTGTGGATGGCCTCGTCGGCAGCGTC
			i5_v2_551	AATGATACGGCGACCACCGAGATCTACACTCGCATTGTAAGTCGTCGGCAGCGTC
			i5_v2_552	AATGATACGGCGACCACCGAGATCTACACGGATCGATATCGTCGTCGGCAGCGTC
			i5_v2_553	AATGATACGGCGACCACCGAGATCTACACATGCTCCAAACTTCGTCGGCAGCGTC
			i5_v2_554	AATGATACGGCGACCACCGAGATCTACACATTGGGCGTGACTCGTCGGCAGCGTC
			i5_v2_555	AATGATACGGCGACCACCGAGATCTACACAGTCAGCTAAAGTCGTCGGCAGCGTC
			i5_v2_556	AATGATACGGCGACCACCGAGATCTACACTAAGTGACGTGGTCGTCGGCAGCGTC
			i5_v2_557	AATGATACGGCGACCACCGAGATCTACACTTCCGGACTAGTTCGTCGGCAGCGTC
			i5_v2_558	AATGATACGGCGACCACCGAGATCTACACGTCATATCGGAGTCGTCGGCAGCGTC
			i5_v2_559	AATGATACGGCGACCACCGAGATCTACACTCTTCGTCTATCTCGTCGGCAGCGTC
			i5_v2_560	AATGATACGGCGACCACCGAGATCTACACACAAGAACCCGTTCGTCGGCAGCGTC
			i5_v2_561	AATGATACGGCGACCACCGAGATCTACACTACTATGGTGACTCGTCGGCAGCGTC
			i5_v2_562	AATGATACGGCGACCACCGAGATCTACACCTTGTCAAGAACTCGTCGGCAGCGTC
			i5_v2_563	AATGATACGGCGACCACCGAGATCTACACCTTGTGAGAAGCTCGTCGGCAGCGTC
			i5_v2_564	AATGATACGGCGACCACCGAGATCTACACTCTTCTTCGTCGTCGTCGGCAGCGTC
			i5_v2_565	AATGATACGGCGACCACCGAGATCTACACAGATGAAGTGCCTCGTCGGCAGCGTC
			i5_v2_566	AATGATACGGCGACCACCGAGATCTACACGTGACTCGCTATTCGTCGGCAGCGTC
			i5_v2_567	AATGATACGGCGACCACCGAGATCTACACAACTATACCCTCTCGTCGGCAGCGTC
			i5_v2_568	AATGATACGGCGACCACCGAGATCTACACGCAACCACGGATTCGTCGGCAGCGTC
			i5_v2_569	AATGATACGGCGACCACCGAGATCTACACGTAGGGAACACCTCGTCGGCAGCGTC
			i5_v2_570	AATGATACGGCGACCACCGAGATCTACACCACTCGTGGTTGTCGTCGGCAGCGTC
			i5_v2_571	AATGATACGGCGACCACCGAGATCTACACGAGAATTCGGTTTCGTCGGCAGCGTC
			i5_v2_572	AATGATACGGCGACCACCGAGATCTACACAGCCGATCCTTTTCGTCGGCAGCGTC
			i5_v2_573	AATGATACGGCGACCACCGAGATCTACACATTGTGCTGACATCGTCGGCAGCGTC
			i5_v2_574	AATGATACGGCGACCACCGAGATCTACACACAGGTGGAAGGTCGTCGGCAGCGTC
			i5_v2_575	AATGATACGGCGACCACCGAGATCTACACGGGTGTAAGTAATCGTCGGCAGCGTC
			i5_v2_576	AATGATACGGCGACCACCGAGATCTACACCTCGGAACTTCATCGTCGGCAGCGTC
			i5_v2_577	AATGATACGGCGACCACCGAGATCTACACACATAGGTCGCCTCGTCGGCAGCGTC
			i5_v2_578	AATGATACGGCGACCACCGAGATCTACACAAGTCGTCTGGATCGTCGGCAGCGTC
			i5_v2_579	AATGATACGGCGACCACCGAGATCTACACGGCTCTGGTGTATCGTCGGCAGCGTC
			i5_v2_580	AATGATACGGCGACCACCGAGATCTACACGTTTAATCCTGCTCGTCGGCAGCGTC
			i5_v2_581	AATGATACGGCGACCACCGAGATCTACACTCTACACAGACTTCGTCGGCAGCGTC
			i5_v2_582	AATGATACGGCGACCACCGAGATCTACACCGGAGTCTCAAGTCGTCGGCAGCGTC
			i5_v2_583	AATGATACGGCGACCACCGAGATCTACACACCGTCCCAAAGTCGTCGGCAGCGTC
			i5_v2_584	AATGATACGGCGACCACCGAGATCTACACACTATCTCGCGATCGTCGGCAGCGTC
			i5_v2_585	AATGATACGGCGACCACCGAGATCTACACGAAAGGAAGTACTCGTCGGCAGCGTC
			i5_v2_586	AATGATACGGCGACCACCGAGATCTACACTTCTTGGGCCTGTCGTCGGCAGCGTC
			i5_v2_587	AATGATACGGCGACCACCGAGATCTACACTATCTCGGGTTTTCGTCGGCAGCGTC
			i5_v2_588	AATGATACGGCGACCACCGAGATCTACACCGGGAGAGATGTTCGTCGGCAGCGTC
			i5_v2_589	AATGATACGGCGACCACCGAGATCTACACTGTCAGTCATTCTCGTCGGCAGCGTC
			i5_v2_590	AATGATACGGCGACCACCGAGATCTACACCTGATGCGACTCTCGTCGGCAGCGTC
			i5_v2_591	AATGATACGGCGACCACCGAGATCTACACGTCTGGACCATATCGTCGGCAGCGTC
			i5_v2_592	AATGATACGGCGACCACCGAGATCTACACGATATAGGTGTGTCGTCGGCAGCGTC
			i5_v2_593	AATGATACGGCGACCACCGAGATCTACACTCATGCATGGTTTCGTCGGCAGCGTC
			i5_v2_594	AATGATACGGCGACCACCGAGATCTACACCCCAAGAGACAATCGTCGGCAGCGTC
			i5_v2_595	AATGATACGGCGACCACCGAGATCTACACACCGTTAACTGTTCGTCGGCAGCGTC
			i5_v2_596	AATGATACGGCGACCACCGAGATCTACACGAGTGATCTTCGTCGTCGGCAGCGTC
			i5_v2_597	AATGATACGGCGACCACCGAGATCTACACCTAATCCTTAGCTCGTCGGCAGCGTC
			i5_v2_598	AATGATACGGCGACCACCGAGATCTACACCCTCCTCAATTTTCGTCGGCAGCGTC
			i5_v2_599	AATGATACGGCGACCACCGAGATCTACACGAAACGGCCATTTCGTCGGCAGCGTC
			i5_v2_600	AATGATACGGCGACCACCGAGATCTACACCACAGCACTCAATCGTCGGCAGCGTC
			i5_v2_601	AATGATACGGCGACCACCGAGATCTACACTACATACCGCGTTCGTCGGCAGCGTC
			i5_v2_602	AATGATACGGCGACCACCGAGATCTACACAGACTCCGAAGCTCGTCGGCAGCGTC
			i5_v2_603	AATGATACGGCGACCACCGAGATCTACACAGTCTGCAGAAATCGTCGGCAGCGTC
			i5_v2_604	AATGATACGGCGACCACCGAGATCTACACAGGTACATGAAGTCGTCGGCAGCGTC
			i5_v2_605	AATGATACGGCGACCACCGAGATCTACACAACCGGAAGCGATCGTCGGCAGCGTC
			i5_v2_606	AATGATACGGCGACCACCGAGATCTACACCCGTAAGTTTCGTCGTCGGCAGCGTC
			i5_v2_607	AATGATACGGCGACCACCGAGATCTACACTAGTGACGCTGTTCGTCGGCAGCGTC
			i5_v2_608	AATGATACGGCGACCACCGAGATCTACACCTAACTAGTAGGTCGTCGGCAGCGTC
			i5_v2_609	AATGATACGGCGACCACCGAGATCTACACCCTTCTTTATCCTCGTCGGCAGCGTC
			i5_v2_610	AATGATACGGCGACCACCGAGATCTACACTGGAACGTGTTCTCGTCGGCAGCGTC
			i5_v2_611	AATGATACGGCGACCACCGAGATCTACACTCATAAGCAGGCTCGTCGGCAGCGTC
			i5_v2_612	AATGATACGGCGACCACCGAGATCTACACGTGTAGTCGCCTTCGTCGGCAGCGTC
			i5_v2_613	AATGATACGGCGACCACCGAGATCTACACCTCGTCTTGCGTTCGTCGGCAGCGTC
			i5_v2_614	AATGATACGGCGACCACCGAGATCTACACCAAGCGATTGGTTCGTCGGCAGCGTC
			i5_v2_615	AATGATACGGCGACCACCGAGATCTACACAAGTACCCTGACTCGTCGGCAGCGTC
			i5_v2_616	AATGATACGGCGACCACCGAGATCTACACGTGTTCCTGACATCGTCGGCAGCGTC
			i5_v2_617	AATGATACGGCGACCACCGAGATCTACACACGGACACGAACTCGTCGGCAGCGTC
			i5_v2_618	AATGATACGGCGACCACCGAGATCTACACACGGCACACTCTTCGTCGGCAGCGTC
			i5_v2_619	AATGATACGGCGACCACCGAGATCTACACAGACCTCTGGAATCGTCGGCAGCGTC
			i5_v2_620	AATGATACGGCGACCACCGAGATCTACACTAGCCATCGGGTTCGTCGGCAGCGTC
			i5_v2_621	AATGATACGGCGACCACCGAGATCTACACTACGACTAAACCTCGTCGGCAGCGTC
			i5_v2_622	AATGATACGGCGACCACCGAGATCTACACCCCACAAATTAGTCGTCGGCAGCGTC
			i5_v2_623	AATGATACGGCGACCACCGAGATCTACACTAATGGATCCCTTCGTCGGCAGCGTC
			i5_v2_624	AATGATACGGCGACCACCGAGATCTACACGCGTACATGCAATCGTCGGCAGCGTC
			i5_v2_625	AATGATACGGCGACCACCGAGATCTACACGTTTCGCTGTGGTCGTCGGCAGCGTC
			i5_v2_626	AATGATACGGCGACCACCGAGATCTACACGAGTACTGTTAGTCGTCGGCAGCGTC
			i5_v2_627	AATGATACGGCGACCACCGAGATCTACACCTTTCATGACACTCGTCGGCAGCGTC
			i5_v2_628	AATGATACGGCGACCACCGAGATCTACACTCCACGACACTTTCGTCGGCAGCGTC
			i5_v2_629	AATGATACGGCGACCACCGAGATCTACACATAAGACTGTCGTCGTCGGCAGCGTC
			i5_v2_630	AATGATACGGCGACCACCGAGATCTACACATCCGGTGCATATCGTCGGCAGCGTC
			i5_v2_631	AATGATACGGCGACCACCGAGATCTACACTGGCAAGCATAGTCGTCGGCAGCGTC
			i5_v2_632	AATGATACGGCGACCACCGAGATCTACACCACTGCTTAGTATCGTCGGCAGCGTC
			i5_v2_633	AATGATACGGCGACCACCGAGATCTACACTTGTTAGGCACTTCGTCGGCAGCGTC
			i5_v2_634	AATGATACGGCGACCACCGAGATCTACACCACGAATGGATCTCGTCGGCAGCGTC
			i5_v2_635	AATGATACGGCGACCACCGAGATCTACACTGGAATAGGTACTCGTCGGCAGCGTC
			i5_v2_636	AATGATACGGCGACCACCGAGATCTACACTCGTGTAGACAGTCGTCGGCAGCGTC
			i5_v2_637	AATGATACGGCGACCACCGAGATCTACACGGCGAAACCTATTCGTCGGCAGCGTC
			i5_v2_638	AATGATACGGCGACCACCGAGATCTACACTAGTCGTGACCTTCGTCGGCAGCGTC
			i5_v2_639	AATGATACGGCGACCACCGAGATCTACACAAGTTGGAGGTATCGTCGGCAGCGTC
			i5_v2_640	AATGATACGGCGACCACCGAGATCTACACTTAAGGCGGTGGTCGTCGGCAGCGTC
			i5_v2_641	AATGATACGGCGACCACCGAGATCTACACATCGGAACGAGTTCGTCGGCAGCGTC
			i5_v2_642	AATGATACGGCGACCACCGAGATCTACACCTTGAAGGATTGTCGTCGGCAGCGTC
			i5_v2_643	AATGATACGGCGACCACCGAGATCTACACTACGTCAGATTGTCGTCGGCAGCGTC
			i5_v2_644	AATGATACGGCGACCACCGAGATCTACACTTAGCGGGTTATTCGTCGGCAGCGTC
			i5_v2_645	AATGATACGGCGACCACCGAGATCTACACGATCTCGGACTATCGTCGGCAGCGTC
			i5_v2_646	AATGATACGGCGACCACCGAGATCTACACATACACTGTCCCTCGTCGGCAGCGTC
			i5_v2_647	AATGATACGGCGACCACCGAGATCTACACGAAATGGTGGCGTCGTCGGCAGCGTC
			i5_v2_648	AATGATACGGCGACCACCGAGATCTACACCTGGCCTTATTTTCGTCGGCAGCGTC
			i5_v2_649	AATGATACGGCGACCACCGAGATCTACACCGGTAACACAAATCGTCGGCAGCGTC
			i5_v2_650	AATGATACGGCGACCACCGAGATCTACACGGCCTATAACTGTCGTCGGCAGCGTC
			i5_v2_651	AATGATACGGCGACCACCGAGATCTACACAATCCCAACGTCTCGTCGGCAGCGTC
			i5_v2_652	AATGATACGGCGACCACCGAGATCTACACTGTCTCACGGCATCGTCGGCAGCGTC
			i5_v2_653	AATGATACGGCGACCACCGAGATCTACACAATTGGTGGTCATCGTCGGCAGCGTC
			i5_v2_654	AATGATACGGCGACCACCGAGATCTACACCAGCGTCAAAGATCGTCGGCAGCGTC
			i5_v2_655	AATGATACGGCGACCACCGAGATCTACACCTTACTGAGAACTCGTCGGCAGCGTC
			i5_v2_656	AATGATACGGCGACCACCGAGATCTACACAAGGACCAACAGTCGTCGGCAGCGTC
			i5_v2_657	AATGATACGGCGACCACCGAGATCTACACGCGGAAATGAATTCGTCGGCAGCGTC
			i5_v2_658	AATGATACGGCGACCACCGAGATCTACACTTCCCTTGCGTGTCGTCGGCAGCGTC
			i5_v2_659	AATGATACGGCGACCACCGAGATCTACACATTGCAGAGGCCTCGTCGGCAGCGTC
			i5_v2_660	AATGATACGGCGACCACCGAGATCTACACGATGTACGGTTGTCGTCGGCAGCGTC
			i5_v2_661	AATGATACGGCGACCACCGAGATCTACACGCAGAGGAACAATCGTCGGCAGCGTC
			i5_v2_662	AATGATACGGCGACCACCGAGATCTACACGTAGCCTAGAAGTCGTCGGCAGCGTC
			i5_v2_663	AATGATACGGCGACCACCGAGATCTACACAACTGACGTTCCTCGTCGGCAGCGTC
			i5_v2_664	AATGATACGGCGACCACCGAGATCTACACCAACCCGACACTTCGTCGGCAGCGTC
			i5_v2_665	AATGATACGGCGACCACCGAGATCTACACACTGCTGTGGGTTCGTCGGCAGCGTC
			i5_v2_666	AATGATACGGCGACCACCGAGATCTACACGGCGTTAGACATTCGTCGGCAGCGTC
			i5_v2_667	AATGATACGGCGACCACCGAGATCTACACTGGCTAGAACCCTCGTCGGCAGCGTC
			i5_v2_668	AATGATACGGCGACCACCGAGATCTACACGGGTCATGGATATCGTCGGCAGCGTC
			i5_v2_669	AATGATACGGCGACCACCGAGATCTACACAGTCCGGAAATCTCGTCGGCAGCGTC
			i5_v2_670	AATGATACGGCGACCACCGAGATCTACACCAAACTAGCCTATCGTCGGCAGCGTC
			i5_v2_671	AATGATACGGCGACCACCGAGATCTACACAACATACCTGCTTCGTCGGCAGCGTC
			i5_v2_672	AATGATACGGCGACCACCGAGATCTACACTCCGATTTCATCTCGTCGGCAGCGTC
			i5_v2_673	AATGATACGGCGACCACCGAGATCTACACTACAGACACTTGTCGTCGGCAGCGTC
			i5_v2_674	AATGATACGGCGACCACCGAGATCTACACCCCATGGATCGATCGTCGGCAGCGTC
			i5_v2_675	AATGATACGGCGACCACCGAGATCTACACTGGTCGCATCAATCGTCGGCAGCGTC
			i5_v2_676	AATGATACGGCGACCACCGAGATCTACACTCACAGCTCGTTTCGTCGGCAGCGTC
			i5_v2_677	AATGATACGGCGACCACCGAGATCTACACAGCATATCAGCCTCGTCGGCAGCGTC
			i5_v2_678	AATGATACGGCGACCACCGAGATCTACACTCTCCGACTCCTTCGTCGGCAGCGTC
			i5_v2_679	AATGATACGGCGACCACCGAGATCTACACCGAAGCGTGATTTCGTCGGCAGCGTC
			i5_v2_680	AATGATACGGCGACCACCGAGATCTACACAGCGCTTAGTATTCGTCGGCAGCGTC
			i5_v2_681	AATGATACGGCGACCACCGAGATCTACACTGCAGACTGGATTCGTCGGCAGCGTC
			i5_v2_682	AATGATACGGCGACCACCGAGATCTACACTGTTGAAAGCACTCGTCGGCAGCGTC
			i5_v2_683	AATGATACGGCGACCACCGAGATCTACACCGATAGATCGTATCGTCGGCAGCGTC
			i5_v2_684	AATGATACGGCGACCACCGAGATCTACACTGGCTTCCTTCGTCGTCGGCAGCGTC
			i5_v2_685	AATGATACGGCGACCACCGAGATCTACACCACATCAGCTGCTCGTCGGCAGCGTC
			i5_v2_686	AATGATACGGCGACCACCGAGATCTACACAACATTTCCCAGTCGTCGGCAGCGTC
			i5_v2_687	AATGATACGGCGACCACCGAGATCTACACATGCAGTGATCATCGTCGGCAGCGTC
			i5_v2_688	AATGATACGGCGACCACCGAGATCTACACTGACCATGAGAATCGTCGGCAGCGTC
			i5_v2_689	AATGATACGGCGACCACCGAGATCTACACAACGGCGCTGTATCGTCGGCAGCGTC
			i5_v2_690	AATGATACGGCGACCACCGAGATCTACACCGGACATAGGACTCGTCGGCAGCGTC
			i5_v2_691	AATGATACGGCGACCACCGAGATCTACACTCAGGACCTTATTCGTCGGCAGCGTC
			i5_v2_692	AATGATACGGCGACCACCGAGATCTACACGGTACGCATAGATCGTCGGCAGCGTC
			i5_v2_693	AATGATACGGCGACCACCGAGATCTACACCGGCAGTAAGTCTCGTCGGCAGCGTC
			i5_v2_694	AATGATACGGCGACCACCGAGATCTACACGTGGGAACCGAATCGTCGGCAGCGTC
			i5_v2_695	AATGATACGGCGACCACCGAGATCTACACACTCACGCTAAGTCGTCGGCAGCGTC
			i5_v2_696	AATGATACGGCGACCACCGAGATCTACACGATTAACCCAGGTCGTCGGCAGCGTC
			i5_v2_697	AATGATACGGCGACCACCGAGATCTACACGCTTTACTTGCGTCGTCGGCAGCGTC
			i5_v2_698	AATGATACGGCGACCACCGAGATCTACACGGGTAAATGGTGTCGTCGGCAGCGTC
			i5_v2_699	AATGATACGGCGACCACCGAGATCTACACGTCAGATCGCGATCGTCGGCAGCGTC
			i5_v2_700	AATGATACGGCGACCACCGAGATCTACACCTAGAGTTGTACTCGTCGGCAGCGTC
			i5_v2_701	AATGATACGGCGACCACCGAGATCTACACCAGACTGTTCCATCGTCGGCAGCGTC
			i5_v2_702	AATGATACGGCGACCACCGAGATCTACACTCAGCGTACAGATCGTCGGCAGCGTC
			i5_v2_703	AATGATACGGCGACCACCGAGATCTACACGAAGAAGGCAATTCGTCGGCAGCGTC
			i5_v2_704	AATGATACGGCGACCACCGAGATCTACACAGGAAAGCCGTATCGTCGGCAGCGTC
			i5_v2_705	AATGATACGGCGACCACCGAGATCTACACGGACTCAAATCTTCGTCGGCAGCGTC
			i5_v2_706	AATGATACGGCGACCACCGAGATCTACACCTGGAGCGTTTATCGTCGGCAGCGTC
			i5_v2_707	AATGATACGGCGACCACCGAGATCTACACGGCAATGGGCTTTCGTCGGCAGCGTC
			i5_v2_708	AATGATACGGCGACCACCGAGATCTACACGATACCGTTAGTTCGTCGGCAGCGTC
			i5_v2_709	AATGATACGGCGACCACCGAGATCTACACTAGTACTGGCCATCGTCGGCAGCGTC
			i5_v2_710	AATGATACGGCGACCACCGAGATCTACACTCGACGGGTAAATCGTCGGCAGCGTC
			i5_v2_711	AATGATACGGCGACCACCGAGATCTACACTGAACATTCCCTTCGTCGGCAGCGTC
			i5_v2_712	AATGATACGGCGACCACCGAGATCTACACCTTCGTGAATGATCGTCGGCAGCGTC
			i5_v2_713	AATGATACGGCGACCACCGAGATCTACACTATAAACTGCGCTCGTCGGCAGCGTC
			i5_v2_714	AATGATACGGCGACCACCGAGATCTACACCGTGCGAAACGATCGTCGGCAGCGTC
			i5_v2_715	AATGATACGGCGACCACCGAGATCTACACTCCTCACGACTGTCGTCGGCAGCGTC
			i5_v2_716	AATGATACGGCGACCACCGAGATCTACACGCTTAAAGGCACTCGTCGGCAGCGTC
			i5_v2_717	AATGATACGGCGACCACCGAGATCTACACGGCCCTGATAACTCGTCGGCAGCGTC
			i5_v2_718	AATGATACGGCGACCACCGAGATCTACACCCTAGGAACCGTTCGTCGGCAGCGTC
			i5_v2_719	AATGATACGGCGACCACCGAGATCTACACCCCACGAGTAATTCGTCGGCAGCGTC
			i5_v2_720	AATGATACGGCGACCACCGAGATCTACACTGTCAAGCGCGATCGTCGGCAGCGTC
			i5_v2_721	AATGATACGGCGACCACCGAGATCTACACGTGAGCTTCGCATCGTCGGCAGCGTC
			i5_v2_722	AATGATACGGCGACCACCGAGATCTACACTGCGTTGAGCTTTCGTCGGCAGCGTC
			i5_v2_723	AATGATACGGCGACCACCGAGATCTACACGAGCGTCAACTGTCGTCGGCAGCGTC
			i5_v2_724	AATGATACGGCGACCACCGAGATCTACACCATCTGGATTAGTCGTCGGCAGCGTC
			i5_v2_725	AATGATACGGCGACCACCGAGATCTACACTGACTTGTTCCCTCGTCGGCAGCGTC
			i5_v2_726	AATGATACGGCGACCACCGAGATCTACACAGGTTCTCCGTCTCGTCGGCAGCGTC
			i5_v2_727	AATGATACGGCGACCACCGAGATCTACACGTGAATAGTGGTTCGTCGGCAGCGTC
			i5_v2_728	AATGATACGGCGACCACCGAGATCTACACTTCCGTCATGGGTCGTCGGCAGCGTC
			i5_v2_729	AATGATACGGCGACCACCGAGATCTACACGAGGCTGAGGAATCGTCGGCAGCGTC
			i5_v2_730	AATGATACGGCGACCACCGAGATCTACACTGCTGGAACGTGTCGTCGGCAGCGTC
			i5_v2_731	AATGATACGGCGACCACCGAGATCTACACGGTTAACGTGCATCGTCGGCAGCGTC
			i5_v2_732	AATGATACGGCGACCACCGAGATCTACACATCTCCTAGCCCTCGTCGGCAGCGTC
			i5_v2_733	AATGATACGGCGACCACCGAGATCTACACGGGAAATAGTCATCGTCGGCAGCGTC
			i5_v2_734	AATGATACGGCGACCACCGAGATCTACACAATAGCAGAGACTCGTCGGCAGCGTC
			i5_v2_735	AATGATACGGCGACCACCGAGATCTACACTTAGGCCTCGATTCGTCGGCAGCGTC
			i5_v2_736	AATGATACGGCGACCACCGAGATCTACACGTCGTGGGCTTTTCGTCGGCAGCGTC
			i5_v2_737	AATGATACGGCGACCACCGAGATCTACACGTTAGCCTTACGTCGTCGGCAGCGTC
			i5_v2_738	AATGATACGGCGACCACCGAGATCTACACGGAGCACTTATATCGTCGGCAGCGTC
			i5_v2_739	AATGATACGGCGACCACCGAGATCTACACCTACTCGATGTCTCGTCGGCAGCGTC
			i5_v2_740	AATGATACGGCGACCACCGAGATCTACACCGAGGAAGTACGTCGTCGGCAGCGTC
			i5_v2_741	AATGATACGGCGACCACCGAGATCTACACTGGCATCCCTTTTCGTCGGCAGCGTC
			i5_v2_742	AATGATACGGCGACCACCGAGATCTACACAGGACTTGTCAATCGTCGGCAGCGTC
			i5_v2_743	AATGATACGGCGACCACCGAGATCTACACAAGTGGCGAGATTCGTCGGCAGCGTC
			i5_v2_744	AATGATACGGCGACCACCGAGATCTACACGGAAGGATTCTGTCGTCGGCAGCGTC
			i5_v2_745	AATGATACGGCGACCACCGAGATCTACACGTAGGAGAAGTGTCGTCGGCAGCGTC
			i5_v2_746	AATGATACGGCGACCACCGAGATCTACACACGGCGTAGATCTCGTCGGCAGCGTC
			i5_v2_747	AATGATACGGCGACCACCGAGATCTACACTCATCATCAGCGTCGTCGGCAGCGTC
			i5_v2_748	AATGATACGGCGACCACCGAGATCTACACCGATTGGGACCTTCGTCGGCAGCGTC
			i5_v2_749	AATGATACGGCGACCACCGAGATCTACACGTACTCGACGCATCGTCGGCAGCGTC
			i5_v2_750	AATGATACGGCGACCACCGAGATCTACACACTGCGTGGAAATCGTCGGCAGCGTC
			i5_v2_751	AATGATACGGCGACCACCGAGATCTACACGGGTTATTCGCTTCGTCGGCAGCGTC
			i5_v2_752	AATGATACGGCGACCACCGAGATCTACACTGAGACCGTTCCTCGTCGGCAGCGTC
			i5_v2_753	AATGATACGGCGACCACCGAGATCTACACTCCCTTCGTGGTTCGTCGGCAGCGTC
			i5_v2_754	AATGATACGGCGACCACCGAGATCTACACGTCCAGACGATTTCGTCGGCAGCGTC
			i5_v2_755	AATGATACGGCGACCACCGAGATCTACACGCTGAGTATGCTTCGTCGGCAGCGTC
			i5_v2_756	AATGATACGGCGACCACCGAGATCTACACTTGGCAGATCTATCGTCGGCAGCGTC
			i5_v2_757	AATGATACGGCGACCACCGAGATCTACACGTACCAACGCTGTCGTCGGCAGCGTC
			i5_v2_758	AATGATACGGCGACCACCGAGATCTACACTCCAACCAACTATCGTCGGCAGCGTC
			i5_v2_759	AATGATACGGCGACCACCGAGATCTACACTATGACGTTCTCTCGTCGGCAGCGTC
			i5_v2_760	AATGATACGGCGACCACCGAGATCTACACACTAGGTCCTTCTCGTCGGCAGCGTC
			i5_v2_761	AATGATACGGCGACCACCGAGATCTACACATACTGCACGTATCGTCGGCAGCGTC
			i5_v2_762	AATGATACGGCGACCACCGAGATCTACACCACGCATGACAATCGTCGGCAGCGTC
			i5_v2_763	AATGATACGGCGACCACCGAGATCTACACGTGAAAGTCGAGTCGTCGGCAGCGTC
			i5_v2_764	AATGATACGGCGACCACCGAGATCTACACCTGAGAATTGACTCGTCGGCAGCGTC
			i5_v2_765	AATGATACGGCGACCACCGAGATCTACACTGTCGCGGATGATCGTCGGCAGCGTC
			i5_v2_766	AATGATACGGCGACCACCGAGATCTACACAGTCATTGGGACTCGTCGGCAGCGTC
			i5_v2_767	AATGATACGGCGACCACCGAGATCTACACAGCCGATCTGCATCGTCGGCAGCGTC
			i5_v2_768	AATGATACGGCGACCACCGAGATCTACACTCACGAGTATCCTCGTCGGCAGCGTC

## Sheet: Nuclei_barcodes_snATAC_v2
Barcode combination
TAGCACGAGGAGCAGTTGGTGG
TAGCACGAGGAGGTTATCGATC
TAGCACGAGGACGTCGAGTCCA
TAGCACGAGGCTACTCGATCTC
TAGCACGAGGATTTGCCCAGCT
TAGCACGAGGCTAAGAGCTCAA
TAGCACGAGGCGTCCAAAGGTC
TAGCACGAGGCTAAGGTCAGAA
TAGCACGAGGAATTAGAAGGGC
TAGCACGAGGCATCCTCCACTC
TAGCACGAGGACGCGATCAGTT
TAGCACGAGGTTAGGCAATGTC
TAGCACGAGGAAGCTCTCTGAT
TAGCACGAGGCCTCATAGTAGA
TAGCACGAGGCATCTCGACAAT
TAGCACGAGGACAACAGCGGAT
TAGCACGAGGCTGGGCTTGGTA
TAGCACGAGGCAAACACCACAT
TAGCACGAGGAACTGATAGGAG
TAGCACGAGGGGTTATGAGTCG
TAGCACGAGGATAGCTGTGTCT
TAGCACGAGGGTTGTGATGTGC
TAGCACGAGGCGTCAATAGCTG
TAGCACGAGGGTGCACCATGTG
TAGCACGAGGTACCCAATGAAC
TAGCACGAGGGGTCGTCAATCA
TAGCACGAGGAGATACCTGGAG
TAGCACGAGGTCGACCAGATCT
TAGCACGAGGGCGGATAGTAGG
TAGCACGAGGAAACGGATCAGT
TAGCACGAGGAGCCATGAGAAT
TAGCACGAGGCGAGACGTTTAA
TAGCACGAGGGCTGTAAACGGC
TAGCACGAGGTCCCTATAGCCA
TAGCACGAGGCAGCAACCGATC
TAGCACGAGGTGTTCGGATTAG
TAGCACGAGGCAAATCGAAAGC
TAGCACGAGGGACGCAACCTCT
TAGCACGAGGGCTGATCCACCT
TAGCACGAGGATAACGCAAGTC
TAGCACGAGGCCTCTGAAAGTT
TAGCACGAGGTGGTCGTGCCAT
TAGCACGAGGCGATGTCCAAGT
TAGCACGAGGGCTTCATGAACC
TAGCACGAGGTGCGTGCAGACA
TAGCACGAGGTTCTAACGCTTC
TAGCACGAGGTCTATCGACACA
TAGCACGAGGAATGGAGCAACA
TAGCACGAGGATTAGGAGGTCT
TAGCACGAGGAGCTAGGGTGCT
TAGCACGAGGCGTAGGATTCTG
TAGCACGAGGACAGATCAACGC
TAGCACGAGGTCGAGTTACTAG
TAGCACGAGGACGCCGTGACTT
TAGCACGAGGAGGTGTGACCGT
TAGCACGAGGTATGATGTTCCC
TAGCACGAGGCTTCGCGTAACG
TAGCACGAGGTTCGCTGACAGA
TAGCACGAGGCGATTTCACCGA
TAGCACGAGGTGGTATGGAGGT
TAGCACGAGGATCGAGTTAGGC
TAGCACGAGGAGATCTGTGACG
TAGCACGAGGTGCTAGCCTATA
TAGCACGAGGATGTGCCTTCTG
TAGCACGAGGACTCTTCCTCAT
TAGCACGAGGTGGGATTGACAG
TAGCACGAGGAACGTGATTTGG
TAGCACGAGGGGAGGTTACTAT
TAGCACGAGGGCATGTATCCTT
TAGCACGAGGATGTGCATCTGG
TAGCACGAGGAAAGTCGCGTGT
TAGCACGAGGGGGCTACAGTTC
TAGCACGAGGCCTACCGTTAAT
TAGCACGAGGGACGGCATAATG
TAGCACGAGGTGTCCTGCGGTA
TAGCACGAGGCGACATCTGGAT
TAGCACGAGGATGCGTATTCCC
TAGCACGAGGAAGCGGAACCTA
TAGCACGAGGCGGAACATTGTA
TAGCACGAGGGTGCTCCTAAGG
TAGCACGAGGACCGTCCCATTC
TAGCACGAGGTGCTATCGGACG
TAGCACGAGGTTAGGATGCGCG
TAGCACGAGGATCAGTCAAGGA
TAGCACGAGGCACAACCATGAT
TAGCACGAGGCATGTCCGAGTC
TAGCACGAGGTTATGGTAGACC
TAGCACGAGGTATACGAACCCG
TAGCACGAGGAACTAACGTCGA
TAGCACGAGGGGTAAATCTCCC
TAGCACGAGGGCTACAATGTGG
TAGCACGAGGTACACTCCACAA
TAGCACGAGGTAGATACATCCC
TAGCACGAGGGTTGTACGAGCC
TAGCACGAGGTTTCGCGTGTAA
TAGCACGAGGCGTTCGTTTATG
TAGCACGAGGTGGTGAGGTGAT
TAGCACGAGGATTGGACTTAGC
TAGCACGAGGTGGACATACTGG
TAGCACGAGGTTGGCTGTCTGT
TAGCACGAGGCTCCCGTGTAAG
TAGCACGAGGCAATCTGGGTGT
TAGCACGAGGGGAAGTTCAGCA
TAGCACGAGGCACCATGCCATT
TAGCACGAGGCCGTGAAAGACC
TAGCACGAGGTGCAGAACAGTG
TAGCACGAGGTGGGAATGAGGA
TAGCACGAGGTAGACTGGACCA
TAGCACGAGGGGTAGTCGAAAC
TAGCACGAGGCTGCTGGGTTCA
TAGCACGAGGGGACCGACAATG
TAGCACGAGGACGTCCGTAATT
TAGCACGAGGACTTGAGTCATC
TAGCACGAGGTCACAGTGATAG
TAGCACGAGGGGGTACAGCTTC
TAGCACGAGGTTCTGCTGGAGA
TAGCACGAGGCTCGTAGAGCGT
TAGCACGAGGTCTGACGGGACT
TAGCACGAGGCAGACCTGCTCA
TAGCACGAGGCTCACTGGATAT
TAGCACGAGGTACTAGGGTTAG
TAGCACGAGGTAGGTAAGACCA
TAGCACGAGGGTCAGTAGTCTG
TAGCACGAGGACGATCCGCACT
TAGCACGAGGTGGACGACGATC
TAGCACGAGGACTGGATATGCT
TAGCACGAGGGTGACGCGGTAT
TAGCACGAGGCGTTTATCACAC
TAGCACGAGGGGCATAATGATC
TAGCACGAGGCGATTGGCGATA
TAGCACGAGGCGTCGTGAAATT
TAGCACGAGGACCACGCAAACT
TAGCACGAGGAGATGCCGATGT
TAGCACGAGGGTGTTAGGCAAT
TAGCACGAGGTCTTCCTGCAAC
TAGCACGAGGCTTAGCAAAGAG
TAGCACGAGGTTACAGCACCGG
TAGCACGAGGAGATCGTTTGGC
TAGCACGAGGAGATTGGACAAG
TAGCACGAGGCACAAATCAACC
TAGCACGAGGAAAGGAACAGAC
TAGCACGAGGCACTGTGTTATG
TAGCACGAGGGTTGGCTATCAA
TAGCACGAGGCTCATGTAGTCT
TAGCACGAGGAGCATGCGCTTT
TAGCACGAGGGTTGGTCTACTA
TAGCACGAGGGTCGACAGATAG
TAGCACGAGGAGGAACGCCGAT
TAGCACGAGGCCGGAGAATACC
TAGCACGAGGTCAGCCCAAGTT
TAGCACGAGGATCATTGAGGCT
TAGCACGAGGAAGCTAACGCAC
TAGCACGAGGTTAAACGCGAAG
TAGCACGAGGTTAGCTTCTCTG
TAGCACGAGGTTAGGTAGCAAC
TAGCACGAGGCCTAATCCTGAG
TAGCACGAGGAGGCGGCATTAC
TAGCACGAGGGAGCATCACTAC
TAGCACGAGGGTGCAATGTCGT
TAGCACGAGGCGGTGATGACTT
TAGCACGAGGCGACGCCTTATG
TAGCACGAGGCAAACAAGAAGG
TAGCACGAGGTGTGATTCTGTG
TAGCACGAGGATAGGATGGCTC
TAGCACGAGGGTACTGGACCCT
TAGCACGAGGTGTTACTTCCCG
TAGCACGAGGGCAGAGAGAGAA
TAGCACGAGGGATGGCATCAAA
TAGCACGAGGATTTAGGGCGGG
TAGCACGAGGCTTGCGGGTGTT
TAGCACGAGGCCTTTCCGTATC
TAGCACGAGGAAAGCGGGAGCT
TAGCACGAGGTTAGTGCTAGCA
TAGCACGAGGCTAAATGTTCGG
TAGCACGAGGCCCAAGATCGAC
TAGCACGAGGGAGTGGTTGACC
TAGCACGAGGTTCCGCTGATAT
TAGCACGAGGCGGCGACTAACA
TAGCACGAGGTGGGCACATTAG
TAGCACGAGGTGTTTCCGTTGC
TAGCACGAGGCCTTTCGGCAGT
TAGCACGAGGAACCGCTAATGA
TAGCACGAGGCTTAGGTAGCGT
TAGCACGAGGGCCACCTGATAC
TAGCACGAGGACAGAAGGACCT
TAGCACGAGGCATACCCGGTTC
TAGCACGAGGAGTACGGAAAGC
TAGCACGAGGATCCAAGCCGTC
TAGCACGAGGCCATCTCTGGGA
TAGCACGAGGTTGGTGATGTCT
TAGCACGAGGCTTGCTGCCTAT
TAGCACGAGGTACCATCCCAGG
TAGCACGAGGCGCCCTGCTATA
TAGCACGAGGCCTGTAGTGGCA
TAGCACGAGGTTTGCCGGAAGG
TAGCACGAGGGCTATTGGTAGG
TAGCACGAGGGAGTGTGGCATA
TAGCACGAGGACGCTTACCCGA
TAGCACGAGGTTCAGTCGCCTA
TAGCACGAGGCAACGGCATGAG
TAGCACGAGGAGTGTCAGTCAA
TAGCACGAGGCGATTCCGGCAT
TAGCACGAGGGGATTGTTTCTG
TAGCACGAGGAATCGAACACGT
TAGCACGAGGCGAAGGTTCGAT
TAGCACGAGGAATCGCTGGATG
TAGCACGAGGAACTTGCTCACC
TAGCACGAGGTGCGCCAATCGT
TAGCACGAGGGTTGCGAATGGG
TAGCACGAGGCGAAGGGATCAT
TAGCACGAGGTTGCTGGATCGT
TAGCACGAGGGATGGCAAACAT
TAGCACGAGGAAACGTCCCGTT
TAGCACGAGGCTGCGCTTATCC
TAGCACGAGGTAGTCAGCGTGG
TAGCACGAGGCTATCCCATCCG
TAGCACGAGGACATGCCGTGCT
TAGCACGAGGTGCTAATGACGT
TAGCACGAGGAACAGGCGGGTA
TAGCACGAGGTAGAGAGGCTGC
TAGCACGAGGGCACACTCTCCT
TAGCACGAGGCAGATCCGTGAC
TAGCACGAGGTCCGTAAGGTTC
TAGCACGAGGTTAGGTAGTGGG
TAGCACGAGGAATATAGGTCCG
TAGCACGAGGAGCCTCACCATC
TAGCACGAGGGGTTGTTCCATC
TAGCACGAGGTTGAGCCCGGAT
TAGCACGAGGGAGATAGTACTG
TAGCACGAGGAAACTAGCCCTA
TAGCACGAGGTGGAGTAACCAT
TAGCACGAGGGACCAGACCTGT
TAGCACGAGGGAGGGTGATTGC
TAGCACGAGGCGCTGAGCCAAT
TAGCACGAGGTTAGAGCCCACT
TAGCACGAGGAATTCTGTTGCG
TAGCACGAGGCTCATCTACGTC
TAGCACGAGGGGGACTAATTCC
TAGCACGAGGAACTTCGACCAG
TAGCACGAGGGTATATCCGGAA
TAGCACGAGGTTCCGAGCAACT
TAGCACGAGGGCCCGTGTTGAT
TAGCACGAGGTGCCGTCTCAAC
TAGCACGAGGTATCGCCGGGTA
TAGCACGAGGGTCATAGCGTGT
TAGCACGAGGCGCGCTATACGA
TAGCACGAGGTGCAAGTGCACT
TAGCACGAGGACTGCACGCCAT
TAGCACGAGGCAGCGAAGACCT
TAGCACGAGGACGCATAGGCAC
TAGCACGAGGATTTCGATGACG
TAGCACGAGGAAGCGGGCTTGA
TAGCACGAGGTGTGACTTAGGC
TAGCACGAGGTTTCGAAGAAGG
TAGCACGAGGCATTAGTGTACC
TAGCACGAGGTAGGCAGATGGA
TAGCACGAGGCCAGCTTTCCGT
TAGCACGAGGGTAACTTGCCCT
TAGCACGAGGGGATCAACTATC
TAGCACGAGGTCCACTTGGATA
TAGCACGAGGTGCGATCGTTAG
TAGCACGAGGGTCCGGTCCAAA
TAGCACGAGGGCGTTATTGTGC
TAGCACGAGGAACGACTGCTCG
TAGCACGAGGTAGCGTCATATG
TAGCACGAGGGGACTTCTAGTT
TAGCACGAGGCCCTGGCAGTAT
TAGCACGAGGTCCACATCACTG
TAGCACGAGGTGAACCATCGTA
TAGCACGAGGGTCCACCTAGAC
TAGCACGAGGGAACCTCAGGCT
TAGCACGAGGCCCATCTGGAGA
TAGCACGAGGGATCAGTAGGAT
TAGCACGAGGGGTGTCGGTTGT
TAGCACGAGGCCTATTGAAGCC
TAGCACGAGGGATTCGCGTGCA
TAGCACGAGGAACATGAAGCGC
TAGCACGAGGGTTACCCTCGGA
TAGCACGAGGCGTGATGAGGTA
TAGCACGAGGGTTGGAGACTAA
TAGCACGAGGCGACGAGAGATC
TAGCACGAGGGGCGGGATATTC
TAGCACGAGGCCTTAAGTAGTC
TAGCACGAGGATAGCCTCCGTA
TAGCACGAGGGGCGTACTTCTA
TAGCACGAGGCCACTCTAGGTC
TAGCACGAGGGCTTTCAGCCAG
TAGCACGAGGGATGAACATGTC
TAGCACGAGGCCTAAGCTAGCT
TAGCACGAGGGGTGGCCGTATA
TAGCACGAGGGAGGAATCACGG
TAGCACGAGGGCGCACGGTAAA
TAGCACGAGGGAAGTTCTTAGG
TAGCACGAGGACCCACATGCTT
TAGCACGAGGATTTGGCCTCTA
TAGCACGAGGGACATTTGACAG
TAGCACGAGGTGACACAGCGAC
TAGCACGAGGAGGGACGGATTC
TAGCACGAGGGGTCTAATTAGG
TAGCACGAGGGCCTTAGCTAGC
TAGCACGAGGCGGATCACCTGA
TAGCACGAGGGCGATGTACGAC
TAGCACGAGGAGTCCTGGTACT
TAGCACGAGGCAAATCTCGCCG
TAGCACGAGGCTGTGAAGAGAA
TAGCACGAGGTAACAGTGCCTT
TAGCACGAGGCTTCCTGCTGTC
TAGCACGAGGTCCTTAGTCGGG
TAGCACGAGGAACCCACTATCT
TAGCACGAGGTCTAATGCCTGC
TAGCACGAGGCAGCTCAGGACA
TAGCACGAGGGCGACGTTACGA
TAGCACGAGGTTCACTACGTAG
TAGCACGAGGGTGTCGAAGCTC
TAGCACGAGGGGGCGTATTTGA
TAGCACGAGGTCCGCGGCTTAA
TAGCACGAGGAAGTAGCCCGCT
TAGCACGAGGTTGTCCTCGACG
TAGCACGAGGTGAACCTGATCG
TAGCACGAGGGAGAGGTCCACT
TAGCACGAGGAAAGCACTAGCG
TAGCACGAGGTAAGTAATCCCG
TAGCACGAGGTACAACCCGATG
TAGCACGAGGGGAGTGTTGGAA
TAGCACGAGGGCGTAACCAGTA
TAGCACGAGGGCCTAAACGAAG
TAGCACGAGGATCGTACCCGTT
TAGCACGAGGCGAGAATCGACG
TAGCACGAGGAAGTTGTGCTAC
TAGCACGAGGGTAGCCTGTTAC
TAGCACGAGGTGTTTCGGTACA
TAGCACGAGGGTGCAAACCACT
TAGCACGAGGGTACATAGATCC
TAGCACGAGGGCTCTTTCAGAA
TAGCACGAGGGGGCATAAACGT
TAGCACGAGGCGTGCAACACAA
TAGCACGAGGTAGCATCGATGC
TAGCACGAGGGCGTGCTACCAA
TAGCACGAGGCTAGACGACCTG
TAGCACGAGGGCGAACGTAGAC
TAGCACGAGGAAGGGCAAATCA
TAGCACGAGGGCTCCGGAAATT
TAGCACGAGGGTATGCCGAGAA
TAGCACGAGGCTTTAACTGCGC
TAGCACGAGGATGCGTAGCTGA
TAGCACGAGGGATAGGTGTAGC
TAGCACGAGGCCGGATCAAGTT
TAGCACGAGGTAAAGCCGGTGC
TAGCACGAGGTCAGGGAAAGCG
TAGCACGAGGCATCCTCATCAA
TAGCACGAGGGAAGTCGTAGTA
TAGCACGAGGACATGGCAAGCC
TAGCACGAGGTGAACGCAATCC
TAGCACGAGGAGGTGCAAGGTA
TAGCACGAGGGGGCAGTGGTAA
TAGCACGAGGACGTACGGTCAT
TAGCACGAGGTCCCTAACCATA
TAGCACGAGGGCTTTGCGTCGT
TAGCACGAGGACTCATCGTCTC
TAGCACGAGGACATCCGGTCTC
TAGCACGAGGTCCACACCTCCA
TAGCACGAGGACTGCGACAAAG
TAGCACGAGGGTAGGTACTAGC
TAGCACGAGGATAGGTGGTACC
TAGCACGAGGACCACGGCTGTT
TAGCACGAGGAGGCATGCAGAG
TAGCACGAGGCACCGAAGGTCA
TAGCACGAGGACCTCACTCGAA
TAGCACGAGGCTAGGCCTTTGA
TAGCACGAGGAGACTAGGAGGA
TAGCACGAGGTTAGGGACCCTC
TAGCACGAGGTGTTCTCTCTGG
TAGCACGAGGATTGGGCTAGTT
TAGCACGAGGACTCCGATGGAC
TAGCACGAGGACAGGGCCTCTT
TAGCACGAGGTCAGCATTTAGG
TAGCACGAGGGTGTAACGCGGT
TAGCACGAGGCAGAAGGTTGTT
TAGCACGAGGGAATCGGTGTTC
TAGCACGAGGGAATCAGCTTGA
TAGCACGAGGTGCGTTGATGTG
TAGCACGAGGATGGACGATCGT
TAGCACGAGGCCTTATATGTCC
TAGCACGAGGAATCCCGCGCTT
TAGCACGAGGCACCGTATGTTC
TAGCACGAGGGAGGCATTTGCA
TAGCACGAGGGTACATCTTCAC
TAGCACGAGGGGGATTAGCTGC
TAGCACGAGGGGGTTGAACCTA
TAGCACGAGGTCGTCACTTAAG
TAGCACGAGGTCGCTTAGCCTT
TAGCACGAGGAAATGCTACGGG
TAGCACGAGGGTGTTTGTGAGC
TAGCACGAGGCTGGTAGCGTAT
TAGCACGAGGTAAGTGGGTCGA
TAGCACGAGGTTTACCACGCCA
TAGCACGAGGAGGCTGCGTCTA
TAGCACGAGGGGTTGTCCTCTG
TAGCACGAGGGTTCTGAGCGAC
TAGCACGAGGACCCGAACTCAT
TAGCACGAGGAGCGGCTGAAAC
TAGCACGAGGGAGACAATGACG
TAGCACGAGGGTTCTCCTACTC
TAGCACGAGGGCTTAAGCCGTT
TAGCACGAGGTCAAGGCCTGGA
TAGCACGAGGCTGACGAGAAAC
TAGCACGAGGACCAGTTCACCC
TAGCACGAGGCTTAGACGTCTT
TAGCACGAGGCCGGCATATGAG
TAGCACGAGGACATCTAAGGAG
TAGCACGAGGGGAGTTTGCACA
TAGCACGAGGGTGAGCGATCGA
TAGCACGAGGCAAATGACGGGC
TAGCACGAGGGCTTGATCCCAG
TAGCACGAGGTGACACTGTGCG
TAGCACGAGGCTCAGATAAGGG
TAGCACGAGGCGTATGAACTCC
TAGCACGAGGGCAATCGGAACC
TAGCACGAGGAACTGCGTCTTT
TAGCACGAGGATGACCACCAAT
TAGCACGAGGCTAGATGGCGCA
TAGCACGAGGGGGCTCCGAATA
TAGCACGAGGTGCCTATGGAGT
TAGCACGAGGACATAGTGGCGT
TAGCACGAGGGGGTATCTACCT
TAGCACGAGGTTCAATTGCAGG
TAGCACGAGGATGCTCTGGCTA
TAGCACGAGGGGTAGAGAGCTC
TAGCACGAGGCGAACGATACAG
TAGCACGAGGCCTCGTCAGAAC
TAGCACGAGGCCATTACGATTC
TAGCACGAGGGACAATAGGAGA
TAGCACGAGGGTGAAGCTTATG
TAGCACGAGGGTCGCTAAGTAA
TAGCACGAGGCCGGTACATTCC
TAGCACGAGGCGTGTACTGAAT
TAGCACGAGGTGGGTTTGTACT
TAGCACGAGGGAAAGCATGCGA
TAGCACGAGGAATGGTTCCCTT
TAGCACGAGGCTTGCGTATCAG
TAGCACGAGGCGCCGAATTACT
TAGCACGAGGAGGCTCTGCTGA
TAGCACGAGGCGCGACTTGAGA
TAGCACGAGGTATCAAAGGGTC
TAGCACGAGGGACAATCGAGAA
TAGCACGAGGTGCTGAGTTCCT
TAGCACGAGGCGCTATCTCTTG
TAGCACGAGGTCGAGCATTATG
TAGCACGAGGCGCGATACAAAT
TAGCACGAGGATGTCGCCTGAA
TAGCACGAGGTCACCAAACCGG
TAGCACGAGGATGGACACGTTC
TAGCACGAGGGTCCAGATTTCC
TAGCACGAGGGGATAAAGGGAT
TAGCACGAGGGGAAGCTTATCC
TAGCACGAGGGGTCGACAGAGA
TAGCACGAGGTAGATCCACGTA
TAGCACGAGGTGGCTTCTACCA
TAGCACGAGGAACCACCTAAAG
TAGCACGAGGATCATGCGTAGG
TAGCACGAGGCACCTTACTAGA
TAGCACGAGGGCTTTCCAACGG
TAGCACGAGGGCTATGTCTCTC
TAGCACGAGGCTACATTCACCA
TAGCACGAGGCATGTTCTGTGA
TAGCACGAGGCAGTGATTCTGT
TAGCACGAGGTAACCCAACGAG
TAGCACGAGGCGTCCCTAGAAC
TAGCACGAGGTGCCACTTCGCT
TAGCACGAGGCACCTGTAAGAC
TAGCACGAGGTACCGCTTCCAC
TAGCACGAGGAATGGCTTGTAG
TAGCACGAGGTGGGAGAGTTCT
TAGCACGAGGGAAGCACTCATT
TAGCACGAGGTCGTGGAATTAC
TAGCACGAGGGCGGAACTAGAG
TAGCACGAGGGCTGGTAGATAA
TAGCACGAGGCTTTAGCCCTAT
TAGCACGAGGTAAGACTGAGGG
TAGCACGAGGAGAATGGCACTG
TAGCACGAGGGCTAGCTAGGAT
TAGCACGAGGTGGCTCGACTCA
TAGCACGAGGTCTCTGACTTGA
TAGCACGAGGAGGAACTGTCGT
TAGCACGAGGGTGTGAGCATGC
TAGCACGAGGTAAGATGCTGGG
TAGCACGAGGTGCCTTGTTACC
TAGCACGAGGTGAGCTAGACGC
TAGCACGAGGTGTGACAGGTTC
TAGCACGAGGTCGGTACTAACT
TAGCACGAGGCAGGGTTACTCT
TAGCACGAGGCTTGGATGATGC
TAGCACGAGGGATTCCATTTGG
TAGCACGAGGGTCGAACCTATT
TAGCACGAGGCAAGATTACCCG
TAGCACGAGGGTTTGCCACACA
TAGCACGAGGGAAGCCGTTGGT
TAGCACGAGGGGACGATGTCTG
TAGCACGAGGAAGACACCAACC
TAGCACGAGGGTTACAGAACGC
TAGCACGAGGTCTAATTGCGAC
TAGCACGAGGCAGAATGCCTGA
TAGCACGAGGTCGCGGAAAGTC
TAGCACGAGGTAAGGAGTCTTG
TAGCACGAGGCGACTTGCAAGA
TAGCACGAGGAGAGTTTGAAGG
TAGCACGAGGCTCACAAGCCTA
TAGCACGAGGCCTGATAACCAA
TAGCACGAGGCATCCGTTGACC
TAGCACGAGGGACGTCCCTCAT
TAGCACGAGGTAACGCGTACCC
TAGCACGAGGCGCGTTAATATC
TAGCACGAGGAAACCTAAGTGG
TAGCACGAGGGATATGGTGCCA
TAGCACGAGGCAAGTTAGTGAC
TAGCACGAGGCGCGAGAGCTAT
TAGCACGAGGGATACGCCGTAG
TAGCACGAGGGATGTTTCACCA
TAGCACGAGGTCCTGATTTAGC
TAGCACGAGGACCCGAGTCAGT
TAGCACGAGGTAGGTTGCACTA
TAGCACGAGGGCGCCTGTATAA
TAGCACGAGGAGTCGGTTGTGA
TAGCACGAGGGCTTACAATCGT
TAGCACGAGGCCCAATACGTGG
TAGCACGAGGGATACTTGCTGG
TAGCACGAGGACCCGGTATTCG
TAGCACGAGGGTTGGGCTCAAG
TAGCACGAGGGAGTTATTTCGG
TAGCACGAGGTTTCTGGCGCAG
TAGCACGAGGTACATCACCTCA
TAGCACGAGGACACGCGTGAAC
TAGCACGAGGGCTCAGCGTTTA
TAGCACGAGGGAAGGGTGGTAT
TAGCACGAGGCGGAACTATACT
TAGCACGAGGGGTAATACTCGG
TAGCACGAGGCAGATCGAGGGA
TAGCACGAGGCTTGGCAACAGC
TAGCACGAGGAGGGATGAGTAA
TAGCACGAGGATGGTCATGCGG
TAGCACGAGGAAGCGCCATCGA
TAGCACGAGGGCTAGTCAAGAG
TAGCACGAGGCCATCCTATCGT
TAGCACGAGGGAGCACATCTCC
TAGCACGAGGTACAACGTAGCT
TAGCACGAGGCTGAAGATGTGC
TAGCACGAGGTAGTCCACCAGT
TAGCACGAGGGGATTCAACACG
TAGCACGAGGTTTAACGCCTCT
TAGCACGAGGGGCCATCCACAA
TAGCACGAGGCTTACAATGCGA
TAGCACGAGGCGATATCGATCC
TAGCACGAGGAGTTTGGAGCAT
TAGCACGAGGGTCACGCCCAAT
TAGCACGAGGCTTTAGCTGACT
TAGCACGAGGCCACGTCACTTA
TAGCACGAGGACTAGTCCGGAA
TAGCACGAGGCTCCGATATGAC
TAGCACGAGGGATAGACGAAGA
TAGCACGAGGACGGGTTCTTGT
TAGCACGAGGGTCACCATAGTA
TAGCACGAGGGTTCTTGACAAG
TAGCACGAGGGCTTCTCACAAG
TAGCACGAGGCGACGAAGAAGA
TAGCACGAGGGGCACTTCATCT
TAGCACGAGGATAGCGAGTCAC
TAGCACGAGGGAGGGTATAGTT
TAGCACGAGGATCCGTGGTTGC
TAGCACGAGGGGTGTTCCCTAC
TAGCACGAGGCAACCACGAGTG
TAGCACGAGGAACCGAATTCTC
TAGCACGAGGAAAGGATCGGCT
TAGCACGAGGTGTCAGCACAAT
TAGCACGAGGCCTTCCACCTGT
TAGCACGAGGTTACTTACACCC
TAGCACGAGGTGAAGTTCCGAG
TAGCACGAGGGGCGACCTATGT
TAGCACGAGGTCCAGACGACTT
TAGCACGAGGTACACCAGAGCC
TAGCACGAGGGCAGGATTAAAC
TAGCACGAGGAGTCTGTGTAGA
TAGCACGAGGCTTGAGACTCCG
TAGCACGAGGCTTTGGGACGGT
TAGCACGAGGTCGCGAGATAGT
TAGCACGAGGGTACTTCCTTTC
TAGCACGAGGCAGGCCCAAGAA
TAGCACGAGGAAACCCGAGATA
TAGCACGAGGACATCTCTCCCG
TAGCACGAGGGAATGACTGACA
TAGCACGAGGGAGTCGCATCAG
TAGCACGAGGTATGGTCCAGAC
TAGCACGAGGCACACCTATATC
TAGCACGAGGAACCATGCATGA
TAGCACGAGGTTGTCTCTTGGG
TAGCACGAGGACAGTTAACGGT
TAGCACGAGGCGAAGATCACTC
TAGCACGAGGGCTAAGGATTAG
TAGCACGAGGAAATTGAGGAGG
TAGCACGAGGAATGGCCGTTTC
TAGCACGAGGTTGAGTGCTGTG
TAGCACGAGGACGCGGTATGTA
TAGCACGAGGGCTTCGGAGTCT
TAGCACGAGGTTTCTGCAGACT
TAGCACGAGGCTTCATGTACCT
TAGCACGAGGTCGCTTCCGGTT
TAGCACGAGGCGAAACTTACGG
TAGCACGAGGACAGCGTCACTA
TAGCACGAGGCCTACTAGTTAG
TAGCACGAGGGGATAAAGAAGG
TAGCACGAGGGAACACGTTCCA
TAGCACGAGGGCCTGCTTATGA
TAGCACGAGGAGGCGACTACAC
TAGCACGAGGACGCAAGACGAG
TAGCACGAGGACCAATCGCTTG
TAGCACGAGGGTCAGGGTACTT
TAGCACGAGGTGTCAGGAACAC
TAGCACGAGGGTTCGTGTCCGT
TAGCACGAGGAGAGTGTGCCGT
TAGCACGAGGTTCCAGAGGTCT
TAGCACGAGGACCCGATGGCTA
TAGCACGAGGGGTTTAGTCGTA
TAGCACGAGGCTAATTTGTGGG
TAGCACGAGGAGGGATCCATTA
TAGCACGAGGTTGCATGTACGC
TAGCACGAGGCCACAGCGAAAC
TAGCACGAGGCTAACAGTACTC
TAGCACGAGGGTGTCATGAAAG
TAGCACGAGGAAGTGTCGTGGA
TAGCACGAGGCGACAGTCTTAT
TAGCACGAGGTATGCACCGGAT
TAGCACGAGGCTATGCTTGCCA
TAGCACGAGGTACTAAGCAGTG
TAGCACGAGGAGTGCCTAACAA
TAGCACGAGGGATCCATTCGTG
TAGCACGAGGGTACCTATTCCA
TAGCACGAGGCTGTCTACACGA
TAGCACGAGGATAGGTTTCGCC
TAGCACGAGGAGGTCACGACTA
TAGCACGAGGTACCTCCAACTT
TAGCACGAGGCCACCGCCTTAA
TAGCACGAGGACTCGTTCCGAT
TAGCACGAGGCAATCCTTCAAG
TAGCACGAGGCAATCTGACGTA
TAGCACGAGGATAACCCGCTAA
TAGCACGAGGTAGTCCGAGATC
TAGCACGAGGGGGACAGTGTAT
TAGCACGAGGCGCCACCATTTC
TAGCACGAGGAAATAAGGCCAG
TAGCACGAGGTTTGTGTTACCG
TAGCACGAGGCAGTTATAGGCC
TAGCACGAGGGACGTTGGGATT
TAGCACGAGGTGCCGTGAGACA
TAGCACGAGGTGACCACCAATT
TAGCACGAGGTCTTTGACGCTG
TAGCACGAGGGTTCTCAGTAAG
TAGCACGAGGCTGTTGGTCCTT
TAGCACGAGGATTCATTTCCGC
TAGCACGAGGCACGCAAGGGAA
TAGCACGAGGGGCCTCTGCAAT
TAGCACGAGGCAACCGTACATC
TAGCACGAGGTTGTTCCTCTGC
TAGCACGAGGCTTCTAGGCTAC
TAGCACGAGGGGAACGTCAGTT
TAGCACGAGGAGTGTCGGGTTG
TAGCACGAGGACCCACAGCAGT
TAGCACGAGGATGTCTAACGCC
TAGCACGAGGGGGTTCTAGCCA
TAGCACGAGGTATCCATGACCC
TAGCACGAGGGATTTCCGGACT
TAGCACGAGGTAGGCTAGTTTG
TAGCACGAGGAGCAGGTATGTT
TAGCACGAGGGATGAAATCGGA
TAGCACGAGGCAAGTGTCTGTA
TAGCACGAGGTCGATCCATGGG
TAGCACGAGGTTGATGCGACCA
TAGCACGAGGAACGAGCTGTGA
TAGCACGAGGGGCTGATATGCT
TAGCACGAGGAGGAGTCGGAGA
TAGCACGAGGAATCACGCTTCG
TAGCACGAGGATACTAAGCGCT
TAGCACGAGGATCCAGTCTGCA
TAGCACGAGGGTGCTTTCAACA
TAGCACGAGGTACGATCTATCG
TAGCACGAGGCGAAGGAAGCCA
TAGCACGAGGGCAGCTGATGTG
TAGCACGAGGCTGGGAAATGTT
TAGCACGAGGTGATCACTGCAT
TAGCACGAGGTTCTCATGGTCA
TAGCACGAGGTACAGCGCCGTT
TAGCACGAGGGTCCTATGTCCG
TAGCACGAGGATAAGGTCCTGA
TAGCACGAGGTCTATGCGTACC
TAGCACGAGGGACTTACTGCCG
TAGCACGAGGTTCGGTTCCCAC
TAGCACGAGGCTTAGCGTGAGT
TAGCACGAGGCCTGGGTTAATC
TAGCACGAGGCGCAAGTAAAGC
TAGCACGAGGCACCATTTACCC
TAGCACGAGGTCGCGATCTGAC
TAGCACGAGGGTACAACTCTAG
TAGCACGAGGTGGAACAGTCTG
TAGCACGAGGTCTGTACGCTGA
TAGCACGAGGATTGCCTTCTTC
TAGCACGAGGTACGGCTTTCCT
TAGCACGAGGAGATTTGAGTCC
TAGCACGAGGTAAACGCTCCAG
TAGCACGAGGAAGCCCATTGCC
TAGCACGAGGACTAACGGTATC
TAGCACGAGGTGGCCAGTACTA
TAGCACGAGGTTTACCCGTCGA
TAGCACGAGGAGGGAATGTTCA
TAGCACGAGGTCATTCACGAAG
TAGCACGAGGGCGCAGTTTATA
TAGCACGAGGTCGTTTCGCACG
TAGCACGAGGCAGTCGTGAGGA
TAGCACGAGGGTGCCTTTAAGC
TAGCACGAGGGTTATCAGGGCC
TAGCACGAGGACGGTTCCTAGG
TAGCACGAGGATTACTCGTGGG
TAGCACGAGGTCGCGCTTGACA
TAGCACGAGGTGCGAAGCTCAC
TAGCACGAGGAAGCTCAACGCA
TAGCACGAGGCAGTTGACGCTC
TAGCACGAGGCTAATCCAGATG
TAGCACGAGGGGGAACAAGTCA
TAGCACGAGGGACGGAGAACCT
TAGCACGAGGACCACTATTCAC
TAGCACGAGGCCCATGACGGAA
TAGCACGAGGTTCCTCAGCCTC
TAGCACGAGGCACGTTCCAGCA
TAGCACGAGGTGCACGTTAACC
TAGCACGAGGGGGCTAGGAGAT
TAGCACGAGGTGACTATTTCCC
TAGCACGAGGGTCTCTGCTATT
TAGCACGAGGATCGAGGCCTAA
TAGCACGAGGAAAGCCCACGAC
TAGCACGAGGCGTAAGGCTAAC
TAGCACGAGGTATAAGTGCTCC
TAGCACGAGGGACATCGAGTAG
TAGCACGAGGCGTACTTCCTCG
TAGCACGAGGAAAGGGATGCCA
TAGCACGAGGTTGACAAGTCCT
TAGCACGAGGATCTCGCCACTT
TAGCACGAGGCAGAATCCTTCC
TAGCACGAGGCACTTCTCCTAC
TAGCACGAGGGATCTACGCCGT
TAGCACGAGGCGCTGATGATGA
TAGCACGAGGAGGTCCCAATCG
TAGCACGAGGTGCGTCGAGTAC
TAGCACGAGGTTTCCACGCAGT
TAGCACGAGGAGCGAATAACCC
TAGCACGAGGGGAACGGTCTCA
TAGCACGAGGACCACGAAGGGA
TAGCACGAGGAATCGTCTGGAC
TAGCACGAGGAGCATACTCAGC
TAGCACGAGGTAGATCTGCCAA
TAGCACGAGGCAGCGTTGGTAC
TAGCACGAGGTAGTTGGTTGGA
TAGCACGAGGGAGAACGTCATA
TAGCACGAGGGAAGGACCTAGT
TAGCACGAGGTACGTGCAGTAT
TAGCACGAGGTTGTCATGCGTG
TAGCACGAGGCTCGACTTTCAC
TAGCACGAGGGTCAATTCTCAG
TAGCACGAGGTCATCCGCGACA
TAGCACGAGGGTCCCAATGACT
TAGCACGAGGTGCAGATCGGCT
TAGCACGAGGGGATACTCGTGA
GCGGATCGATAGCAGTTGGTGG
GCGGATCGATAGGTTATCGATC
GCGGATCGATACGTCGAGTCCA
GCGGATCGATCTACTCGATCTC
GCGGATCGATATTTGCCCAGCT
GCGGATCGATCTAAGAGCTCAA
GCGGATCGATCGTCCAAAGGTC
GCGGATCGATCTAAGGTCAGAA
GCGGATCGATAATTAGAAGGGC
GCGGATCGATCATCCTCCACTC
GCGGATCGATACGCGATCAGTT
GCGGATCGATTTAGGCAATGTC
GCGGATCGATAAGCTCTCTGAT
GCGGATCGATCCTCATAGTAGA
GCGGATCGATCATCTCGACAAT
GCGGATCGATACAACAGCGGAT
GCGGATCGATCTGGGCTTGGTA
GCGGATCGATCAAACACCACAT
GCGGATCGATAACTGATAGGAG
GCGGATCGATGGTTATGAGTCG
GCGGATCGATATAGCTGTGTCT
GCGGATCGATGTTGTGATGTGC
GCGGATCGATCGTCAATAGCTG
GCGGATCGATGTGCACCATGTG
GCGGATCGATTACCCAATGAAC
GCGGATCGATGGTCGTCAATCA
GCGGATCGATAGATACCTGGAG
GCGGATCGATTCGACCAGATCT
GCGGATCGATGCGGATAGTAGG
GCGGATCGATAAACGGATCAGT
GCGGATCGATAGCCATGAGAAT
GCGGATCGATCGAGACGTTTAA
GCGGATCGATGCTGTAAACGGC
GCGGATCGATTCCCTATAGCCA
GCGGATCGATCAGCAACCGATC
GCGGATCGATTGTTCGGATTAG
GCGGATCGATCAAATCGAAAGC
GCGGATCGATGACGCAACCTCT
GCGGATCGATGCTGATCCACCT
GCGGATCGATATAACGCAAGTC
GCGGATCGATCCTCTGAAAGTT
GCGGATCGATTGGTCGTGCCAT
GCGGATCGATCGATGTCCAAGT
GCGGATCGATGCTTCATGAACC
GCGGATCGATTGCGTGCAGACA
GCGGATCGATTTCTAACGCTTC
GCGGATCGATTCTATCGACACA
GCGGATCGATAATGGAGCAACA
GCGGATCGATATTAGGAGGTCT
GCGGATCGATAGCTAGGGTGCT
GCGGATCGATCGTAGGATTCTG
GCGGATCGATACAGATCAACGC
GCGGATCGATTCGAGTTACTAG
GCGGATCGATACGCCGTGACTT
GCGGATCGATAGGTGTGACCGT
GCGGATCGATTATGATGTTCCC
GCGGATCGATCTTCGCGTAACG
GCGGATCGATTTCGCTGACAGA
GCGGATCGATCGATTTCACCGA
GCGGATCGATTGGTATGGAGGT
GCGGATCGATATCGAGTTAGGC
GCGGATCGATAGATCTGTGACG
GCGGATCGATTGCTAGCCTATA
GCGGATCGATATGTGCCTTCTG
GCGGATCGATACTCTTCCTCAT
GCGGATCGATTGGGATTGACAG
GCGGATCGATAACGTGATTTGG
GCGGATCGATGGAGGTTACTAT
GCGGATCGATGCATGTATCCTT
GCGGATCGATATGTGCATCTGG
GCGGATCGATAAAGTCGCGTGT
GCGGATCGATGGGCTACAGTTC
GCGGATCGATCCTACCGTTAAT
GCGGATCGATGACGGCATAATG
GCGGATCGATTGTCCTGCGGTA
GCGGATCGATCGACATCTGGAT
GCGGATCGATATGCGTATTCCC
GCGGATCGATAAGCGGAACCTA
GCGGATCGATCGGAACATTGTA
GCGGATCGATGTGCTCCTAAGG
GCGGATCGATACCGTCCCATTC
GCGGATCGATTGCTATCGGACG
GCGGATCGATTTAGGATGCGCG
GCGGATCGATATCAGTCAAGGA
GCGGATCGATCACAACCATGAT
GCGGATCGATCATGTCCGAGTC
GCGGATCGATTTATGGTAGACC
GCGGATCGATTATACGAACCCG
GCGGATCGATAACTAACGTCGA
GCGGATCGATGGTAAATCTCCC
GCGGATCGATGCTACAATGTGG
GCGGATCGATTACACTCCACAA
GCGGATCGATTAGATACATCCC
GCGGATCGATGTTGTACGAGCC
GCGGATCGATTTTCGCGTGTAA
GCGGATCGATCGTTCGTTTATG
GCGGATCGATTGGTGAGGTGAT
GCGGATCGATATTGGACTTAGC
GCGGATCGATTGGACATACTGG
GCGGATCGATTTGGCTGTCTGT
GCGGATCGATCTCCCGTGTAAG
GCGGATCGATCAATCTGGGTGT
GCGGATCGATGGAAGTTCAGCA
GCGGATCGATCACCATGCCATT
GCGGATCGATCCGTGAAAGACC
GCGGATCGATTGCAGAACAGTG
GCGGATCGATTGGGAATGAGGA
GCGGATCGATTAGACTGGACCA
GCGGATCGATGGTAGTCGAAAC
GCGGATCGATCTGCTGGGTTCA
GCGGATCGATGGACCGACAATG
GCGGATCGATACGTCCGTAATT
GCGGATCGATACTTGAGTCATC
GCGGATCGATTCACAGTGATAG
GCGGATCGATGGGTACAGCTTC
GCGGATCGATTTCTGCTGGAGA
GCGGATCGATCTCGTAGAGCGT
GCGGATCGATTCTGACGGGACT
GCGGATCGATCAGACCTGCTCA
GCGGATCGATCTCACTGGATAT
GCGGATCGATTACTAGGGTTAG
GCGGATCGATTAGGTAAGACCA
GCGGATCGATGTCAGTAGTCTG
GCGGATCGATACGATCCGCACT
GCGGATCGATTGGACGACGATC
GCGGATCGATACTGGATATGCT
GCGGATCGATGTGACGCGGTAT
GCGGATCGATCGTTTATCACAC
GCGGATCGATGGCATAATGATC
GCGGATCGATCGATTGGCGATA
GCGGATCGATCGTCGTGAAATT
GCGGATCGATACCACGCAAACT
GCGGATCGATAGATGCCGATGT
GCGGATCGATGTGTTAGGCAAT
GCGGATCGATTCTTCCTGCAAC
GCGGATCGATCTTAGCAAAGAG
GCGGATCGATTTACAGCACCGG
GCGGATCGATAGATCGTTTGGC
GCGGATCGATAGATTGGACAAG
GCGGATCGATCACAAATCAACC
GCGGATCGATAAAGGAACAGAC
GCGGATCGATCACTGTGTTATG
GCGGATCGATGTTGGCTATCAA
GCGGATCGATCTCATGTAGTCT
GCGGATCGATAGCATGCGCTTT
GCGGATCGATGTTGGTCTACTA
GCGGATCGATGTCGACAGATAG
GCGGATCGATAGGAACGCCGAT
GCGGATCGATCCGGAGAATACC
GCGGATCGATTCAGCCCAAGTT
GCGGATCGATATCATTGAGGCT
GCGGATCGATAAGCTAACGCAC
GCGGATCGATTTAAACGCGAAG
GCGGATCGATTTAGCTTCTCTG
GCGGATCGATTTAGGTAGCAAC
GCGGATCGATCCTAATCCTGAG
GCGGATCGATAGGCGGCATTAC
GCGGATCGATGAGCATCACTAC
GCGGATCGATGTGCAATGTCGT
GCGGATCGATCGGTGATGACTT
GCGGATCGATCGACGCCTTATG
GCGGATCGATCAAACAAGAAGG
GCGGATCGATTGTGATTCTGTG
GCGGATCGATATAGGATGGCTC
GCGGATCGATGTACTGGACCCT
GCGGATCGATTGTTACTTCCCG
GCGGATCGATGCAGAGAGAGAA
GCGGATCGATGATGGCATCAAA
GCGGATCGATATTTAGGGCGGG
GCGGATCGATCTTGCGGGTGTT
GCGGATCGATCCTTTCCGTATC
GCGGATCGATAAAGCGGGAGCT
GCGGATCGATTTAGTGCTAGCA
GCGGATCGATCTAAATGTTCGG
GCGGATCGATCCCAAGATCGAC
GCGGATCGATGAGTGGTTGACC
GCGGATCGATTTCCGCTGATAT
GCGGATCGATCGGCGACTAACA
GCGGATCGATTGGGCACATTAG
GCGGATCGATTGTTTCCGTTGC
GCGGATCGATCCTTTCGGCAGT
GCGGATCGATAACCGCTAATGA
GCGGATCGATCTTAGGTAGCGT
GCGGATCGATGCCACCTGATAC
GCGGATCGATACAGAAGGACCT
GCGGATCGATCATACCCGGTTC
GCGGATCGATAGTACGGAAAGC
GCGGATCGATATCCAAGCCGTC
GCGGATCGATCCATCTCTGGGA
GCGGATCGATTTGGTGATGTCT
GCGGATCGATCTTGCTGCCTAT
GCGGATCGATTACCATCCCAGG
GCGGATCGATCGCCCTGCTATA
GCGGATCGATCCTGTAGTGGCA
GCGGATCGATTTTGCCGGAAGG
GCGGATCGATGCTATTGGTAGG
GCGGATCGATGAGTGTGGCATA
GCGGATCGATACGCTTACCCGA
GCGGATCGATTTCAGTCGCCTA
GCGGATCGATCAACGGCATGAG
GCGGATCGATAGTGTCAGTCAA
GCGGATCGATCGATTCCGGCAT
GCGGATCGATGGATTGTTTCTG
GCGGATCGATAATCGAACACGT
GCGGATCGATCGAAGGTTCGAT
GCGGATCGATAATCGCTGGATG
GCGGATCGATAACTTGCTCACC
GCGGATCGATTGCGCCAATCGT
GCGGATCGATGTTGCGAATGGG
GCGGATCGATCGAAGGGATCAT
GCGGATCGATTTGCTGGATCGT
GCGGATCGATGATGGCAAACAT
GCGGATCGATAAACGTCCCGTT
GCGGATCGATCTGCGCTTATCC
GCGGATCGATTAGTCAGCGTGG
GCGGATCGATCTATCCCATCCG
GCGGATCGATACATGCCGTGCT
GCGGATCGATTGCTAATGACGT
GCGGATCGATAACAGGCGGGTA
GCGGATCGATTAGAGAGGCTGC
GCGGATCGATGCACACTCTCCT
GCGGATCGATCAGATCCGTGAC
GCGGATCGATTCCGTAAGGTTC
GCGGATCGATTTAGGTAGTGGG
GCGGATCGATAATATAGGTCCG
GCGGATCGATAGCCTCACCATC
GCGGATCGATGGTTGTTCCATC
GCGGATCGATTTGAGCCCGGAT
GCGGATCGATGAGATAGTACTG
GCGGATCGATAAACTAGCCCTA
GCGGATCGATTGGAGTAACCAT
GCGGATCGATGACCAGACCTGT
GCGGATCGATGAGGGTGATTGC
GCGGATCGATCGCTGAGCCAAT
GCGGATCGATTTAGAGCCCACT
GCGGATCGATAATTCTGTTGCG
GCGGATCGATCTCATCTACGTC
GCGGATCGATGGGACTAATTCC
GCGGATCGATAACTTCGACCAG
GCGGATCGATGTATATCCGGAA
GCGGATCGATTTCCGAGCAACT
GCGGATCGATGCCCGTGTTGAT
GCGGATCGATTGCCGTCTCAAC
GCGGATCGATTATCGCCGGGTA
GCGGATCGATGTCATAGCGTGT
GCGGATCGATCGCGCTATACGA
GCGGATCGATTGCAAGTGCACT
GCGGATCGATACTGCACGCCAT
GCGGATCGATCAGCGAAGACCT
GCGGATCGATACGCATAGGCAC
GCGGATCGATATTTCGATGACG
GCGGATCGATAAGCGGGCTTGA
GCGGATCGATTGTGACTTAGGC
GCGGATCGATTTTCGAAGAAGG
GCGGATCGATCATTAGTGTACC
GCGGATCGATTAGGCAGATGGA
GCGGATCGATCCAGCTTTCCGT
GCGGATCGATGTAACTTGCCCT
GCGGATCGATGGATCAACTATC
GCGGATCGATTCCACTTGGATA
GCGGATCGATTGCGATCGTTAG
GCGGATCGATGTCCGGTCCAAA
GCGGATCGATGCGTTATTGTGC
GCGGATCGATAACGACTGCTCG
GCGGATCGATTAGCGTCATATG
GCGGATCGATGGACTTCTAGTT
GCGGATCGATCCCTGGCAGTAT
GCGGATCGATTCCACATCACTG
GCGGATCGATTGAACCATCGTA
GCGGATCGATGTCCACCTAGAC
GCGGATCGATGAACCTCAGGCT
GCGGATCGATCCCATCTGGAGA
GCGGATCGATGATCAGTAGGAT
GCGGATCGATGGTGTCGGTTGT
GCGGATCGATCCTATTGAAGCC
GCGGATCGATGATTCGCGTGCA
GCGGATCGATAACATGAAGCGC
GCGGATCGATGTTACCCTCGGA
GCGGATCGATCGTGATGAGGTA
GCGGATCGATGTTGGAGACTAA
GCGGATCGATCGACGAGAGATC
GCGGATCGATGGCGGGATATTC
GCGGATCGATCCTTAAGTAGTC
GCGGATCGATATAGCCTCCGTA
GCGGATCGATGGCGTACTTCTA
GCGGATCGATCCACTCTAGGTC
GCGGATCGATGCTTTCAGCCAG
GCGGATCGATGATGAACATGTC
GCGGATCGATCCTAAGCTAGCT
GCGGATCGATGGTGGCCGTATA
GCGGATCGATGAGGAATCACGG
GCGGATCGATGCGCACGGTAAA
GCGGATCGATGAAGTTCTTAGG
GCGGATCGATACCCACATGCTT
GCGGATCGATATTTGGCCTCTA
GCGGATCGATGACATTTGACAG
GCGGATCGATTGACACAGCGAC
GCGGATCGATAGGGACGGATTC
GCGGATCGATGGTCTAATTAGG
GCGGATCGATGCCTTAGCTAGC
GCGGATCGATCGGATCACCTGA
GCGGATCGATGCGATGTACGAC
GCGGATCGATAGTCCTGGTACT
GCGGATCGATCAAATCTCGCCG
GCGGATCGATCTGTGAAGAGAA
GCGGATCGATTAACAGTGCCTT
GCGGATCGATCTTCCTGCTGTC
GCGGATCGATTCCTTAGTCGGG
GCGGATCGATAACCCACTATCT
GCGGATCGATTCTAATGCCTGC
GCGGATCGATCAGCTCAGGACA
GCGGATCGATGCGACGTTACGA
GCGGATCGATTTCACTACGTAG
GCGGATCGATGTGTCGAAGCTC
GCGGATCGATGGGCGTATTTGA
GCGGATCGATTCCGCGGCTTAA
GCGGATCGATAAGTAGCCCGCT
GCGGATCGATTTGTCCTCGACG
GCGGATCGATTGAACCTGATCG
GCGGATCGATGAGAGGTCCACT
GCGGATCGATAAAGCACTAGCG
GCGGATCGATTAAGTAATCCCG
GCGGATCGATTACAACCCGATG
GCGGATCGATGGAGTGTTGGAA
GCGGATCGATGCGTAACCAGTA
GCGGATCGATGCCTAAACGAAG
GCGGATCGATATCGTACCCGTT
GCGGATCGATCGAGAATCGACG
GCGGATCGATAAGTTGTGCTAC
GCGGATCGATGTAGCCTGTTAC
GCGGATCGATTGTTTCGGTACA
GCGGATCGATGTGCAAACCACT
GCGGATCGATGTACATAGATCC
GCGGATCGATGCTCTTTCAGAA
GCGGATCGATGGGCATAAACGT
GCGGATCGATCGTGCAACACAA
GCGGATCGATTAGCATCGATGC
GCGGATCGATGCGTGCTACCAA
GCGGATCGATCTAGACGACCTG
GCGGATCGATGCGAACGTAGAC
GCGGATCGATAAGGGCAAATCA
GCGGATCGATGCTCCGGAAATT
GCGGATCGATGTATGCCGAGAA
GCGGATCGATCTTTAACTGCGC
GCGGATCGATATGCGTAGCTGA
GCGGATCGATGATAGGTGTAGC
GCGGATCGATCCGGATCAAGTT
GCGGATCGATTAAAGCCGGTGC
GCGGATCGATTCAGGGAAAGCG
GCGGATCGATCATCCTCATCAA
GCGGATCGATGAAGTCGTAGTA
GCGGATCGATACATGGCAAGCC
GCGGATCGATTGAACGCAATCC
GCGGATCGATAGGTGCAAGGTA
GCGGATCGATGGGCAGTGGTAA
GCGGATCGATACGTACGGTCAT
GCGGATCGATTCCCTAACCATA
GCGGATCGATGCTTTGCGTCGT
GCGGATCGATACTCATCGTCTC
GCGGATCGATACATCCGGTCTC
GCGGATCGATTCCACACCTCCA
GCGGATCGATACTGCGACAAAG
GCGGATCGATGTAGGTACTAGC
GCGGATCGATATAGGTGGTACC
GCGGATCGATACCACGGCTGTT
GCGGATCGATAGGCATGCAGAG
GCGGATCGATCACCGAAGGTCA
GCGGATCGATACCTCACTCGAA
GCGGATCGATCTAGGCCTTTGA
GCGGATCGATAGACTAGGAGGA
GCGGATCGATTTAGGGACCCTC
GCGGATCGATTGTTCTCTCTGG
GCGGATCGATATTGGGCTAGTT
GCGGATCGATACTCCGATGGAC
GCGGATCGATACAGGGCCTCTT
GCGGATCGATTCAGCATTTAGG
GCGGATCGATGTGTAACGCGGT
GCGGATCGATCAGAAGGTTGTT
GCGGATCGATGAATCGGTGTTC
GCGGATCGATGAATCAGCTTGA
GCGGATCGATTGCGTTGATGTG
GCGGATCGATATGGACGATCGT
GCGGATCGATCCTTATATGTCC
GCGGATCGATAATCCCGCGCTT
GCGGATCGATCACCGTATGTTC
GCGGATCGATGAGGCATTTGCA
GCGGATCGATGTACATCTTCAC
GCGGATCGATGGGATTAGCTGC
GCGGATCGATGGGTTGAACCTA
GCGGATCGATTCGTCACTTAAG
GCGGATCGATTCGCTTAGCCTT
GCGGATCGATAAATGCTACGGG
GCGGATCGATGTGTTTGTGAGC
GCGGATCGATCTGGTAGCGTAT
GCGGATCGATTAAGTGGGTCGA
GCGGATCGATTTTACCACGCCA
GCGGATCGATAGGCTGCGTCTA
GCGGATCGATGGTTGTCCTCTG
GCGGATCGATGTTCTGAGCGAC
GCGGATCGATACCCGAACTCAT
GCGGATCGATAGCGGCTGAAAC
GCGGATCGATGAGACAATGACG
GCGGATCGATGTTCTCCTACTC
GCGGATCGATGCTTAAGCCGTT
GCGGATCGATTCAAGGCCTGGA
GCGGATCGATCTGACGAGAAAC
GCGGATCGATACCAGTTCACCC
GCGGATCGATCTTAGACGTCTT
GCGGATCGATCCGGCATATGAG
GCGGATCGATACATCTAAGGAG
GCGGATCGATGGAGTTTGCACA
GCGGATCGATGTGAGCGATCGA
GCGGATCGATCAAATGACGGGC
GCGGATCGATGCTTGATCCCAG
GCGGATCGATTGACACTGTGCG
GCGGATCGATCTCAGATAAGGG
GCGGATCGATCGTATGAACTCC
GCGGATCGATGCAATCGGAACC
GCGGATCGATAACTGCGTCTTT
GCGGATCGATATGACCACCAAT
GCGGATCGATCTAGATGGCGCA
GCGGATCGATGGGCTCCGAATA
GCGGATCGATTGCCTATGGAGT
GCGGATCGATACATAGTGGCGT
GCGGATCGATGGGTATCTACCT
GCGGATCGATTTCAATTGCAGG
GCGGATCGATATGCTCTGGCTA
GCGGATCGATGGTAGAGAGCTC
GCGGATCGATCGAACGATACAG
GCGGATCGATCCTCGTCAGAAC
GCGGATCGATCCATTACGATTC
GCGGATCGATGACAATAGGAGA
GCGGATCGATGTGAAGCTTATG
GCGGATCGATGTCGCTAAGTAA
GCGGATCGATCCGGTACATTCC
GCGGATCGATCGTGTACTGAAT
GCGGATCGATTGGGTTTGTACT
GCGGATCGATGAAAGCATGCGA
GCGGATCGATAATGGTTCCCTT
GCGGATCGATCTTGCGTATCAG
GCGGATCGATCGCCGAATTACT
GCGGATCGATAGGCTCTGCTGA
GCGGATCGATCGCGACTTGAGA
GCGGATCGATTATCAAAGGGTC
GCGGATCGATGACAATCGAGAA
GCGGATCGATTGCTGAGTTCCT
GCGGATCGATCGCTATCTCTTG
GCGGATCGATTCGAGCATTATG
GCGGATCGATCGCGATACAAAT
GCGGATCGATATGTCGCCTGAA
GCGGATCGATTCACCAAACCGG
GCGGATCGATATGGACACGTTC
GCGGATCGATGTCCAGATTTCC
GCGGATCGATGGATAAAGGGAT
GCGGATCGATGGAAGCTTATCC
GCGGATCGATGGTCGACAGAGA
GCGGATCGATTAGATCCACGTA
GCGGATCGATTGGCTTCTACCA
GCGGATCGATAACCACCTAAAG
GCGGATCGATATCATGCGTAGG
GCGGATCGATCACCTTACTAGA
GCGGATCGATGCTTTCCAACGG
GCGGATCGATGCTATGTCTCTC
GCGGATCGATCTACATTCACCA
GCGGATCGATCATGTTCTGTGA
GCGGATCGATCAGTGATTCTGT
GCGGATCGATTAACCCAACGAG
GCGGATCGATCGTCCCTAGAAC
GCGGATCGATTGCCACTTCGCT
GCGGATCGATCACCTGTAAGAC
GCGGATCGATTACCGCTTCCAC
GCGGATCGATAATGGCTTGTAG
GCGGATCGATTGGGAGAGTTCT
GCGGATCGATGAAGCACTCATT
GCGGATCGATTCGTGGAATTAC
GCGGATCGATGCGGAACTAGAG
GCGGATCGATGCTGGTAGATAA
GCGGATCGATCTTTAGCCCTAT
GCGGATCGATTAAGACTGAGGG
GCGGATCGATAGAATGGCACTG
GCGGATCGATGCTAGCTAGGAT
GCGGATCGATTGGCTCGACTCA
GCGGATCGATTCTCTGACTTGA
GCGGATCGATAGGAACTGTCGT
GCGGATCGATGTGTGAGCATGC
GCGGATCGATTAAGATGCTGGG
GCGGATCGATTGCCTTGTTACC
GCGGATCGATTGAGCTAGACGC
GCGGATCGATTGTGACAGGTTC
GCGGATCGATTCGGTACTAACT
GCGGATCGATCAGGGTTACTCT
GCGGATCGATCTTGGATGATGC
GCGGATCGATGATTCCATTTGG
GCGGATCGATGTCGAACCTATT
GCGGATCGATCAAGATTACCCG
GCGGATCGATGTTTGCCACACA
GCGGATCGATGAAGCCGTTGGT
GCGGATCGATGGACGATGTCTG
GCGGATCGATAAGACACCAACC
GCGGATCGATGTTACAGAACGC
GCGGATCGATTCTAATTGCGAC
GCGGATCGATCAGAATGCCTGA
GCGGATCGATTCGCGGAAAGTC
GCGGATCGATTAAGGAGTCTTG
GCGGATCGATCGACTTGCAAGA
GCGGATCGATAGAGTTTGAAGG
GCGGATCGATCTCACAAGCCTA
GCGGATCGATCCTGATAACCAA
GCGGATCGATCATCCGTTGACC
GCGGATCGATGACGTCCCTCAT
GCGGATCGATTAACGCGTACCC
GCGGATCGATCGCGTTAATATC
GCGGATCGATAAACCTAAGTGG
GCGGATCGATGATATGGTGCCA
GCGGATCGATCAAGTTAGTGAC
GCGGATCGATCGCGAGAGCTAT
GCGGATCGATGATACGCCGTAG
GCGGATCGATGATGTTTCACCA
GCGGATCGATTCCTGATTTAGC
GCGGATCGATACCCGAGTCAGT
GCGGATCGATTAGGTTGCACTA
GCGGATCGATGCGCCTGTATAA
GCGGATCGATAGTCGGTTGTGA
GCGGATCGATGCTTACAATCGT
GCGGATCGATCCCAATACGTGG
GCGGATCGATGATACTTGCTGG
GCGGATCGATACCCGGTATTCG
GCGGATCGATGTTGGGCTCAAG
GCGGATCGATGAGTTATTTCGG
GCGGATCGATTTTCTGGCGCAG
GCGGATCGATTACATCACCTCA
GCGGATCGATACACGCGTGAAC
GCGGATCGATGCTCAGCGTTTA
GCGGATCGATGAAGGGTGGTAT
GCGGATCGATCGGAACTATACT
GCGGATCGATGGTAATACTCGG
GCGGATCGATCAGATCGAGGGA
GCGGATCGATCTTGGCAACAGC
GCGGATCGATAGGGATGAGTAA
GCGGATCGATATGGTCATGCGG
GCGGATCGATAAGCGCCATCGA
GCGGATCGATGCTAGTCAAGAG
GCGGATCGATCCATCCTATCGT
GCGGATCGATGAGCACATCTCC
GCGGATCGATTACAACGTAGCT
GCGGATCGATCTGAAGATGTGC
GCGGATCGATTAGTCCACCAGT
GCGGATCGATGGATTCAACACG
GCGGATCGATTTTAACGCCTCT
GCGGATCGATGGCCATCCACAA
GCGGATCGATCTTACAATGCGA
GCGGATCGATCGATATCGATCC
GCGGATCGATAGTTTGGAGCAT
GCGGATCGATGTCACGCCCAAT
GCGGATCGATCTTTAGCTGACT
GCGGATCGATCCACGTCACTTA
GCGGATCGATACTAGTCCGGAA
GCGGATCGATCTCCGATATGAC
GCGGATCGATGATAGACGAAGA
GCGGATCGATACGGGTTCTTGT
GCGGATCGATGTCACCATAGTA
GCGGATCGATGTTCTTGACAAG
GCGGATCGATGCTTCTCACAAG
GCGGATCGATCGACGAAGAAGA
GCGGATCGATGGCACTTCATCT
GCGGATCGATATAGCGAGTCAC
GCGGATCGATGAGGGTATAGTT
GCGGATCGATATCCGTGGTTGC
GCGGATCGATGGTGTTCCCTAC
GCGGATCGATCAACCACGAGTG
GCGGATCGATAACCGAATTCTC
GCGGATCGATAAAGGATCGGCT
GCGGATCGATTGTCAGCACAAT
GCGGATCGATCCTTCCACCTGT
GCGGATCGATTTACTTACACCC
GCGGATCGATTGAAGTTCCGAG
GCGGATCGATGGCGACCTATGT
GCGGATCGATTCCAGACGACTT
GCGGATCGATTACACCAGAGCC
GCGGATCGATGCAGGATTAAAC
GCGGATCGATAGTCTGTGTAGA
GCGGATCGATCTTGAGACTCCG
GCGGATCGATCTTTGGGACGGT
GCGGATCGATTCGCGAGATAGT
GCGGATCGATGTACTTCCTTTC
GCGGATCGATCAGGCCCAAGAA
GCGGATCGATAAACCCGAGATA
GCGGATCGATACATCTCTCCCG
GCGGATCGATGAATGACTGACA
GCGGATCGATGAGTCGCATCAG
GCGGATCGATTATGGTCCAGAC
GCGGATCGATCACACCTATATC
GCGGATCGATAACCATGCATGA
GCGGATCGATTTGTCTCTTGGG
GCGGATCGATACAGTTAACGGT
GCGGATCGATCGAAGATCACTC
GCGGATCGATGCTAAGGATTAG
GCGGATCGATAAATTGAGGAGG
GCGGATCGATAATGGCCGTTTC
GCGGATCGATTTGAGTGCTGTG
GCGGATCGATACGCGGTATGTA
GCGGATCGATGCTTCGGAGTCT
GCGGATCGATTTTCTGCAGACT
GCGGATCGATCTTCATGTACCT
GCGGATCGATTCGCTTCCGGTT
GCGGATCGATCGAAACTTACGG
GCGGATCGATACAGCGTCACTA
GCGGATCGATCCTACTAGTTAG
GCGGATCGATGGATAAAGAAGG
GCGGATCGATGAACACGTTCCA
GCGGATCGATGCCTGCTTATGA
GCGGATCGATAGGCGACTACAC
GCGGATCGATACGCAAGACGAG
GCGGATCGATACCAATCGCTTG
GCGGATCGATGTCAGGGTACTT
GCGGATCGATTGTCAGGAACAC
GCGGATCGATGTTCGTGTCCGT
GCGGATCGATAGAGTGTGCCGT
GCGGATCGATTTCCAGAGGTCT
GCGGATCGATACCCGATGGCTA
GCGGATCGATGGTTTAGTCGTA
GCGGATCGATCTAATTTGTGGG
GCGGATCGATAGGGATCCATTA
GCGGATCGATTTGCATGTACGC
GCGGATCGATCCACAGCGAAAC
GCGGATCGATCTAACAGTACTC
GCGGATCGATGTGTCATGAAAG
GCGGATCGATAAGTGTCGTGGA
GCGGATCGATCGACAGTCTTAT
GCGGATCGATTATGCACCGGAT
GCGGATCGATCTATGCTTGCCA
GCGGATCGATTACTAAGCAGTG
GCGGATCGATAGTGCCTAACAA
GCGGATCGATGATCCATTCGTG
GCGGATCGATGTACCTATTCCA
GCGGATCGATCTGTCTACACGA
GCGGATCGATATAGGTTTCGCC
GCGGATCGATAGGTCACGACTA
GCGGATCGATTACCTCCAACTT
GCGGATCGATCCACCGCCTTAA
GCGGATCGATACTCGTTCCGAT
GCGGATCGATCAATCCTTCAAG
GCGGATCGATCAATCTGACGTA
GCGGATCGATATAACCCGCTAA
GCGGATCGATTAGTCCGAGATC
GCGGATCGATGGGACAGTGTAT
GCGGATCGATCGCCACCATTTC
GCGGATCGATAAATAAGGCCAG
GCGGATCGATTTTGTGTTACCG
GCGGATCGATCAGTTATAGGCC
GCGGATCGATGACGTTGGGATT
GCGGATCGATTGCCGTGAGACA
GCGGATCGATTGACCACCAATT
GCGGATCGATTCTTTGACGCTG
GCGGATCGATGTTCTCAGTAAG
GCGGATCGATCTGTTGGTCCTT
GCGGATCGATATTCATTTCCGC
GCGGATCGATCACGCAAGGGAA
GCGGATCGATGGCCTCTGCAAT
GCGGATCGATCAACCGTACATC
GCGGATCGATTTGTTCCTCTGC
GCGGATCGATCTTCTAGGCTAC
GCGGATCGATGGAACGTCAGTT
GCGGATCGATAGTGTCGGGTTG
GCGGATCGATACCCACAGCAGT
GCGGATCGATATGTCTAACGCC
GCGGATCGATGGGTTCTAGCCA
GCGGATCGATTATCCATGACCC
GCGGATCGATGATTTCCGGACT
GCGGATCGATTAGGCTAGTTTG
GCGGATCGATAGCAGGTATGTT
GCGGATCGATGATGAAATCGGA
GCGGATCGATCAAGTGTCTGTA
GCGGATCGATTCGATCCATGGG
GCGGATCGATTTGATGCGACCA
GCGGATCGATAACGAGCTGTGA
GCGGATCGATGGCTGATATGCT
GCGGATCGATAGGAGTCGGAGA
GCGGATCGATAATCACGCTTCG
GCGGATCGATATACTAAGCGCT
GCGGATCGATATCCAGTCTGCA
GCGGATCGATGTGCTTTCAACA
GCGGATCGATTACGATCTATCG
GCGGATCGATCGAAGGAAGCCA
GCGGATCGATGCAGCTGATGTG
GCGGATCGATCTGGGAAATGTT
GCGGATCGATTGATCACTGCAT
GCGGATCGATTTCTCATGGTCA
GCGGATCGATTACAGCGCCGTT
GCGGATCGATGTCCTATGTCCG
GCGGATCGATATAAGGTCCTGA
GCGGATCGATTCTATGCGTACC
GCGGATCGATGACTTACTGCCG
GCGGATCGATTTCGGTTCCCAC
GCGGATCGATCTTAGCGTGAGT
GCGGATCGATCCTGGGTTAATC
GCGGATCGATCGCAAGTAAAGC
GCGGATCGATCACCATTTACCC
GCGGATCGATTCGCGATCTGAC
GCGGATCGATGTACAACTCTAG
GCGGATCGATTGGAACAGTCTG
GCGGATCGATTCTGTACGCTGA
GCGGATCGATATTGCCTTCTTC
GCGGATCGATTACGGCTTTCCT
GCGGATCGATAGATTTGAGTCC
GCGGATCGATTAAACGCTCCAG
GCGGATCGATAAGCCCATTGCC
GCGGATCGATACTAACGGTATC
GCGGATCGATTGGCCAGTACTA
GCGGATCGATTTTACCCGTCGA
GCGGATCGATAGGGAATGTTCA
GCGGATCGATTCATTCACGAAG
GCGGATCGATGCGCAGTTTATA
GCGGATCGATTCGTTTCGCACG
GCGGATCGATCAGTCGTGAGGA
GCGGATCGATGTGCCTTTAAGC
GCGGATCGATGTTATCAGGGCC
GCGGATCGATACGGTTCCTAGG
GCGGATCGATATTACTCGTGGG
GCGGATCGATTCGCGCTTGACA
GCGGATCGATTGCGAAGCTCAC
GCGGATCGATAAGCTCAACGCA
GCGGATCGATCAGTTGACGCTC
GCGGATCGATCTAATCCAGATG
GCGGATCGATGGGAACAAGTCA
GCGGATCGATGACGGAGAACCT
GCGGATCGATACCACTATTCAC
GCGGATCGATCCCATGACGGAA
GCGGATCGATTTCCTCAGCCTC
GCGGATCGATCACGTTCCAGCA
GCGGATCGATTGCACGTTAACC
GCGGATCGATGGGCTAGGAGAT
GCGGATCGATTGACTATTTCCC
GCGGATCGATGTCTCTGCTATT
GCGGATCGATATCGAGGCCTAA
GCGGATCGATAAAGCCCACGAC
GCGGATCGATCGTAAGGCTAAC
GCGGATCGATTATAAGTGCTCC
GCGGATCGATGACATCGAGTAG
GCGGATCGATCGTACTTCCTCG
GCGGATCGATAAAGGGATGCCA
GCGGATCGATTTGACAAGTCCT
GCGGATCGATATCTCGCCACTT
GCGGATCGATCAGAATCCTTCC
GCGGATCGATCACTTCTCCTAC
GCGGATCGATGATCTACGCCGT
GCGGATCGATCGCTGATGATGA
GCGGATCGATAGGTCCCAATCG
GCGGATCGATTGCGTCGAGTAC
GCGGATCGATTTTCCACGCAGT
GCGGATCGATAGCGAATAACCC
GCGGATCGATGGAACGGTCTCA
GCGGATCGATACCACGAAGGGA
GCGGATCGATAATCGTCTGGAC
GCGGATCGATAGCATACTCAGC
GCGGATCGATTAGATCTGCCAA
GCGGATCGATCAGCGTTGGTAC
GCGGATCGATTAGTTGGTTGGA
GCGGATCGATGAGAACGTCATA
GCGGATCGATGAAGGACCTAGT
GCGGATCGATTACGTGCAGTAT
GCGGATCGATTTGTCATGCGTG
GCGGATCGATCTCGACTTTCAC
GCGGATCGATGTCAATTCTCAG
GCGGATCGATTCATCCGCGACA
GCGGATCGATGTCCCAATGACT
GCGGATCGATTGCAGATCGGCT
GCGGATCGATGGATACTCGTGA
ATACCTGGAGAGCAGTTGGTGG
ATACCTGGAGAGGTTATCGATC
ATACCTGGAGACGTCGAGTCCA
ATACCTGGAGCTACTCGATCTC
ATACCTGGAGATTTGCCCAGCT
ATACCTGGAGCTAAGAGCTCAA
ATACCTGGAGCGTCCAAAGGTC
ATACCTGGAGCTAAGGTCAGAA
ATACCTGGAGAATTAGAAGGGC
ATACCTGGAGCATCCTCCACTC
ATACCTGGAGACGCGATCAGTT
ATACCTGGAGTTAGGCAATGTC
ATACCTGGAGAAGCTCTCTGAT
ATACCTGGAGCCTCATAGTAGA
ATACCTGGAGCATCTCGACAAT
ATACCTGGAGACAACAGCGGAT
ATACCTGGAGCTGGGCTTGGTA
ATACCTGGAGCAAACACCACAT
ATACCTGGAGAACTGATAGGAG
ATACCTGGAGGGTTATGAGTCG
ATACCTGGAGATAGCTGTGTCT
ATACCTGGAGGTTGTGATGTGC
ATACCTGGAGCGTCAATAGCTG
ATACCTGGAGGTGCACCATGTG
ATACCTGGAGTACCCAATGAAC
ATACCTGGAGGGTCGTCAATCA
ATACCTGGAGAGATACCTGGAG
ATACCTGGAGTCGACCAGATCT
ATACCTGGAGGCGGATAGTAGG
ATACCTGGAGAAACGGATCAGT
ATACCTGGAGAGCCATGAGAAT
ATACCTGGAGCGAGACGTTTAA
ATACCTGGAGGCTGTAAACGGC
ATACCTGGAGTCCCTATAGCCA
ATACCTGGAGCAGCAACCGATC
ATACCTGGAGTGTTCGGATTAG
ATACCTGGAGCAAATCGAAAGC
ATACCTGGAGGACGCAACCTCT
ATACCTGGAGGCTGATCCACCT
ATACCTGGAGATAACGCAAGTC
ATACCTGGAGCCTCTGAAAGTT
ATACCTGGAGTGGTCGTGCCAT
ATACCTGGAGCGATGTCCAAGT
ATACCTGGAGGCTTCATGAACC
ATACCTGGAGTGCGTGCAGACA
ATACCTGGAGTTCTAACGCTTC
ATACCTGGAGTCTATCGACACA
ATACCTGGAGAATGGAGCAACA
ATACCTGGAGATTAGGAGGTCT
ATACCTGGAGAGCTAGGGTGCT
ATACCTGGAGCGTAGGATTCTG
ATACCTGGAGACAGATCAACGC
ATACCTGGAGTCGAGTTACTAG
ATACCTGGAGACGCCGTGACTT
ATACCTGGAGAGGTGTGACCGT
ATACCTGGAGTATGATGTTCCC
ATACCTGGAGCTTCGCGTAACG
ATACCTGGAGTTCGCTGACAGA
ATACCTGGAGCGATTTCACCGA
ATACCTGGAGTGGTATGGAGGT
ATACCTGGAGATCGAGTTAGGC
ATACCTGGAGAGATCTGTGACG
ATACCTGGAGTGCTAGCCTATA
ATACCTGGAGATGTGCCTTCTG
ATACCTGGAGACTCTTCCTCAT
ATACCTGGAGTGGGATTGACAG
ATACCTGGAGAACGTGATTTGG
ATACCTGGAGGGAGGTTACTAT
ATACCTGGAGGCATGTATCCTT
ATACCTGGAGATGTGCATCTGG
ATACCTGGAGAAAGTCGCGTGT
ATACCTGGAGGGGCTACAGTTC
ATACCTGGAGCCTACCGTTAAT
ATACCTGGAGGACGGCATAATG
ATACCTGGAGTGTCCTGCGGTA
ATACCTGGAGCGACATCTGGAT
ATACCTGGAGATGCGTATTCCC
ATACCTGGAGAAGCGGAACCTA
ATACCTGGAGCGGAACATTGTA
ATACCTGGAGGTGCTCCTAAGG
ATACCTGGAGACCGTCCCATTC
ATACCTGGAGTGCTATCGGACG
ATACCTGGAGTTAGGATGCGCG
ATACCTGGAGATCAGTCAAGGA
ATACCTGGAGCACAACCATGAT
ATACCTGGAGCATGTCCGAGTC
ATACCTGGAGTTATGGTAGACC
ATACCTGGAGTATACGAACCCG
ATACCTGGAGAACTAACGTCGA
ATACCTGGAGGGTAAATCTCCC
ATACCTGGAGGCTACAATGTGG
ATACCTGGAGTACACTCCACAA
ATACCTGGAGTAGATACATCCC
ATACCTGGAGGTTGTACGAGCC
ATACCTGGAGTTTCGCGTGTAA
ATACCTGGAGCGTTCGTTTATG
ATACCTGGAGTGGTGAGGTGAT
ATACCTGGAGATTGGACTTAGC
ATACCTGGAGTGGACATACTGG
ATACCTGGAGTTGGCTGTCTGT
ATACCTGGAGCTCCCGTGTAAG
ATACCTGGAGCAATCTGGGTGT
ATACCTGGAGGGAAGTTCAGCA
ATACCTGGAGCACCATGCCATT
ATACCTGGAGCCGTGAAAGACC
ATACCTGGAGTGCAGAACAGTG
ATACCTGGAGTGGGAATGAGGA
ATACCTGGAGTAGACTGGACCA
ATACCTGGAGGGTAGTCGAAAC
ATACCTGGAGCTGCTGGGTTCA
ATACCTGGAGGGACCGACAATG
ATACCTGGAGACGTCCGTAATT
ATACCTGGAGACTTGAGTCATC
ATACCTGGAGTCACAGTGATAG
ATACCTGGAGGGGTACAGCTTC
ATACCTGGAGTTCTGCTGGAGA
ATACCTGGAGCTCGTAGAGCGT
ATACCTGGAGTCTGACGGGACT
ATACCTGGAGCAGACCTGCTCA
ATACCTGGAGCTCACTGGATAT
ATACCTGGAGTACTAGGGTTAG
ATACCTGGAGTAGGTAAGACCA
ATACCTGGAGGTCAGTAGTCTG
ATACCTGGAGACGATCCGCACT
ATACCTGGAGTGGACGACGATC
ATACCTGGAGACTGGATATGCT
ATACCTGGAGGTGACGCGGTAT
ATACCTGGAGCGTTTATCACAC
ATACCTGGAGGGCATAATGATC
ATACCTGGAGCGATTGGCGATA
ATACCTGGAGCGTCGTGAAATT
ATACCTGGAGACCACGCAAACT
ATACCTGGAGAGATGCCGATGT
ATACCTGGAGGTGTTAGGCAAT
ATACCTGGAGTCTTCCTGCAAC
ATACCTGGAGCTTAGCAAAGAG
ATACCTGGAGTTACAGCACCGG
ATACCTGGAGAGATCGTTTGGC
ATACCTGGAGAGATTGGACAAG
ATACCTGGAGCACAAATCAACC
ATACCTGGAGAAAGGAACAGAC
ATACCTGGAGCACTGTGTTATG
ATACCTGGAGGTTGGCTATCAA
ATACCTGGAGCTCATGTAGTCT
ATACCTGGAGAGCATGCGCTTT
ATACCTGGAGGTTGGTCTACTA
ATACCTGGAGGTCGACAGATAG
ATACCTGGAGAGGAACGCCGAT
ATACCTGGAGCCGGAGAATACC
ATACCTGGAGTCAGCCCAAGTT
ATACCTGGAGATCATTGAGGCT
ATACCTGGAGAAGCTAACGCAC
ATACCTGGAGTTAAACGCGAAG
ATACCTGGAGTTAGCTTCTCTG
ATACCTGGAGTTAGGTAGCAAC
ATACCTGGAGCCTAATCCTGAG
ATACCTGGAGAGGCGGCATTAC
ATACCTGGAGGAGCATCACTAC
ATACCTGGAGGTGCAATGTCGT
ATACCTGGAGCGGTGATGACTT
ATACCTGGAGCGACGCCTTATG
ATACCTGGAGCAAACAAGAAGG
ATACCTGGAGTGTGATTCTGTG
ATACCTGGAGATAGGATGGCTC
ATACCTGGAGGTACTGGACCCT
ATACCTGGAGTGTTACTTCCCG
ATACCTGGAGGCAGAGAGAGAA
ATACCTGGAGGATGGCATCAAA
ATACCTGGAGATTTAGGGCGGG
ATACCTGGAGCTTGCGGGTGTT
ATACCTGGAGCCTTTCCGTATC
ATACCTGGAGAAAGCGGGAGCT
ATACCTGGAGTTAGTGCTAGCA
ATACCTGGAGCTAAATGTTCGG
ATACCTGGAGCCCAAGATCGAC
ATACCTGGAGGAGTGGTTGACC
ATACCTGGAGTTCCGCTGATAT
ATACCTGGAGCGGCGACTAACA
ATACCTGGAGTGGGCACATTAG
ATACCTGGAGTGTTTCCGTTGC
ATACCTGGAGCCTTTCGGCAGT
ATACCTGGAGAACCGCTAATGA
ATACCTGGAGCTTAGGTAGCGT
ATACCTGGAGGCCACCTGATAC
ATACCTGGAGACAGAAGGACCT
ATACCTGGAGCATACCCGGTTC
ATACCTGGAGAGTACGGAAAGC
ATACCTGGAGATCCAAGCCGTC
ATACCTGGAGCCATCTCTGGGA
ATACCTGGAGTTGGTGATGTCT
ATACCTGGAGCTTGCTGCCTAT
ATACCTGGAGTACCATCCCAGG
ATACCTGGAGCGCCCTGCTATA
ATACCTGGAGCCTGTAGTGGCA
ATACCTGGAGTTTGCCGGAAGG
ATACCTGGAGGCTATTGGTAGG
ATACCTGGAGGAGTGTGGCATA
ATACCTGGAGACGCTTACCCGA
ATACCTGGAGTTCAGTCGCCTA
ATACCTGGAGCAACGGCATGAG
ATACCTGGAGAGTGTCAGTCAA
ATACCTGGAGCGATTCCGGCAT
ATACCTGGAGGGATTGTTTCTG
ATACCTGGAGAATCGAACACGT
ATACCTGGAGCGAAGGTTCGAT
ATACCTGGAGAATCGCTGGATG
ATACCTGGAGAACTTGCTCACC
ATACCTGGAGTGCGCCAATCGT
ATACCTGGAGGTTGCGAATGGG
ATACCTGGAGCGAAGGGATCAT
ATACCTGGAGTTGCTGGATCGT
ATACCTGGAGGATGGCAAACAT
ATACCTGGAGAAACGTCCCGTT
ATACCTGGAGCTGCGCTTATCC
ATACCTGGAGTAGTCAGCGTGG
ATACCTGGAGCTATCCCATCCG
ATACCTGGAGACATGCCGTGCT
ATACCTGGAGTGCTAATGACGT
ATACCTGGAGAACAGGCGGGTA
ATACCTGGAGTAGAGAGGCTGC
ATACCTGGAGGCACACTCTCCT
ATACCTGGAGCAGATCCGTGAC
ATACCTGGAGTCCGTAAGGTTC
ATACCTGGAGTTAGGTAGTGGG
ATACCTGGAGAATATAGGTCCG
ATACCTGGAGAGCCTCACCATC
ATACCTGGAGGGTTGTTCCATC
ATACCTGGAGTTGAGCCCGGAT
ATACCTGGAGGAGATAGTACTG
ATACCTGGAGAAACTAGCCCTA
ATACCTGGAGTGGAGTAACCAT
ATACCTGGAGGACCAGACCTGT
ATACCTGGAGGAGGGTGATTGC
ATACCTGGAGCGCTGAGCCAAT
ATACCTGGAGTTAGAGCCCACT
ATACCTGGAGAATTCTGTTGCG
ATACCTGGAGCTCATCTACGTC
ATACCTGGAGGGGACTAATTCC
ATACCTGGAGAACTTCGACCAG
ATACCTGGAGGTATATCCGGAA
ATACCTGGAGTTCCGAGCAACT
ATACCTGGAGGCCCGTGTTGAT
ATACCTGGAGTGCCGTCTCAAC
ATACCTGGAGTATCGCCGGGTA
ATACCTGGAGGTCATAGCGTGT
ATACCTGGAGCGCGCTATACGA
ATACCTGGAGTGCAAGTGCACT
ATACCTGGAGACTGCACGCCAT
ATACCTGGAGCAGCGAAGACCT
ATACCTGGAGACGCATAGGCAC
ATACCTGGAGATTTCGATGACG
ATACCTGGAGAAGCGGGCTTGA
ATACCTGGAGTGTGACTTAGGC
ATACCTGGAGTTTCGAAGAAGG
ATACCTGGAGCATTAGTGTACC
ATACCTGGAGTAGGCAGATGGA
ATACCTGGAGCCAGCTTTCCGT
ATACCTGGAGGTAACTTGCCCT
ATACCTGGAGGGATCAACTATC
ATACCTGGAGTCCACTTGGATA
ATACCTGGAGTGCGATCGTTAG
ATACCTGGAGGTCCGGTCCAAA
ATACCTGGAGGCGTTATTGTGC
ATACCTGGAGAACGACTGCTCG
ATACCTGGAGTAGCGTCATATG
ATACCTGGAGGGACTTCTAGTT
ATACCTGGAGCCCTGGCAGTAT
ATACCTGGAGTCCACATCACTG
ATACCTGGAGTGAACCATCGTA
ATACCTGGAGGTCCACCTAGAC
ATACCTGGAGGAACCTCAGGCT
ATACCTGGAGCCCATCTGGAGA
ATACCTGGAGGATCAGTAGGAT
ATACCTGGAGGGTGTCGGTTGT
ATACCTGGAGCCTATTGAAGCC
ATACCTGGAGGATTCGCGTGCA
ATACCTGGAGAACATGAAGCGC
ATACCTGGAGGTTACCCTCGGA
ATACCTGGAGCGTGATGAGGTA
ATACCTGGAGGTTGGAGACTAA
ATACCTGGAGCGACGAGAGATC
ATACCTGGAGGGCGGGATATTC
ATACCTGGAGCCTTAAGTAGTC
ATACCTGGAGATAGCCTCCGTA
ATACCTGGAGGGCGTACTTCTA
ATACCTGGAGCCACTCTAGGTC
ATACCTGGAGGCTTTCAGCCAG
ATACCTGGAGGATGAACATGTC
ATACCTGGAGCCTAAGCTAGCT
ATACCTGGAGGGTGGCCGTATA
ATACCTGGAGGAGGAATCACGG
ATACCTGGAGGCGCACGGTAAA
ATACCTGGAGGAAGTTCTTAGG
ATACCTGGAGACCCACATGCTT
ATACCTGGAGATTTGGCCTCTA
ATACCTGGAGGACATTTGACAG
ATACCTGGAGTGACACAGCGAC
ATACCTGGAGAGGGACGGATTC
ATACCTGGAGGGTCTAATTAGG
ATACCTGGAGGCCTTAGCTAGC
ATACCTGGAGCGGATCACCTGA
ATACCTGGAGGCGATGTACGAC
ATACCTGGAGAGTCCTGGTACT
ATACCTGGAGCAAATCTCGCCG
ATACCTGGAGCTGTGAAGAGAA
ATACCTGGAGTAACAGTGCCTT
ATACCTGGAGCTTCCTGCTGTC
ATACCTGGAGTCCTTAGTCGGG
ATACCTGGAGAACCCACTATCT
ATACCTGGAGTCTAATGCCTGC
ATACCTGGAGCAGCTCAGGACA
ATACCTGGAGGCGACGTTACGA
ATACCTGGAGTTCACTACGTAG
ATACCTGGAGGTGTCGAAGCTC
ATACCTGGAGGGGCGTATTTGA
ATACCTGGAGTCCGCGGCTTAA
ATACCTGGAGAAGTAGCCCGCT
ATACCTGGAGTTGTCCTCGACG
ATACCTGGAGTGAACCTGATCG
ATACCTGGAGGAGAGGTCCACT
ATACCTGGAGAAAGCACTAGCG
ATACCTGGAGTAAGTAATCCCG
ATACCTGGAGTACAACCCGATG
ATACCTGGAGGGAGTGTTGGAA
ATACCTGGAGGCGTAACCAGTA
ATACCTGGAGGCCTAAACGAAG
ATACCTGGAGATCGTACCCGTT
ATACCTGGAGCGAGAATCGACG
ATACCTGGAGAAGTTGTGCTAC
ATACCTGGAGGTAGCCTGTTAC
ATACCTGGAGTGTTTCGGTACA
ATACCTGGAGGTGCAAACCACT
ATACCTGGAGGTACATAGATCC
ATACCTGGAGGCTCTTTCAGAA
ATACCTGGAGGGGCATAAACGT
ATACCTGGAGCGTGCAACACAA
ATACCTGGAGTAGCATCGATGC
ATACCTGGAGGCGTGCTACCAA
ATACCTGGAGCTAGACGACCTG
ATACCTGGAGGCGAACGTAGAC
ATACCTGGAGAAGGGCAAATCA
ATACCTGGAGGCTCCGGAAATT
ATACCTGGAGGTATGCCGAGAA
ATACCTGGAGCTTTAACTGCGC
ATACCTGGAGATGCGTAGCTGA
ATACCTGGAGGATAGGTGTAGC
ATACCTGGAGCCGGATCAAGTT
ATACCTGGAGTAAAGCCGGTGC
ATACCTGGAGTCAGGGAAAGCG
ATACCTGGAGCATCCTCATCAA
ATACCTGGAGGAAGTCGTAGTA
ATACCTGGAGACATGGCAAGCC
ATACCTGGAGTGAACGCAATCC
ATACCTGGAGAGGTGCAAGGTA
ATACCTGGAGGGGCAGTGGTAA
ATACCTGGAGACGTACGGTCAT
ATACCTGGAGTCCCTAACCATA
ATACCTGGAGGCTTTGCGTCGT
ATACCTGGAGACTCATCGTCTC
ATACCTGGAGACATCCGGTCTC
ATACCTGGAGTCCACACCTCCA
ATACCTGGAGACTGCGACAAAG
ATACCTGGAGGTAGGTACTAGC
ATACCTGGAGATAGGTGGTACC
ATACCTGGAGACCACGGCTGTT
ATACCTGGAGAGGCATGCAGAG
ATACCTGGAGCACCGAAGGTCA
ATACCTGGAGACCTCACTCGAA
ATACCTGGAGCTAGGCCTTTGA
ATACCTGGAGAGACTAGGAGGA
ATACCTGGAGTTAGGGACCCTC
ATACCTGGAGTGTTCTCTCTGG
ATACCTGGAGATTGGGCTAGTT
ATACCTGGAGACTCCGATGGAC
ATACCTGGAGACAGGGCCTCTT
ATACCTGGAGTCAGCATTTAGG
ATACCTGGAGGTGTAACGCGGT
ATACCTGGAGCAGAAGGTTGTT
ATACCTGGAGGAATCGGTGTTC
ATACCTGGAGGAATCAGCTTGA
ATACCTGGAGTGCGTTGATGTG
ATACCTGGAGATGGACGATCGT
ATACCTGGAGCCTTATATGTCC
ATACCTGGAGAATCCCGCGCTT
ATACCTGGAGCACCGTATGTTC
ATACCTGGAGGAGGCATTTGCA
ATACCTGGAGGTACATCTTCAC
ATACCTGGAGGGGATTAGCTGC
ATACCTGGAGGGGTTGAACCTA
ATACCTGGAGTCGTCACTTAAG
ATACCTGGAGTCGCTTAGCCTT
ATACCTGGAGAAATGCTACGGG
ATACCTGGAGGTGTTTGTGAGC
ATACCTGGAGCTGGTAGCGTAT
ATACCTGGAGTAAGTGGGTCGA
ATACCTGGAGTTTACCACGCCA
ATACCTGGAGAGGCTGCGTCTA
ATACCTGGAGGGTTGTCCTCTG
ATACCTGGAGGTTCTGAGCGAC
ATACCTGGAGACCCGAACTCAT
ATACCTGGAGAGCGGCTGAAAC
ATACCTGGAGGAGACAATGACG
ATACCTGGAGGTTCTCCTACTC
ATACCTGGAGGCTTAAGCCGTT
ATACCTGGAGTCAAGGCCTGGA
ATACCTGGAGCTGACGAGAAAC
ATACCTGGAGACCAGTTCACCC
ATACCTGGAGCTTAGACGTCTT
ATACCTGGAGCCGGCATATGAG
ATACCTGGAGACATCTAAGGAG
ATACCTGGAGGGAGTTTGCACA
ATACCTGGAGGTGAGCGATCGA
ATACCTGGAGCAAATGACGGGC
ATACCTGGAGGCTTGATCCCAG
ATACCTGGAGTGACACTGTGCG
ATACCTGGAGCTCAGATAAGGG
ATACCTGGAGCGTATGAACTCC
ATACCTGGAGGCAATCGGAACC
ATACCTGGAGAACTGCGTCTTT
ATACCTGGAGATGACCACCAAT
ATACCTGGAGCTAGATGGCGCA
ATACCTGGAGGGGCTCCGAATA
ATACCTGGAGTGCCTATGGAGT
ATACCTGGAGACATAGTGGCGT
ATACCTGGAGGGGTATCTACCT
ATACCTGGAGTTCAATTGCAGG
ATACCTGGAGATGCTCTGGCTA
ATACCTGGAGGGTAGAGAGCTC
ATACCTGGAGCGAACGATACAG
ATACCTGGAGCCTCGTCAGAAC
ATACCTGGAGCCATTACGATTC
ATACCTGGAGGACAATAGGAGA
ATACCTGGAGGTGAAGCTTATG
ATACCTGGAGGTCGCTAAGTAA
ATACCTGGAGCCGGTACATTCC
ATACCTGGAGCGTGTACTGAAT
ATACCTGGAGTGGGTTTGTACT
ATACCTGGAGGAAAGCATGCGA
ATACCTGGAGAATGGTTCCCTT
ATACCTGGAGCTTGCGTATCAG
ATACCTGGAGCGCCGAATTACT
ATACCTGGAGAGGCTCTGCTGA
ATACCTGGAGCGCGACTTGAGA
ATACCTGGAGTATCAAAGGGTC
ATACCTGGAGGACAATCGAGAA
ATACCTGGAGTGCTGAGTTCCT
ATACCTGGAGCGCTATCTCTTG
ATACCTGGAGTCGAGCATTATG
ATACCTGGAGCGCGATACAAAT
ATACCTGGAGATGTCGCCTGAA
ATACCTGGAGTCACCAAACCGG
ATACCTGGAGATGGACACGTTC
ATACCTGGAGGTCCAGATTTCC
ATACCTGGAGGGATAAAGGGAT
ATACCTGGAGGGAAGCTTATCC
ATACCTGGAGGGTCGACAGAGA
ATACCTGGAGTAGATCCACGTA
ATACCTGGAGTGGCTTCTACCA
ATACCTGGAGAACCACCTAAAG
ATACCTGGAGATCATGCGTAGG
ATACCTGGAGCACCTTACTAGA
ATACCTGGAGGCTTTCCAACGG
ATACCTGGAGGCTATGTCTCTC
[truncated: 292,913+ more rows]
